# Supplementary material for: Impact of body mass index on survival of medical patients with sepsis: a prospective cohort study in a university hospital in China
Source: PubMed Central journal article supplement — BMJ Open. 2018 Sep 12;8(9):e021979. doi: 10.1136/bmjopen-2018-021979 (PMC6144486; doi:10.1136/bmjopen-2018-021979), 2018-09-12
Supplement: bmjopen-2018-021979.draft_revisions.pdf [file bmjopen-2018-021979.draft_revisions.pdf]

# BMJ Open

BMJ Open is committed to open peer review. As part of this commitment we make the peer review history of every article we publish publicly available.

When an article is published we post the peer reviewers' comments and the authors' responses online. We also post the versions of the paper that were used during peer review. These are the versions that the peer review comments apply to.

The versions of the paper that follow are the versions that were submitted during the peer review process. They are not the versions of record or the final published versions. They should not be cited or distributed as the published version of this manuscript.

BMJ Open is an open access journal and the full, final, typeset and author-corrected version of record of the manuscript is available on our site with no access controls, subscription charges or pay-per-view fees (<http://bmjopen.bmj.com>).

If you have any questions on BMJ Open's open peer review process please email [info.bmjopen@bmj.com](mailto:info.bmjopen@bmj.com)

# BMJ Open

## The impact of body mass index on survival of medical patients with sepsis: a prospective cohort study in a university hospital in China

|                               |                                                                                                                                                                                                                                                                                                                                                                                                                                                                                                                                                                                                                                                                                                                                                                                                                                                                                                                           |
|-------------------------------|---------------------------------------------------------------------------------------------------------------------------------------------------------------------------------------------------------------------------------------------------------------------------------------------------------------------------------------------------------------------------------------------------------------------------------------------------------------------------------------------------------------------------------------------------------------------------------------------------------------------------------------------------------------------------------------------------------------------------------------------------------------------------------------------------------------------------------------------------------------------------------------------------------------------------|
| Journal:                      | <i>BMJ Open</i>                                                                                                                                                                                                                                                                                                                                                                                                                                                                                                                                                                                                                                                                                                                                                                                                                                                                                                           |
| Manuscript ID                 | bmjopen-2018-021979                                                                                                                                                                                                                                                                                                                                                                                                                                                                                                                                                                                                                                                                                                                                                                                                                                                                                                       |
| Article Type:                 | Research                                                                                                                                                                                                                                                                                                                                                                                                                                                                                                                                                                                                                                                                                                                                                                                                                                                                                                                  |
| Date Submitted by the Author: | 29-Jan-2018                                                                                                                                                                                                                                                                                                                                                                                                                                                                                                                                                                                                                                                                                                                                                                                                                                                                                                               |
| Complete List of Authors:     | Zhou, Qingtao; Peking University Third Hospital, Department of pulmonary and critical care medicine<br>Wang, Meng; Peking University Third Hospital, Department of pulmonary and critical care medicine<br>Li, Shuo; Peking University Third Hospital, Emergency Department<br>Zhang, Jing; Peking University Third Hospital, Department of pulmonary and critical care medicine<br>Ma, Qingbian; Peking University Third Hospital, Emergency Department<br>Ding, Yanling; Peking University Third Hospital, Department of pulmonary and critical care medicine<br>Ge, Hongxia; Peking University Third Hospital, Emergency Department<br>Shen, Ning; Peking University Third Hospital, Department of pulmonary and critical care medicine<br>Zheng, Yaan; Peking University Third Hospital, Emergency Department<br>Sun, Yongchang; Peking University Third Hospital, Department of pulmonary and critical care medicine |
| Keywords:                     | Adult intensive & critical care < INTENSIVE & CRITICAL CARE, INFECTIOUS DISEASES, THORACIC MEDICINE                                                                                                                                                                                                                                                                                                                                                                                                                                                                                                                                                                                                                                                                                                                                                                                                                       |
|                               |                                                                                                                                                                                                                                                                                                                                                                                                                                                                                                                                                                                                                                                                                                                                                                                                                                                                                                                           |

SCHOLARONE™  
Manuscripts

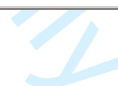

1  
2  
3  
4 **1 The impact of body mass index on survival of medical patients with sepsis: a**  
5  
6 **2 prospective cohort study in a university hospital in China**  
7

8  
9  
10  
11  
12  
13  
14  
15  
16  
17  
18  
19  
20  
21  
22  
23  
24  
25  
26  
27  
28  
29  
30  
31  
32  
33  
34  
35  
36  
37  
38  
39  
40  
41  
42  
43  
44  
45  
46  
47  
48  
49  
50  
51  
52  
53  
54  
55  
56  
57  
58  
59  
60

3  
4 Qingtao Zhou<sup>1</sup>, Meng Wang<sup>1</sup>, Shuo Li<sup>2</sup>, Jing Zhang<sup>1</sup>, Qingbian Ma<sup>2</sup>, Yanling Ding<sup>1</sup>,  
5 Hongxia Ge<sup>2</sup>, Ning Shen<sup>1</sup>, Yaan Zheng<sup>2</sup>, Yongchang Sun<sup>1\*</sup>

6  
7 <sup>1</sup> Department of Pulmonary and Critical Care Medicine, Peking University Third  
8 Hospital, Beijing, China.

9 <sup>2</sup> Emergency Department, Peking University Third Hospital, Beijing, China.

10  
11 **\*Corresponding author:** Yongchang Sun, Department of Respiratory and Critical  
12 Care Medicine, Peking University Third Hospital, 49 North Garden Road, Haidian  
13 District, Beijing 100191, P R China. Email: suny@bjmu.edu.cn

1  
2  
3  
4  
5  
6  
7  
8  
9  
10  
11  
12  
13  
14  
15  
16  
17  
18  
19  
20  
21  
22  
23 **Abstract**

24 **Objective** To evaluate the impact of body mass index (BMI) on survival of a Chinese  
25 cohort of medical patients with sepsis.

26 **Design** A single-center prospective cohort study conducted from May 2015 to April  
27 2017.

28 **Setting** A tertiary care university hospital in China.

29 **Participants** 178 patients with sepsis admitted to the medical intensive care unit (ICU)  
30 were included.

31 **Main outcome measures** The primary outcome was 90-day mortality. The secondary  
32 outcomes were in-hospital mortality, length of ICU stay, and length of hospital stay.

33 **Results** The median age (interquartile range) was 78 (66-84) years and the majority of  
34 patients (77.0%) were older than 65 years. The 90-day mortality was 47.2%. The  
35 in-hospital mortality was 41.6%, and the length of ICU stay and hospital stay were 12  
36 (5-22) and 15 (9-28) days, respectively. Compared with in-hospital survivors,  
37 non-survivors had significantly lower BMI and PaO<sub>2</sub>/FiO<sub>2</sub> (both p < 0.05), and higher  
38 lactate, bilirubin, INR, sequential organ failure assessment (SOFA) score, and  
39 APACHE II score (all p < 0.05). Those with healthcare-acquired infections,  
40 hypotension, oliguria, septic shock, and intubation were also at increased risk of death  
41 (all p < 0.05). Cox proportional hazard regression analysis identified that sequential  
42 organ failure assessment (SOFA) score (HR = 1.229, p < 0.001), APACHE II score  
43 (HR = 1.050, p < 0.001) and BMI (HR = 0.940, p = 0.029) were all independent  
44 predictors of the 90-day mortality. Patients were divided into four groups based on

1  
2  
3  
4 45 BMI (underweight, normal, overweight, and obese). Differences in survival among  
5  
6 46 the four groups were demonstrated by Kaplan-Meier survival analysis ( $p = 0.008$ ),  
7  
8 47 with the underweight patients showing a lower survival rate.

9  
10  
11 48 **Conclusions** SOFA score, APACHE II score and BMI were independent factors  
12  
13 49 associated with survival in a Chinese cohort of medical patients with sepsis, while  
14  
15 50 underweight patients were at higher risk of death.

16  
17  
18 51  
19  
20 52 **Key words:** Sepsis; Septic shock; Body mass index; Critical care; Mortality

21  
22  
23 53  
24  
25 54 **Strengths and limitations of this study**

26  
27  
28 55 Our prospective observational cohort study was focused on medical patients with  
29  
30 56 sepsis.

31  
32  
33 57 The clinical characteristics and clinical outcomes of medical patients with sepsis were  
34  
35 58 analysed in a university hospital in China.

36  
37  
38 59 The impact of BMI on survival of medical patients with sepsis was evaluated.

39  
40 60 Our analyses were limited by the use of weight ascertained at ICU admission, rather  
41  
42 61 than the patient's true outpatient weight.

43  
44  
45 62

46  
47  
48 63

49  
50  
51 64

52  
53  
54 65

55  
56  
57 66

## 67 **Introduction**

68 Sepsis is a major cause of morbidity and mortality worldwide <sup>[1]</sup>. Of these  
69 patients, half are treated in the intensive care unit (ICU) <sup>[2]</sup>. In a national  
70 population-based study of sepsis in Spain, medical diagnostic categories were the  
71 majority of patients who developed sepsis, while only 26% of surgical patients  
72 developed sepsis <sup>[3]</sup>. Many studies have analyzed the characteristics and clinical  
73 outcomes of surgical patients with sepsis but few of these have focused on medical  
74 patients.

75 Body mass index (BMI) is a simple index of weight-for-height that is commonly  
76 used to classify whether adults are underweight, overweight and obese <sup>[4]</sup>. Several  
77 studies have examined the effects of BMI on mortality with conflicting conclusions.  
78 Lower mortality in the obese has been observed in some studies <sup>[5-9]</sup>, but some  
79 researchers believe that the true paradox may lie in the variations in sepsis  
80 interventions, such as the administration of resuscitation fluids and antimicrobial  
81 therapy <sup>[6]</sup>. In other studies, morbidly obese and underweight patients have been  
82 shown to be associated with higher mortality <sup>[10,11]</sup>. Thus, the impact of BMI on  
83 survival of patients with sepsis is still controversial.

84 As the relationship between BMI and clinical outcomes of sepsis is complex,  
85 which may be related partly to differences in patient characteristics, we therefore set  
86 out to evaluate prospectively the impact of BMI on survival in a cohort of medical  
87 patients with sepsis admitted to the medical ICU in a university hospital.

88

## 89 **Patients and Methods**

### 90 **Design**

91 This was a prospective cohort study, which was conducted in the medical ICU of  
92 a university-affiliated urban teaching hospital from May 2015 to April 2017.

### 93 **Subjects**

94 Hospitalized patients admitted to the medical ICU with sepsis acquired in the  
95 community or in a hospital were eligible for the study if they met any of the following  
96 criteria of severe sepsis [12]: (1) sepsis-induced hypotension, (2) lactate above upper  
97 laboratory level limits, (3) urine output  $<0.5 \text{ mL Kg}^{-1} \text{ h}^{-1}$  for more than 2 h despite  
98 adequate fluid resuscitation, (4) acute lung injury with  $\text{Pao}_2/\text{Fio}_2 < 250$  in the absence  
99 of pneumonia as infection source, (5) acute lung injury with  $\text{Pao}_2/\text{Fio}_2 < 200$  in the  
100 presence of pneumonia as infection source, (6) creatinine  $>2.0 \text{ mg/dL}$  ( $176.8 \text{ }\mu\text{mol/L}$ ),  
101 (7) bilirubin  $>2 \text{ mg/dL}$  ( $34.2 \text{ }\mu\text{mol/L}$ ), (8) platelet count  $<100,000 \text{ }\mu\text{L}$ , and (9)  
102 coagulopathy (international normalized ratio  $>1.5$ ).

103 Patients were excluded from the study if they met one of the following criteria: (1)  
104 the patient had sepsis that required surgical treatment, or was caused by a surgical  
105 procedure related infection, (2) age  $<18$  years, (3) the patient had a positive HIV  
106 antibody titer or had known/suspected tuberculosis at baseline, (4) expected lifespan  
107  $<3$  months due to severe pre-existing comorbidities, (5) active Do Not Resuscitate or  
108 Do Not Intubate order, and (6) pregnant.

109 All patients accepted treatment according to the international guidelines for  
110 management of sepsis and septic shock [12,13]. We collected the following

1  
2  
3  
4 111 demographic and clinical data: patient's gender, age, weight, height, primary site of  
5  
6 112 infection, community-acquired or hospital-acquired infection, hypotension, lactate  
7  
8 113 level, oliguria,  $\text{PaO}_2/\text{FiO}_2$ , serum creatinine, total bilirubin, platelets, international  
9  
10 114 normalized ratio (INR), Glasgow coma scale, SOFA score, acute physiology and  
11  
12 115 chronic health evaluation (APACHE) II score, septic shock, non-invasive ventilation,  
13  
14 116 intubation, positive blood culture, length of ICU stay, and length of hospital stay.  
15  
16  
17 117 Those who survived to discharge were followed for at least 90 days.

18  
19  
20 118 BMI is defined as the weight in kilograms divided by the square of the height in  
21  
22 119 meters ( $\text{kg}/\text{m}^2$ ). Using the World Health Organization (WHO) criteria for designation  
23  
24 120 of BMI <sup>[4]</sup>, patients were classified as underweight ( $\text{BMI} < 18.50 \text{ kg}/\text{m}^2$ ), normal  
25  
26 121 weight ( $\text{BMI} = 18.50$  to  $24.99 \text{ kg}/\text{m}^2$ ), overweight ( $\text{BMI} = 25.0$  to  $29.99 \text{ kg}/\text{m}^2$ ), and  
27  
28 122 obese ( $\text{BMI} \geq 30.0 \text{ kg}/\text{m}^2$ ).

### 32 123 **Outcomes**

33  
34  
35 124 The primary outcome was 90-day mortality, while the secondary outcomes were  
36  
37 125 in-hospital mortality, length of ICU stay, and length of hospital stay.

### 38 126 **Statistical analysis**

39  
40  
41 127 Continuous variables were expressed as median (interquartile range) and  
42  
43 128 categorical variables as numbers (%). Clinical data were compared among the  
44  
45 129 in-hospital survivors and non-survivors. Continuous variables were compared using  
46  
47 130 the non-parametric Mann–Whitney U test, and categorical variables were compared  
48  
49 131 using the Chi squared test. Cox proportional hazard regression analysis was  
50  
51 132 undertaken to assess the factors associated with 90-day mortality. The variables  
52  
53  
54  
55  
56  
57  
58  
59  
60



1  
2  
3  
4 133 significantly associated with 90-day non-survival in the univariate analysis were used  
5  
6 134 in the Cox proportional hazard regression analysis.

7  
8 135 Patients were divided into four groups based on BMI (underweight, normal,  
9  
10 136 overweight, and obese). Clinical data were compared between the four groups, where  
11  
12  
13 137 continuous variables were compared using the non-parametric Kruskal-Wallis H test,  
14  
15 138 and categorical variables were compared using the Chi squared test. Kaplan-Meier  
16  
17 139 survival curves were constructed to show the survival probabilities at day-90  
18  
19  
20 140 according to BMI classification, and compared using the log rank test.

21  
22  
23 141 All analyses were conducted using SPSS, version 22.0 (IBM, Armonk, NY,  
24  
25 142 USA). A p value <0.05 was considered significant.

26  
27  
28 143

## 29 30 144 **Results**

31  
32  
33 145 In total, 178 medical patients with sepsis were included in this study, with male  
34  
35 146 patients accounting for 65.2% (n=116). The median age (interquartile range) was 78  
36  
37 147 (66-84) years, and most patients were at least 65 years old (137/178 cases, 77.0%).  
38  
39 148 The most common primary site of infection was the lung (131 cases, 73.6%),  
40  
41 149 followed by abdomen (15 cases, 8.4%), urinary tract (13 cases, 7.3%), gastrointestinal  
42  
43 150 tract (12 cases, 6.7%) and other sites (7 cases, 3.9%). Septic shock patients accounted  
44  
45 151 for 33.1% (59 cases). Blood culture was positive in 38 patients (21.3%). The 90-day  
46  
47 152 mortality was 47.2% (84/178 cases), and the in-hospital mortality was 41.6% (74/178  
48  
49 153 cases). The length of ICU stay and the length of hospital stay were 12 (5-22) and 15  
50  
51 154 (9-28) days, respectively.

1  
2  
3  
4 155 Compared with in-hospital survivors, non-survivors had significantly lower BMI  
5  
6 156 and PaO<sub>2</sub>/FiO<sub>2</sub> (both p < 0.05), higher lactate, bilirubin, INR, SOFA score and  
7  
8 157 APACHE II score (all p < 0.05). Meanwhile, more patients died with  
9  
10 158 healthcare-acquired infections, hypotension, oliguria, septic shock, and intubation (all  
11  
12  
13 159 p < 0.05) (table 1).

14  
15  
16 160 Cox proportional hazard regression analysis was conducted and the independent  
17  
18 161 factors for 90-day death were identified as SOFA score (HR = 1.220, p < 0.001),  
19  
20 162 APACHE II score (HR = 1.050, p < 0.001) and BMI (HR = 0.940, p = 0.029) (table  
21  
22  
23 163 2).

24  
25 164 Patients were divided into four groups based on BMI (underweight, normal,  
26  
27 165 overweight, and obese). The percentage of males (72.7%, 71.4%, 55.6%, and 18.2%,  
28  
29 166 p = 0.002), chronic obstructive pulmonary disease (24.2%, 21.4%, 0, and 27.3%,  
30  
31 167 p=0.017), hypotension (57.6%, 34.7%, 25.0%, and 9.1%, p = 0.007), septic shock  
32  
33 168 (57.6%, 30.6%, 25.0%, and 9.1%, p = 0.004), in-hospital mortality (60.6%, 41.8%,  
34  
35 169 30.6%, and 18.2%, p = 0.027) and 90-day mortality (66.7%, 48.0%, 36.1%, and  
36  
37 170 18.2%, p = 0.015) were statistically different among the four groups (table 3).

38  
39  
40  
41 171 Kaplan-Meier survival curves were constructed to show the survival probabilities  
42  
43 172 at day-90 according to BMI classification and these were compared using the log rank  
44  
45 173 test, which also showed that higher BMI was associated with better prognosis  
46  
47  
48 174 (p=0.008) (figure 1).

49  
50  
51  
52 175

## 53 176 **Discussion**

1  
2  
3  
4 177 This prospective observational cohort study was focused on medical patients with  
5  
6 178 sepsis admitted to the ICU, and the results showed that SOFA score, APACHE II score  
7  
8 179 and BMI were identified as independent factors for 90-day mortality by Cox  
9  
10 180 regression analysis. Mortality increased with increasing SOFA and APACHE II score,  
11  
12 181 which was consistent with previous studies<sup>[14-16]</sup>. However, BMI was also found to be  
13  
14 182 an independent predictor of survival, where 90-day mortality decreased with an  
15  
16 183 increase in BMI. While studies examining the risk factors associated with outcomes in  
17  
18 184 sepsis reached inconsistent conclusions on the association of BMI with mortality, our  
19  
20 185 results confirmed a protective effect of higher BMI on mortality in patients with  
21  
22 186 sepsis caused by medical conditions.

23  
24  
25  
26  
27  
28 187 Globally, the prevalence of obesity has reached epidemic proportions, especially  
29  
30 188 in developed countries. BMI is still a useful proxy of overall health because it is  
31  
32 189 highly correlated with body surface area, which is commonly used as a surrogate  
33  
34 190 measure in obesity classification. Even though it is widely accepted that obesity is a  
35  
36 191 risk factor for diabetes mellitus, hypertension, and cardiovascular diseases, the present  
37  
38 192 study and several other studies have indicated that overweight and obese patients with  
39  
40 193 sepsis tend to experience lower mortality. This has been called the “obesity paradox”  
41  
42 194 <sup>[5-9,17]</sup>. Although some researchers have expressed doubt that the true paradox may lie  
43  
44 195 in the variations in sepsis interventions <sup>[6,18]</sup>, a meta-analysis concluded that  
45  
46 196 individuals who are considered overweight or obese have a reduced adjusted mortality  
47  
48 197 when admitted to the ICU with sepsis or septic shock <sup>[8]</sup>. Recently another  
49  
50 198 meta-analysis also concluded that being overweight was associated with lower  
51  
52  
53  
54  
55  
56  
57  
58  
59  
60

1  
2  
3  
4 199 mortality (OR 0.87, 95% CI 0.77-0.97,  $p = 0.02$ ) compared with obese (OR 0.89, 95%  
5  
6 200 CI 0.72-1.10,  $p = 0.29$ ) and morbidly obese (OR 0.64, 95% CI 0.38-1.08,  $p = 0.09$ )  
7  
8 201 patients who did not exhibit significantly reduced mortality compared with normal  
9  
10 202 weight patients <sup>[19]</sup>. In a large and nationally representative sample of over 1,000  
11  
12 203 hospitals in the US, obesity was found to be significantly associated with a 16%  
13  
14 204 decrease in the odds of dying among sepsis patients who were hospitalized <sup>[20]</sup>.

15  
16  
17  
18 205 Underweight patients with sepsis may be more common in developing countries  
19  
20 206 than developed countries. In the present study, the percentages of underweight,  
21  
22 207 normal weight, overweight and obese patients were 18.4%, 55.3%, 20.1%, and 6.1%,  
23  
24 208 respectively, while those with sepsis in a study in Canada and the US represented  
25  
26 209 6.8%, 35.3%, 28.3%, and 29.0% <sup>[6]</sup>. Being underweight was found to be one of the  
27  
28 210 independent risk factors of mortality in a study on the correlation between surgical  
29  
30 211 site infection and mortality <sup>[10]</sup>. Furthermore, Lee et al <sup>[11]</sup> also reported that being  
31  
32 212 underweight was associated with mortality in patients with severe sepsis and septic  
33  
34 213 shock.

35  
36  
37  
38  
39  
40 214 Consequently, previous studies on sepsis have shown that overweight and obese  
41  
42 215 patients have a decreased risk for mortality, and underweight patients may have a  
43  
44 216 higher mortality. However, BMI has not been shown to be an independent factor for  
45  
46 217 clinical outcomes by multivariable analyses. In our cohort of medical patients with  
47  
48 218 sepsis, which mainly included the elderly and less obese patients, BMI was identified  
49  
50 219 as an independent factor for survival. The mechanism of the correlation between BMI  
51  
52 220 and mortality of sepsis is unclear. There are several potential reasons that could  
53  
54  
55  
56  
57  
58  
59  
60

1  
2  
3  
4 221 explain this. First, higher BMI resulted in more fat reserves, and patients could have a  
5  
6 222 greater capacity to cope with the inflammatory response during sepsis and  
7  
8 223 sepsis-associated acute lung injury <sup>[21-23]</sup>. Furthermore, they may be able to tolerate  
9  
10 224 extensive weight loss and dysfunction associated with critical illness <sup>[24]</sup>. Secondly, a  
11  
12  
13 225 higher BMI can lead to an increased level of lipoproteins. High-density lipoproteins  
14  
15 226 may not only bind and inactivate lipopolysaccharide (LPS) or other harmful bacterial  
16  
17  
18 227 products released during sepsis <sup>[25]</sup>, but also modulate adhesion molecule expression,  
19  
20 228 upregulate endothelial nitric oxide synthase, and counteract oxidative stress <sup>[26]</sup>.  
21  
22  
23 229 Thirdly, higher BMI can lead to increased adipose tissue deposition. Adipose tissue is  
24  
25 230 increasingly being considered as a functional endocrine organ and associated with  
26  
27  
28 231 increased renin-angiotensin system activity <sup>[27]</sup>. It appears to have protective  
29  
30 232 hemodynamic effects during sepsis and may decrease the need for fluid or  
31  
32  
33 233 vasopressor support <sup>[18,28]</sup>. This may be the reason why the percentages of patients  
34  
35 234 with hypotension and with septic shock in the four groups decreased as BMI  
36  
37  
38 235 increased in the present study.

39  
40 236 It should be noted that in the majority of our patients (73.6%) sepsis was  
41  
42 237 associated with pulmonary infection, a much higher percentage as compared to other  
43  
44  
45 238 studies. Ranieri et al <sup>[29]</sup> reported that the primary sites of infection in adults with  
46  
47  
48 239 septic shock were lung (43.9%), abdomen (30.0%), urinary tract (12.3%), skin (5.5%)  
49  
50 240 and other sites (8.3%). Scheer et al <sup>[30]</sup> found that the most common primary site of  
51  
52  
53 241 infection was different between medical and surgical patients. In medical patients,  
54  
55 242 lung was the most common primary site (42.0%-56.7%), while it was abdomen

1  
2  
3  
4 243 (48.4%-64.4%) in surgical patients.  
5

6 244 There were several limitations to our study. Firstly, the BMI of our patients  
7  
8 245 ranged from 12.11 to 32.46. Morbidly obese patients were not included in the study,  
9  
10 246 although morbidly obese patients are not common in this country. Secondly, the  
11  
12 247 present study used weight ascertained at ICU admission, rather than the patient's true  
13  
14 248 outpatient weight. This practice may misclassify the BMI category in as many as  
15  
16 249 21.9% of patients due to lack of fluid balance adjustment <sup>[31]</sup>. Lastly, although 178  
17  
18 250 patients were included in this prospective study, it was still difficult to avoid  
19  
20 251 sample-related bias, because a large proportion of our patients were older than 65  
21  
22 252 years.  
23  
24  
25  
26  
27

## 28 253 **Conclusions**

29  
30 254 To our knowledge, this is the first prospective cohort study that focused on  
31  
32 255 medical patients with sepsis, showing that SOFA score, APACHE II score and BMI  
33  
34 256 were independent predictors of survival, and more importantly, underweight patients  
35  
36 257 were at higher risk of death.  
37  
38  
39

40 258

## 41 259 **Acknowledgements**

42  
43 260 Not applicable.  
44

45 261

## 46 262 **Authors' contributions**

47  
48 263 QTZ, YCS, YAZ designed the study. QTZ, YCS, NS, YAZ, and QBM coordinated  
49  
50 264 the study. MW, JZ, YLD, SL, and HXG were responsible for patient screening,  
51  
52  
53  
54  
55  
56

1  
2  
3  
4 265 enrollment, and follow-up. QTZ, MW, and YCS analyzed the data. QTZ drafted the  
5  
6 266 manuscript. YCS critically revised the manuscript. All authors had full access to all  
7  
8 267 study data, read and approved the final version of the manuscript.  
9

10  
11 268

### 12 13 269 **Funding**

14  
15  
16 270 None.  
17

18  
19 271

### 20 21 272 **Competing interests**

22  
23 273 None declared.  
24

25  
26 274

### 27 28 275 **Ethics approval and consent to participate**

29  
30 276 The study protocol was approved (approval number M2015021) by the ethics  
31  
32 277 committee of Peking University Third Hospital, Beijing, China. All patients or their  
33  
34 278 legally authorized representatives provided written informed consent to participate in  
35  
36 279 the study.  
37  
38  
39

40  
41 280

### 42 43 281 **Data sharing statement**

44  
45 282 No additional data are available.  
46

47  
48 283

### 49 50 284 **References**

- 51  
52 285 1. Singer M, Deutschman CS, Seymour CW, et al. The Third International Consensus  
53  
54 286 Definitions for Sepsis and Septic Shock (Sepsis-3). *JAMA* 2016;315:801-10.  
55  
56  
57

- 1  
2  
3  
4 287 2. Angus DC, van der Poll T. Severe sepsis and septic shock. *N Engl J Med* 2013;369:2063.  
5  
6 288 3. Bouza C, López-Cuadrado T, Saz-Parkinson Z, et al. Epidemiology and recent trends of  
7  
8 289 severe sepsis in Spain: a nationwide population-based analysis (2006-2011). *BMC Infect Dis*  
9  
10  
11 290 2014; 14:3863.  
12  
13 291 4. WHO classification of body mass index (BMI). [[http://apps.who.int/bmi/index.jsp?introPage=](http://apps.who.int/bmi/index.jsp?introPage=intro_3.html)  
14  
15 292 [intro\\_3.html](http://apps.who.int/bmi/index.jsp?introPage=intro_3.html)] Accessed on 2 March 2015.  
16  
17  
18 293 5. Wurzinger B, Dünser MW, Wohlmuth C, et al. The association between body-mass index and  
19  
20 294 patient outcome in septic shock: a retrospective cohort study. *Wien Klin Wochenschr* 2010;122:  
21  
22 295 31-6.  
23  
24  
25 296 6. Arabi YM, Dara SI, Tamim HM, et al. Clinical characteristics, sepsis interventions and  
26  
27 297 outcomes in the obese patients with septic shock: an international multicenter cohort study.  
28  
29 298 *Crit Care* 2013;17:R72.  
30  
31  
32 299 7. Prescott HC, Chang VW, O'Brien JM Jr, et al. Obesity and 1-year outcomes in older  
33  
34 300 Americans with severe sepsis. *Crit Care Med* 2014;42:1766-74.  
35  
36  
37 301 8. Pepper DJ, Sun J, Welsh J, et al. Increased body mass index and adjusted mortality in ICU  
38  
39 302 patients with sepsis or septic shock: a systematic review and meta-analysis. *Crit Care*  
40  
41 303 2016;20:181.  
42  
43  
44 304 9. Gaulton TG, Marshall MacNabb C, Mikkelsen ME, et al. A retrospective cohort study  
45  
46 305 examining the association between body mass index and mortality in severe sepsis. *Intern*  
47  
48 306 *Emerg Med* 2015;10:471-9.  
49  
50  
51 307 10. Giles KA, Hamdan AD, Pomposelli FB, et al. Body mass index: surgical site infections and  
52  
53 308 mortality after lower extremity bypass from the National Surgical Quality Improvement  
54  
55  
56  
57  
58  
59  
60



- 1  
2  
3  
4 309 Program 2005-2007. *Ann Vasc Surg* 2010;24:48-56.
- 5  
6 310 11. Lee SM, Kang JW, Jo YH, et al. Underweight is associated with mortality in patients with  
7  
8 311 severe sepsis and septic shock. *Intensive Care Med Exp* 2015; 3:A876.
- 9  
10  
11 312 12. Dellinger RP, Levy MM, Rhodes A, et al. Surviving sepsis campaign: international guidelines  
12  
13 313 for management of severe sepsis and septic shock: 2012. *Crit Care Med* 2013;41:580-637.
- 14  
15  
16 314 13. Rhodes A, Evans LE, Alhazzani W, et al. Surviving Sepsis Campaign: International  
17  
18 315 Guidelines for Management of Sepsis and Septic Shock: 2016. *Intensive Care Med* 2017;  
19  
20 316 43:304-77.
- 21  
22  
23 317 14. de Carvalho MA, Freitas FG, Silva Junior HT, et al. Mortality predictors in renal transplant  
24  
25 318 recipients with severe sepsis and septic shock. *PLoS One* 2014;9:e111610.
- 26  
27  
28 319 15. Innocenti F, Tozzi C, Donnini C, et al. SOFA score in septic patients: incremental prognostic  
29  
30 320 value over age, comorbidities, and parameters of sepsis severity. *Intern Emerg Med* 2017 Feb  
31  
32 321 10. Doi:10.1007/s11739-017-1629-5.[Epub ahead of print]
- 33  
34  
35 322 16. Song JE, Kim MH, Jeong WY, et al. Mortality Risk Factors for Patients with Septic  
36  
37 323 Shock after Implementation of the Surviving Sepsis Campaign Bundles. *Infect*  
38  
39 324 *Chemother* 2016;48:199-208.
- 40  
41  
42 325 17. Atamna A, Elis A, Gilady E, et al. How obesity impacts outcomes of infectious diseases. *Eur*  
43  
44 326 *J Clin Microbiol Infect Dis* 2017; 36:585-91.
- 45  
46  
47 327 18. Taylor SP, Karvetski CH, Templin MA, et al. Initial fluid resuscitation following adjusted  
48  
49 328 body weight dosing is associated with improved mortality in obese patients with suspected  
50  
51 329 septic shock. *J Crit Care* 2018;43:7-12.
- 52  
53  
54  
55 330 19. Wang S, Liu X, Chen Q, et al. The role of increased body mass index in outcomes of sepsis: a

- 1  
2  
3  
4 331 systematic review and meta-analysis. *BMC Anesthesiol* 2017;17:118.  
5  
6 332 20. Nguyen AT, Tsai CL, Hwang LY, et al. Obesity and Mortality, Length of Stay and Hospital  
7  
8 333 Cost among Patients with Sepsis: A Nationwide Inpatient Retrospective Cohort Study. *PLoS*  
9  
10 334 *One* 2016; 11:e0154599.  
11  
12  
13 335 21. Stapleton RD, Dixon AE, Parsons PE, et al. The association between BMI and plasma  
14  
15 336 cytokine levels in patients with acute lung injury. *Chest* 2010;138:568-77.  
16  
17  
18 337 22. Stapleton RD, Suratt BT. Obesity and nutrition in acute respiratory distress syndrome. *Clin*  
19  
20 338 *Chest Med* 2014;35:655-71.  
21  
22  
23 339 23. Zampieri FG, Jacob V, Barbeiro HV, et al. Influence of Body Mass Index on Inflammatory  
24  
25 340 Profile at Admission in Critically Ill Septic Patients. *Int J Inflam* 2015; 2015:734857.  
26  
27  
28 341 24. Herridge MS, Cheung AM, Tansey CM, et al. One-year outcomes in survivors of the acute  
29  
30 342 respiratory distress syndrome. *N Engl J Med* 2003;348:683-93.  
31  
32  
33 343 25. Wu A, Hinds CJ, Thiemermann C. High-density lipoproteins in sepsis and septic shock:  
34  
35 344 metabolism, actions, and therapeutic applications. *Shock* 2004;21:210-21.  
36  
37  
38 345 26. Murch O, Collin M, Hinds CJ, et al. Lipoproteins in inflammation and sepsis. I. Basic science.  
39  
40 346 *Intensive Care Med* 2007; 33:13-24.  
41  
42  
43 347 27. McGown C, Bierendinc A, Younossi ZM. Adipose tissue as an endocrine organ. *Clin Liver*  
44  
45 348 *Dis* 2014;18:41-58.  
46  
47  
48 349 28. Salgado DR, Rocco JR, Silva E, et al. Modulation of the renin-angiotensin-aldosterone  
49  
50 350 system in sepsis: a new therapeutic approach? *Expert Opin Ther Targets* 2010; 14:11-20.  
51  
52  
53 351 29. Ranieri VM, Thompson BT, Barie PS, et al. Drotrecogin alfa (activated) in adults with septic  
54  
55 352 shock. *N Engl J Med* 2012;366:2055-64.  
56  
57  
58  
59  
60

- 1  
2  
3  
4 353 30. Scheer CS, Fuchs C, Kuhn SO, et al. Quality Improvement Initiative for Severe  
5  
6 354 Sepsis and Septic Shock Reduces 90-Day Mortality: A 7.5-Year Observational Study. *Crit*  
7  
8 355 *Care Med* 2017;45:241-52.  
9  
10  
11 356 31. O'Brien JM Jr, Philips GS, Ali NA, et al. The association between body mass index, processes  
12  
13 357 of care, and outcomes from mechanical ventilation: a prospective cohort study.  
14  
15  
16 358 *Crit Care Med* 2012;40:1456-63.  
17  
18 359  
19  
20  
21 360  
22  
23 361  
24  
25 362  
26  
27  
28 363  
29  
30 364  
31  
32 365  
33  
34 366  
35  
36 367  
37  
38 368  
39  
40 369  
41  
42 370  
43  
44 371  
45  
46 372  
47  
48 373  
49  
50 374  
51  
52  
53  
54  
55  
56  
57  
58  
59  
60

375 **Table 1. Comparison of demographics and clinical data between groups defined by clinical**  
 376 **outcome in 178 patients with sepsis**

| Characteristics                      | Survivors<br>(n=104) | Non survivors<br>(n=74) | p value |
|--------------------------------------|----------------------|-------------------------|---------|
| Age (year)                           | 78.0 (60.0-84.0)     | 78.0 (69.0-84.0)        | 0.291   |
| Males                                | 67 (64.4)            | 49 (66.2)               | 0.805   |
| Body mass index (kg/m <sup>2</sup> ) | 23.2 (20.4-26.1)     | 21.7 (18.4-24.2)        | 0.006   |
| <b>Comorbidities</b>                 |                      |                         |         |
| COPD                                 | 23 (22.1)            | 9 (12.2)                | 0.088   |
| Diabetes mellitus                    | 26 (25.0)            | 21 (28.4)               | 0.614   |
| Hypertension                         | 47 (45.2)            | 31 (41.9)               | 0.662   |
| Cerebrovascular disease              | 30 (28.8)            | 15 (20.3)               | 0.194   |
| Neoplasm                             | 18 (17.3)            | 12 (16.2)               | 0.848   |
| Liver disease                        | 5 (4.8)              | 4 (5.4)                 | 1.000   |
| Heart failure                        | 20 (19.2)            | 14 (18.9)               | 0.958   |
| Chronic renal failure                | 18 (17.3)            | 11 (14.9)               | 0.664   |
| Smoking (pack years)                 | 0 (0-30.0)           | 0 (0-16.3)              | 0.509   |
| <b>Primary site of infection</b>     |                      |                         |         |
| Lung                                 | 77 (74.0)            | 54 (73.0)               | 0.874   |
| Abdomen                              | 10 (9.6)             | 5 (6.8)                 | 0.499   |
| Urinary tract                        | 7 (6.7)              | 6 (8.1)                 | 0.728   |
| Gastrointestinal tract               | 7 (6.7)              | 5 (6.8)                 | 1.000   |

|                                              |                     |                    |        |
|----------------------------------------------|---------------------|--------------------|--------|
| Other site                                   | 3 (2.9)             | 4 (5.4)            | 0.452  |
| <b>Community-acquired infection</b>          | 85 (81.7)           | 50 (67.6)          | 0.030  |
| <b>Hypotension</b>                           | 22 (21.2)           | 41 (55.4)          | <0.001 |
| <b>Lactate level (mmol/L)</b>                | 1.8 (1.0-3.4)       | 2.7 (1.5-5.7)      | 0.001  |
| <b>Oliguria</b>                              | 8 (7.7)             | 16 (21.6)          | 0.007  |
| <b>PaO<sub>2</sub>/FiO<sub>2</sub>(mmHg)</b> | 198.5 (119.3-287.5) | 152.5 (99.6-210.3) | 0.006  |
| <b>Serum Creatinine (μmol/L)</b>             | 97.0 (68.3-176.3)   | 108.5 (64.0-194.3) | 0.868  |
| <b>Total bilirubin (μmol/mL)</b>             | 13.1 (9.9-22.3)     | 18.0 (12.5-32.8)   | 0.015  |
| <b>Platelets (×10<sup>9</sup>/L)</b>         | 161.0 (95.8-232.5)  | 123.0 (75.0-204.3) | 0.067  |
| <b>INR</b>                                   | 1.2 (1.0-1.4)       | 1.3 (1.1-1.6)      | 0.015  |
| <b>Glasgow coma scale</b>                    | 15.0 (10.0-15.0)    | 13.0 (10.0-15.0)   | 0.117  |
| <b>SOFA score</b>                            | 5.0 (4.0-7.0)       | 9.0 (7.0-11.0)     | <0.001 |
| <b>APACHE II score</b>                       | 16.0 (12.0-22.0)    | 21.0 (17.0-30.0)   | <0.001 |
| <b>Septic shock</b>                          | 21 (20.2)           | 38 (51.4)          | <0.001 |
| <b>Non-invasive ventilation</b>              | 28 (26.9)           | 24 (32.4)          | 0.426  |
| <b>Intubated</b>                             | 36 (34.6)           | 43 (58.1)          | 0.002  |
| <b>Positive blood culture</b>                | 19 (18.3)           | 19 (25.7)          | 0.235  |
| <b>Length of ICU stay (days)</b>             | 12.0 (6.0-22.0)     | 12.0 (3.0-25.0)    | 0.521  |
| <b>Length of hospital stay (days)</b>        | 18.0 (10.0-30.0)    | 13.0 (3.0-25.0)    | 0.009  |

377 Data are presented as n (%) or median (interquartile range) unless stated otherwise. COPD: Chronic obstructive pulmonary disease; INR: International

378 normalized ratio; SOFA: Sequential organ failure assessment; APACHE: Acute physiology and chronic health evaluation.

379

380 **Table 2. Risk factors for 90-day mortality of patients with sepsis or septic shock by Cox**  
 381 **regression analysis**

| Variables                                 | Hazard ratio (95% Confidence interval) | p value |
|-------------------------------------------|----------------------------------------|---------|
| Body mass index (kg/m <sup>2</sup> )      | 0.940 (0.889-0.994)                    | 0.029   |
| Hypotension                               | 0.781 (0.229-2.670)                    | 0.694   |
| Lactate level (mmol/L)                    | 1.018 (0.943-1.098)                    | 0.648   |
| Oliguria                                  | 1.288 (0.715-2.321)                    | 0.399   |
| PaO <sub>2</sub> /FiO <sub>2</sub> (mmHg) | 1.000 (0.997-1.002)                    | 0.933   |
| Septic shock                              | 1.075 (0.320-3.615)                    | 0.907   |
| SOFA score                                | 1.229 (1.123-1.345)                    | <0.001  |
| APACHE II score                           | 1.050 (1.022-1.080)                    | <0.001  |
| Intubated                                 | 1.511 (0.931-2.452)                    | 0.095   |

382 SOFA: Sequential organ failure assessment; APACHE: Acute physiology and chronic health evaluation.

383

384

385

386

387

388

389

390

391

392 **Table 3. Comparison of demographics and clinical data among groups defined by body mass**  
 393 **index in patients with sepsis**

| <b>Characteristics</b>           | <b>Underweight</b><br>(n=33) | <b>Normal</b><br>(n=98) | <b>Overweight</b><br>(n=36) | <b>Obese</b><br>(n=11) | <b>p value</b> |
|----------------------------------|------------------------------|-------------------------|-----------------------------|------------------------|----------------|
| <b>Age (years)</b>               | 79.0 (69.0-86.0)             | 78.0 (67.0-84.0)        | 73.0 (57.0-83.0)            | 77.0 (71.0-86.0)       | 0.162          |
| <b>Males</b>                     | 24 (72.7)                    | 70 (71.4)               | 20 (55.6)                   | 2 (18.2)               | 0.002          |
| <b>Comorbidities</b>             |                              |                         |                             |                        |                |
| COPD                             | 8(24.2)                      | 21 (21.4)               | 0                           | 3 (27.3)               | 0.017          |
| Diabetes mellitus                | 8 (24.2)                     | 25 (25.5)               | 9 (25.0)                    | 5 (45.5)               | 0.530          |
| Hypertension                     | 14 (42.4)                    | 38 (38.8)               | 19 (52.8)                   | 7 (63.6)               | 0.265          |
| Cerebrovascular disease          | 10 (30.3)                    | 24 (24.5)               | 11 (30.6)                   | 0                      | 0.193          |
| Neoplasm                         | 7 (21.2)                     | 14 (14.3)               | 8 (22.2)                    | 1 (9.1)                | 0.547          |
| Liver disease                    | 2 (6.1)                      | 5 (5.1)                 | 2 (5.6)                     | 0                      | 0.879          |
| Heart failure                    | 8 (24.2)                     | 17 (17.3)               | 5 (13.9)                    | 4 (36.4)               | 0.319          |
| Chronic renal failure            | 5 (15.2)                     | 14 (14.3)               | 7 (19.4)                    | 3 (27.3)               | 0.669          |
| <b>Smoking (pack-years)</b>      | 0 (0-20.5)                   | 0 (0-30.0)              | 0 (0-3.0)                   | 0 (0-30.0)             | 0.561          |
| <b>Primary site of infection</b> |                              |                         |                             |                        |                |
| Lung                             | 27 (81.8)                    | 69 (70.4)               | 27 (75.0)                   | 8 (72.7)               | 0.637          |
| Abdomen                          | 2 (6.1)                      | 9 (9.2)                 | 3 (8.3)                     | 1 (9.1)                | 0.956          |
| Urinary tract                    | 1 (3.0)                      | 9 (9.2)                 | 2 (5.6)                     | 1 (9.1)                | 0.656          |
| Gastrointestinal tract           | 2 (6.1)                      | 6 (6.1)                 | 3 (8.3)                     | 1 (9.1)                | 0.955          |
| Other site                       | 1 (3.0)                      | 5 (5.1)                 | 1 (2.8)                     | 0                      | 0.800          |

|                                               |                    |                    |                     |                    |       |
|-----------------------------------------------|--------------------|--------------------|---------------------|--------------------|-------|
| <b>Community-acquired infection</b>           | 25 (75.8)          | 76 (77.6)          | 26 (72.2)           | 8 (72.7)           | 0.925 |
| <b>Hypotension</b>                            | 19 (57.6)          | 34 (34.7)          | 9 (25.0)            | 1 (9.1)            | 0.007 |
| <b>Lactate level (mmol/L)</b>                 | 2.4 (1.6-7.2)      | 2.1 (1.0-4.3)      | 1.6 (1.2-3.3)       | 1.9 (0.6-2.9)      | 0.201 |
| <b>Oliguria</b>                               | 8 (24.2)           | 13 (13.3)          | 3 (8.3)             | 0                  | 0.121 |
| <b>PaO<sub>2</sub>/FiO<sub>2</sub> (mmHg)</b> | 180.0(113.5-251.0) | 164.5(102.3-240.5) | 188.0(140.5-268.5)  | 215.0(153.0-300.0) | 0.340 |
| <b>Serum Creatinine (µmol/L)</b>              | 89.0 (57.0-127.0)  | 118.5 (72.5-190.5) | 91.0 (60.0-212.5)   | 86.0 (56.0-112.0)  | 0.136 |
| <b>Total bilirubin (µmol/mL)</b>              | 18.0 (10.1-33.1)   | 14.4 (10.1-28.4)   | 17.2 (12.2-26.3)    | 15.2 (11.3-20.0)   | 0.819 |
| <b>Platelets (×10<sup>9</sup>/L)</b>          | 139.0 (75.0-213.0) | 147.0 (86.0-209.8) | 182.5 (128.3-253.8) | 115.0 (49.0-144.0) | 0.056 |
| <b>INR</b>                                    | 1.3 (1.1-1.6)      | 1.2 (1.0-1.5)      | 1.2 (1.1-1.3)       | 1.1 (1.0-1.2)      | 0.269 |
| <b>Glasgow coma scale</b>                     | 13.0 (10.0-15.0)   | 15.0 (12.0-15.0)   | 15.0 (11.0-15.0)    | 13.0 (10.0-15.0)   | 0.761 |
| <b>SOFA score</b>                             | 8.0 (5.0-11.0)     | 7.0 (5.0-9.0)      | 6.0 (4.0-8.0)       | 5.0 (5.0-8.0)      | 0.382 |
| <b>APACHE II score</b>                        | 18.0 (16.0-24.0)   | 19.0 (13.0-25.0)   | 18.0 (13.0-22.0)    | 14.0 (9.0-17.0)    | 0.060 |
| <b>Septic shock</b>                           | 19 (57.6)          | 30 (30.6)          | 9 (25.0)            | 1(9.1)             | 0.004 |
| <b>Non-invasive ventilation</b>               | 7 (21.2)           | 30 (30.6)          | 10 (27.8)           | 5 (45.5)           | 0.466 |
| <b>Intubated</b>                              | 19 (57.6)          | 43 (43.9)          | 13 (36.1)           | 4 (36.4)           | 0.305 |
| <b>Positive blood culture</b>                 | 7 (21.2)           | 24 (24.5)          | 4 (11.1)            | 3 (27.3)           | 0.383 |
| <b>Length of ICU stay (days)</b>              | 10.0 (4.0-25.0)    | 13.0 (7.0-25.0)    | 11.0 (4.0-19.0)     | 9.0(6.0-13.0)      | 0.461 |
| <b>Length of hospital stay (days)</b>         | 13.0 (4.0-29.0)    | 16.0 (10.0-28.0)   | 16.0 (8.0-32.0)     | 13.0(8.0-20.0)     | 0.813 |
| <b>In-hospital mortality</b>                  | 20 (60.6)          | 41 (41.8)          | 11 (30.6)           | 2 (18.2)           | 0.027 |
| <b>90-day mortality</b>                       | 22 (66.7)          | 47 (48.0)          | 13 (36.1)           | 2 (18.2)           | 0.015 |

394 Data are presented as n (%) or median (interquartile range). COPD: Chronic obstructive pulmonary disease; INR: International normalized ratio; SOFA:

395 Sequential organ failure assessment; APACHE: Acute physiology and chronic health evaluation.



1  
2  
3  
4 396  
5  
6 397  
7  
8 398  
9  
10  
11 399  
12  
13  
14  
15  
16  
17  
18  
19  
20  
21  
22  
23  
24  
25  
26  
27  
28  
29  
30  
31  
32  
33  
34  
35  
36  
37  
38  
39  
40  
41  
42  
43  
44  
45  
46  
47  
48  
49  
50  
51  
52  
53  
54  
55  
56  
57  
58  
59  
60

**Fig 1. Kaplan-Meier survival plot for 90-day survival of underweight, normal weight, overweight, and obese patients with sepsis.**

For peer review only

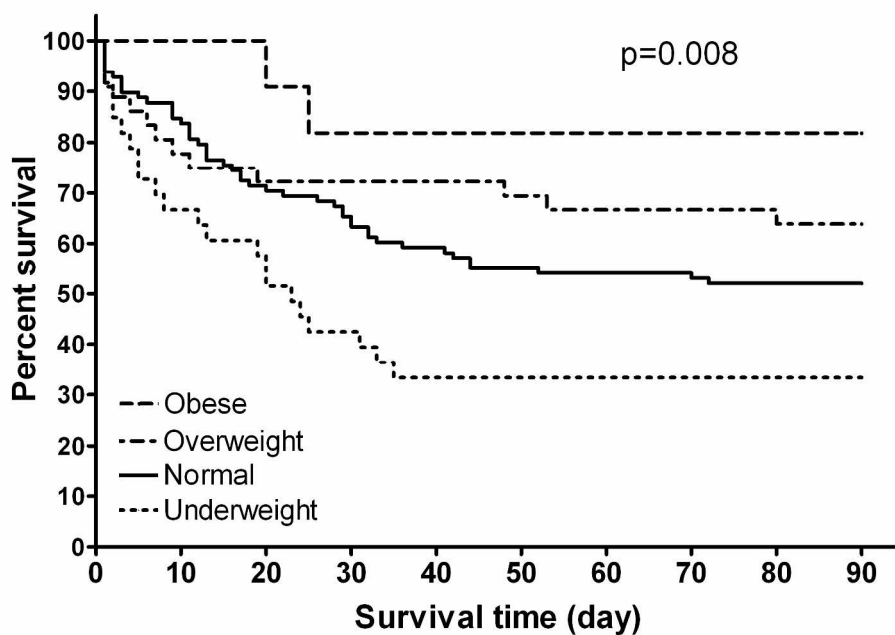

Fig 1. Kaplan-Meier survival plot for 90-day survival of underweight, normal weight, overweight, and obese patients with sepsis.

246x167mm (300 x 300 DPI)

**STROBE 2007 (v4) Statement—Checklist of items that should be included in reports of cohort studies**

| Section/Topic             | Item # | Recommendation                                                                                                                                                                       | Reported on page # |
|---------------------------|--------|--------------------------------------------------------------------------------------------------------------------------------------------------------------------------------------|--------------------|
| Title and abstract        | 1      | (a) Indicate the study’s design with a commonly used term in the title or the abstract                                                                                               | 1                  |
|                           |        | (b) Provide in the abstract an informative and balanced summary of what was done and what was found                                                                                  | 2,3                |
| <b>Introduction</b>       |        |                                                                                                                                                                                      |                    |
| Background/rationale      | 2      | Explain the scientific background and rationale for the investigation being reported                                                                                                 | 4                  |
| Objectives                | 3      | State specific objectives, including any prespecified hypotheses                                                                                                                     | 4                  |
| <b>Methods</b>            |        |                                                                                                                                                                                      |                    |
| Study design              | 4      | Present key elements of study design early in the paper                                                                                                                              | 5                  |
| Setting                   | 5      | Describe the setting, locations, and relevant dates, including periods of recruitment, exposure, follow-up, and data collection                                                      | 5                  |
| Participants              | 6      | (a) Give the eligibility criteria, and the sources and methods of selection of participants. Describe methods of follow-up                                                           | 5,6                |
|                           |        | (b) For matched studies, give matching criteria and number of exposed and unexposed                                                                                                  | N/A                |
| Variables                 | 7      | Clearly define all outcomes, exposures, predictors, potential confounders, and effect modifiers. Give diagnostic criteria, if applicable                                             | 5,6                |
| Data sources/ measurement | 8*     | For each variable of interest, give sources of data and details of methods of assessment (measurement). Describe comparability of assessment methods if there is more than one group | 6,7                |
| Bias                      | 9      | Describe any efforts to address potential sources of bias                                                                                                                            | N/A                |
| Study size                | 10     | Explain how the study size was arrived at                                                                                                                                            | N/A                |
| Quantitative variables    | 11     | Explain how quantitative variables were handled in the analyses. If applicable, describe which groupings were chosen and why                                                         | 6                  |
| Statistical methods       | 12     | (a) Describe all statistical methods, including those used to control for confounding                                                                                                | 6,7                |
|                           |        | (b) Describe any methods used to examine subgroups and interactions                                                                                                                  | 6,7                |
|                           |        | (c) Explain how missing data were addressed                                                                                                                                          | N/A                |
|                           |        | (d) If applicable, explain how loss to follow-up was addressed                                                                                                                       | N/A                |
|                           |        | (e) Describe any sensitivity analyses                                                                                                                                                | N/A                |
| <b>Results</b>            |        |                                                                                                                                                                                      |                    |

|                          |     |                                                                                                                                                                                                              |         |
|--------------------------|-----|--------------------------------------------------------------------------------------------------------------------------------------------------------------------------------------------------------------|---------|
| Participants             | 13* | (a) Report numbers of individuals at each stage of study—eg numbers potentially eligible, examined for eligibility, confirmed eligible, included in the study, completing follow-up, and analysed            | 7       |
|                          |     | (b) Give reasons for non-participation at each stage                                                                                                                                                         | N/A     |
|                          |     | (c) Consider use of a flow diagram                                                                                                                                                                           | N/A     |
| Descriptive data         | 14* | (a) Give characteristics of study participants (eg demographic, clinical, social) and information on exposures and potential confounders                                                                     | 7       |
|                          |     | (b) Indicate number of participants with missing data for each variable of interest                                                                                                                          | N/A     |
|                          |     | (c) Summarise follow-up time (eg, average and total amount)                                                                                                                                                  | 7       |
| Outcome data             | 15* | Report numbers of outcome events or summary measures over time                                                                                                                                               | 7       |
| Main results             | 16  | (a) Give unadjusted estimates and, if applicable, confounder-adjusted estimates and their precision (eg, 95% confidence interval). Make clear which confounders were adjusted for and why they were included | 8,18-22 |
|                          |     | (b) Report category boundaries when continuous variables were categorized                                                                                                                                    | 6       |
|                          |     | (c) If relevant, consider translating estimates of relative risk into absolute risk for a meaningful time period                                                                                             | N/A     |
| Other analyses           | 17  | Report other analyses done—eg analyses of subgroups and interactions, and sensitivity analyses                                                                                                               | N/A     |
| <b>Discussion</b>        |     |                                                                                                                                                                                                              |         |
| Key results              | 18  | Summarise key results with reference to study objectives                                                                                                                                                     | 9-11    |
| <b>Limitations</b>       |     |                                                                                                                                                                                                              |         |
| Interpretation           | 20  | Give a cautious overall interpretation of results considering objectives, limitations, multiplicity of analyses, results from similar studies, and other relevant evidence                                   | 12      |
| Generalisability         | 21  | Discuss the generalisability (external validity) of the study results                                                                                                                                        | 12      |
| <b>Other information</b> |     |                                                                                                                                                                                                              |         |
| Funding                  | 22  | Give the source of funding and the role of the funders for the present study and, if applicable, for the original study on which the present article is based                                                | 13      |

\*Give information separately for cases and controls in case-control studies and, if applicable, for exposed and unexposed groups in cohort and cross-sectional studies.

**Note:** An Explanation and Elaboration article discusses each checklist item and gives methodological background and published examples of transparent reporting. The STROBE checklist is best used in conjunction with this article (freely available on the Web sites of PLoS Medicine at <http://www.plosmedicine.org/>, Annals of Internal Medicine at <http://www.annals.org/>, and Epidemiology at <http://www.epidem.com/>). Information on the STROBE Initiative is available at [www.strobe-statement.org](http://www.strobe-statement.org).

# BMJ Open

## The impact of body mass index on survival of medical patients with sepsis: a prospective cohort study in a university hospital in China

|                                 |                                                                                                                                                                                                                                                                                                                                                                                                                                                                                                                                                                                                                                                                                                                                                                                                                                                                                                                                       |
|---------------------------------|---------------------------------------------------------------------------------------------------------------------------------------------------------------------------------------------------------------------------------------------------------------------------------------------------------------------------------------------------------------------------------------------------------------------------------------------------------------------------------------------------------------------------------------------------------------------------------------------------------------------------------------------------------------------------------------------------------------------------------------------------------------------------------------------------------------------------------------------------------------------------------------------------------------------------------------|
| Journal:                        | <i>BMJ Open</i>                                                                                                                                                                                                                                                                                                                                                                                                                                                                                                                                                                                                                                                                                                                                                                                                                                                                                                                       |
| Manuscript ID                   | bmjopen-2018-021979.R1                                                                                                                                                                                                                                                                                                                                                                                                                                                                                                                                                                                                                                                                                                                                                                                                                                                                                                                |
| Article Type:                   | Research                                                                                                                                                                                                                                                                                                                                                                                                                                                                                                                                                                                                                                                                                                                                                                                                                                                                                                                              |
| Date Submitted by the Author:   | 12-Apr-2018                                                                                                                                                                                                                                                                                                                                                                                                                                                                                                                                                                                                                                                                                                                                                                                                                                                                                                                           |
| Complete List of Authors:       | Zhou, Qingtao; Peking University Third Hospital, Department of respiratory and critical care medicine<br>Wang, Meng; Peking University Third Hospital, Department of respiratory and critical care medicine<br>Li, Shuo; Peking University Third Hospital, Emergency Department<br>Zhang, Jing; Peking University Third Hospital, Department of respiratory and critical care medicine<br>Ma, Qingbian; Peking University Third Hospital, Emergency Department<br>Ding, Yanling; Peking University Third Hospital, Department of respiratory and critical care medicine<br>Ge, Hongxia; Peking University Third Hospital, Emergency Department<br>Shen, Ning; Peking University Third Hospital, Department of respiratory and critical care medicine<br>Zheng, Yaan; Peking University Third Hospital, Emergency Department<br>Sun, Yongchang; Peking University Third Hospital, Department of respiratory and critical care medicine |
| <b>Primary Subject Heading</b>: | Intensive care                                                                                                                                                                                                                                                                                                                                                                                                                                                                                                                                                                                                                                                                                                                                                                                                                                                                                                                        |
| Secondary Subject Heading:      | Infectious diseases                                                                                                                                                                                                                                                                                                                                                                                                                                                                                                                                                                                                                                                                                                                                                                                                                                                                                                                   |
| Keywords:                       | Adult intensive & critical care < INTENSIVE & CRITICAL CARE, INFECTIOUS DISEASES, THORACIC MEDICINE                                                                                                                                                                                                                                                                                                                                                                                                                                                                                                                                                                                                                                                                                                                                                                                                                                   |
|                                 |                                                                                                                                                                                                                                                                                                                                                                                                                                                                                                                                                                                                                                                                                                                                                                                                                                                                                                                                       |

SCHOLARONE™  
Manuscripts

1  
2  
3  
4 **1 The impact of body mass index on survival of medical patients with sepsis: a**  
5  
6 **2 prospective cohort study in a university hospital in China**  
7

8  
9  
3

10  
11 4 Qingtao Zhou<sup>1</sup>, Meng Wang<sup>1</sup>, Shuo Li<sup>2</sup>, Jing Zhang<sup>1</sup>, Qingbian Ma<sup>2</sup>, Yanling Ding<sup>1</sup>,  
12  
13 5 Hongxia Ge<sup>2</sup>, Ning Shen<sup>1</sup>, Yaan Zheng<sup>2</sup>, Yongchang Sun<sup>1\*</sup>  
14

15  
16  
6

17  
18 7 <sup>1</sup> Department of Respiratory and Critical Care Medicine, Peking University Third  
19  
20 8 Hospital, Beijing, China.  
21

22  
23 9 <sup>2</sup> Emergency Department, Peking University Third Hospital, Beijing, China.  
24

25  
26  
10

27  
28 11 \***Corresponding author:** Yongchang Sun, Department of Respiratory and Critical  
29  
30 12 Care Medicine, Peking University Third Hospital, 49 North Garden Road, Haidian  
31  
32 13 District, Beijing 100191, China. Email: suny@bjmu.edu.cn  
33

34  
35  
14

36  
37  
15

38  
39  
16

40  
41  
17

42  
43  
18

44  
45  
19

46  
47  
20

48  
49  
21

50  
51  
22

1  
2  
3  
4  
5  
6  
7  
8  
9  
10  
11  
12  
13  
14  
15  
16  
17  
18  
19  
20  
21  
22  
23 **Abstract**

24 **Objective** To evaluate the impact of body mass index (BMI) on survival of a Chinese  
25 cohort of medical patients with sepsis.

26 **Design** A single-center prospective cohort study conducted from May 2015 to April  
27 2017.

28 **Setting** A tertiary care university hospital in China.

29 **Participants** 178 patients with sepsis admitted to the medical ICU were included.

30 **Main outcome measures** The primary outcome was 90-day mortality. The secondary  
31 outcomes were in-hospital mortality, length of ICU stay, and length of hospital stay.

32 **Results** The median age (interquartile range) of the patients was 78 (66-84) years.  
33 The 90-day mortality was 47.2%. The in-hospital mortality was 41.6%, and the length  
34 of ICU stay and hospital stay were 12 (5-22) and 15 (9-28) days, respectively. Cox  
35 proportional hazard regression analysis identified that sequential organ failure  
36 assessment (SOFA) score (HR = 1.229,  $p < 0.001$ ), APACHE II score (HR = 1.050,  $p$   
37  $< 0.001$ ) and BMI (HR = 0.940,  $p = 0.029$ ) were all independent predictors of the  
38 90-day mortality. Patients were divided into four groups based on BMI [underweight  
39 33 (18.5%), normal 98 (55.1%), overweight 36 (20.2%), and obese 11 (6.2%)]. The  
40 percentage of males (72.7%, 71.4%, 55.6%, and 18.2%,  $p = 0.002$ ), chronic  
41 obstructive pulmonary disease (24.2%, 21.4%, 0, and 27.3%,  $p = 0.017$ ), hypotension  
42 (57.6%, 34.7%, 25.0%, and 9.1%,  $p = 0.007$ ), septic shock (57.6%, 30.6%, 25.0%,  
43 and 9.1%,  $p = 0.004$ ), in-hospital mortality (60.6%, 41.8%, 30.6%, and 18.2%,  $p =$   
44 0.027) and 90-day mortality (66.7%, 48.0%, 36.1%, and 18.2%,  $p = 0.015$ ) were

1  
2  
3  
4 45 statistically different among the four groups. Differences in survival among the four  
5  
6 46 groups were demonstrated by Kaplan-Meier survival analysis ( $p = 0.008$ ).

7  
8 47 **Conclusions** BMI was an independent factor associated with survival in a Chinese  
9  
10  
11 48 cohort of medical patients with sepsis, patients with lower BMI having a higher risk  
12  
13 49 of death.

14  
15  
16 50  
17  
18 51 **Key words:** Sepsis; Septic shock; Body mass index; Critical care; Mortality  
19  
20  
21 52

### 22 23 53 **Strengths and limitations of this study**

24  
25 54 Our prospective observational cohort study was focused on medical patients with  
26  
27  
28 55 sepsis and conducted at a university hospital in China.

29  
30 56 The impact of BMI on 90-day survival of medical patients with sepsis was evaluated  
31  
32  
33 57 by Cox proportional hazard regression analysis and Kaplan-Meier survival analysis.

34  
35 58 Our analyses were limited by the use of weight ascertained at ICU admission, rather  
36  
37  
38 59 than the patient's true outpatient weight.  
39  
40  
41 60

42  
43 61

44  
45 62

46  
47 63

48  
49 64

50  
51 65

52  
53 66  
54  
55  
56  
57  
58  
59  
60



## 67 **Introduction**

68 Sepsis is a major cause of morbidity and mortality worldwide <sup>[1]</sup>. Of these  
69 patients, half are treated in the intensive care unit (ICU) <sup>[2]</sup>. In a national  
70 population-based study of sepsis in Spain, medical diagnostic categories were the  
71 majority of causes in patients who developed sepsis, while only 26% of surgical  
72 patients developed sepsis <sup>[3]</sup>.

73 Body mass index (BMI) is a simple index of weight-for-height that is commonly  
74 used to classify whether adults are underweight, overweight and obese <sup>[4]</sup>. Several  
75 studies have examined the effects of BMI on mortality with conflicting conclusions.  
76 Lower mortality in the obese has been observed in some studies <sup>[5-9]</sup>, but some  
77 researchers believe that the true paradox may lie in the variations in sepsis  
78 interventions, such as the administration of resuscitation fluids and antimicrobial  
79 therapy <sup>[6]</sup>. In other studies, morbidly obese and underweight patients have been  
80 shown to be associated with higher mortality <sup>[10,11]</sup>. Thus, the impact of BMI on  
81 survival of patients with sepsis is still controversial <sup>[12, 13]</sup>.

82 As the relationship between BMI and clinical outcomes of sepsis is complex,  
83 which may be related partly to differences in patient characteristics, we therefore set  
84 out to evaluate prospectively the impact of BMI on survival in a cohort of medical  
85 patients with sepsis admitted to the medical ICU in a university hospital.

86

## 87 **Patients and Methods**

### 88 **Design**

1  
2  
3  
4 89 This was a prospective cohort study, which was conducted in the medical ICU of  
5  
6 90 a university-affiliated urban teaching hospital in China from May 2015 to April 2017.  
7

## 8 91 **Subjects**

9  
10 92 Sepsis was defined as the presence (probable or documented) of infection  
11  
12 93 together with systemic manifestations of infection<sup>[14]</sup>. Hospitalized patients admitted  
13  
14 94 to the medical ICU with sepsis acquired in the community or in a hospital were  
15  
16 95 eligible for the study if they met any of the following criteria of severe sepsis<sup>[14]</sup>: (1)  
17  
18 96 sepsis-induced hypotension, (2) lactate above upper laboratory level limits  
19  
20 97 (1.5mmol/L in this study), (3) urine output <0.5 mL Kg<sup>-1</sup> h<sup>-1</sup> for more than 2 h despite  
21  
22 98 adequate fluid resuscitation, (4) acute lung injury with Pao<sub>2</sub>/Fio<sub>2</sub><250 in the absence  
23  
24 99 of pneumonia as infection source, (5) acute lung injury with Pao<sub>2</sub>/Fio<sub>2</sub> <200 in the  
25  
26 100 presence of pneumonia as infection source, (6) creatinine >2.0 mg/dL (176.8 μmol/L),  
27  
28 101 (7) bilirubin >2mg/dL (34.2 μmol/L), (8) platelet count <100,000 μL, and (9)  
29  
30 102 coagulopathy (international normalized ratio >1.5).  
31  
32  
33  
34  
35  
36  
37

38 103 Patients were excluded from the study if they met one of the following criteria: (1)  
39  
40 104 the patient had sepsis that required surgical treatment, or was caused by a surgical  
41  
42 105 procedure related infection, (2) age <18 years, (3) the patient had a positive HIV  
43  
44 106 antibody titer or had known/suspected tuberculosis at baseline, (4) expected lifespan  
45  
46 107 <3 months due to severe pre-existing comorbidities, (5) active Do Not Resuscitate or  
47  
48 108 Do Not Intubate order, and (6) pregnant.  
49

50  
51  
52 109 All patients accepted treatment according to the international guidelines for  
53  
54 110 management of sepsis and septic shock<sup>[14,15]</sup>. We collected the following  
55  
56  
57  
58  
59  
60

1  
2  
3  
4 111 demographic and clinical data: patient's gender, age, weight, height, primary site of  
5  
6 112 infection, community-acquired or hospital-acquired infection, hypotension, lactate  
7  
8 113 level, oliguria,  $\text{PaO}_2/\text{FiO}_2$ , serum creatinine, total bilirubin, platelets, international  
9  
10 114 normalized ratio (INR), Glasgow coma scale, SOFA score, acute physiology and  
11  
12 115 chronic health evaluation (APACHE) II score, septic shock, non-invasive ventilation,  
13  
14 116 intubation, positive blood culture, length of ICU stay, and length of hospital stay.  
15  
16  
17 117 Those who survived to discharge were followed for at least 90 days.

18  
19  
20 118 BMI is defined as the weight in kilograms divided by the square of the height in  
21  
22 119 meters ( $\text{kg}/\text{m}^2$ ). Using the World Health Organization (WHO) criteria for designation  
23  
24 120 of BMI <sup>[4]</sup>, patients were classified as underweight ( $\text{BMI} < 18.50 \text{ kg}/\text{m}^2$ ), normal  
25  
26 121 weight ( $\text{BMI} = 18.50$  to  $24.99 \text{ kg}/\text{m}^2$ ), overweight ( $\text{BMI} = 25.0$  to  $29.99 \text{ kg}/\text{m}^2$ ), and  
27  
28 122 obese ( $\text{BMI} \geq 30.0 \text{ kg}/\text{m}^2$ ).

### 32 123 **Outcomes**

33  
34  
35 124 The primary outcome was 90-day mortality, while the secondary outcomes were  
36  
37 125 in-hospital mortality, length of ICU stay, and length of hospital stay.

### 38 126 **Statistical analysis**

39  
40  
41 127 Continuous variables were expressed as median (interquartile range) and  
42  
43 128 categorical variables as numbers (%). Clinical data were compared among the  
44  
45 129 in-hospital survivors and non-survivors. Continuous variables were compared using  
46  
47 130 the non-parametric Mann–Whitney U test, and categorical variables were compared  
48  
49 131 using the Chi squared test. Cox proportional hazard regression analysis was  
50  
51 132 undertaken to assess the factors associated with 90-day mortality. The variables  
52  
53  
54  
55  
56  
57  
58  
59  
60

1  
2  
3  
4 133 significantly associated with 90-day non-survival in the univariate analysis were used  
5  
6 134 in the Cox proportional hazard regression analysis.

7  
8 135 Patients were divided into four groups based on BMI (underweight, normal,  
9  
10 136 overweight, and obese). Clinical data were compared between the four groups, where  
11  
12 137 continuous variables were compared using the non-parametric Kruskal-Wallis H test,  
13  
14 138 and categorical variables were compared using the Chi squared test. Kaplan-Meier  
15  
16 139 survival curves were constructed to show the survival probabilities at day-90  
17  
18 140 according to BMI classification, and compared using the log rank test.

19  
20  
21  
22  
23 141 All analyses were conducted using SPSS, version 22.0 (IBM, Armonk, NY,  
24  
25 142 USA). A p value <0.05 was considered significant.

#### 26 27 28 143 **Patient involvement**

29  
30 144 No patients were involved in developing the hypothesis, the specific aims or the  
31  
32 145 research questions, nor were they involved in the design or implementation of this  
33  
34 146 study. No patients were involved in the interpretation of study results or write up of  
35  
36 147 the manuscript. There are no plans to involve patients in the dissemination of results.

37  
38  
39  
40 148

#### 41 42 149 **Results**

43  
44  
45 150 Figure 1 shows the patient-selection process. In total, 178 medical patients with  
46  
47 151 sepsis were included in this study, with male patients accounting for 65.2% (n=116).  
48  
49 152 The median age (interquartile range) was 78 (66-84) years, and most patients were at  
50  
51 153 least 65 years old (137/178 cases, 77.0%). The most common primary site of infection  
52  
53 154 was the lung (131 cases, 73.6%), followed by abdomen (15 cases, 8.4%), urinary tract  
54  
55  
56  
57  
58  
59  
60

1  
2  
3  
4 155 (13 cases, 7.3%), gastrointestinal tract (12 cases, 6.7%) and other sites (7 cases, 3.9%).  
5  
6 156 Septic shock patients accounted for 33.1% (59 cases). Blood culture was positive in  
7  
8 157 38 patients (21.3%). The 90-day mortality was 47.2% (84/178 cases), and the  
9  
10 158 in-hospital mortality was 41.6% (74/178 cases). The length of ICU stay and the length  
11  
12 159 of hospital stay were 12 (5-22) and 15 (9-28) days, respectively.

160 Compared with in-hospital survivors, non-survivors had significantly lower BMI  
161 and  $\text{PaO}_2/\text{FiO}_2$  (both  $p < 0.05$ ), higher lactate, bilirubin, INR, SOFA score and  
162 APACHE II score (all  $p < 0.05$ ). Meanwhile, more patients died with  
163 healthcare-acquired infections, hypotension, oliguria, septic shock, and intubation (all  
164  $p < 0.05$ ) (table 1).

165 Cox proportional hazard regression analysis was conducted and the independent  
166 factors for 90-day death were identified as SOFA score (HR = 1.220,  $p < 0.001$ ),  
167 APACHE II score (HR = 1.050,  $p < 0.001$ ) and BMI (HR = 0.940,  $p = 0.029$ ) (table  
168 2).

169 Patients were divided into four groups based on BMI [underweight 33 (18.5%),  
170 normal 98 (55.1%), overweight 36 (20.2%), and obese 11 (6.2%)] . The percentage of  
171 males (72.7%, 71.4%, 55.6%, and 18.2%,  $p = 0.002$ ), chronic obstructive  
172 pulmonary disease (24.2%, 21.4%, 0, and 27.3%,  $p=0.017$ ), hypotension (57.6%,  
173 34.7%, 25.0%, and 9.1%,  $p = 0.007$ ), septic shock (57.6%, 30.6%, 25.0%, and 9.1%,  
174  $p = 0.004$ ), in-hospital mortality (60.6%, 41.8%, 30.6%, and 18.2%,  $p = 0.027$ ) and  
175 90-day mortality (66.7%, 48.0%, 36.1%, and 18.2%,  $p = 0.015$ ) were statistically  
176 different among the four groups (table 3).

1  
2  
3  
4 177 Kaplan-Meier survival curves were constructed to show the survival probabilities  
5  
6 178 at day-90 according to BMI classification and these were compared using the log rank  
7  
8 179 test, which also showed that higher BMI was associated with better prognosis  
9  
10  
11 180 (p=0.008) (figure 2).  
12

13  
14 181

## 15 182 **Discussion**

16  
17  
18 183 This prospective observational cohort study was focused on medical patients with  
19  
20 184 sepsis admitted to the ICU, and the results showed that, besides SOFA score and  
21  
22 185 APACHE II score, BMI was identified as an independent factor for 90-day mortality  
23  
24 186 by Cox regression analysis. The association of SOFA and APACHE II score with  
25  
26 187 mortality in this cohort was consistent with previous studies<sup>[16-18]</sup>. However, BMI was  
27  
28 188 also found to be an independent predictor of survival, where 90-day mortality  
29  
30 189 decreased with an increase in BMI. While studies examining the risk factors  
31  
32 190 associated with outcomes in sepsis reached inconsistent conclusions on the  
33  
34 191 association of BMI with mortality, our results confirmed that BMI was an  
35  
36 192 independent predictor of mortality in patients with sepsis caused by medical  
37  
38 193 conditions.  
39

40  
41  
42 194 Globally, the prevalence of obesity has reached epidemic proportions, especially  
43  
44 195 in developed countries<sup>[19]</sup>. BMI is still a useful proxy of overall health because it is  
45  
46 196 highly correlated with body surface area, which is commonly used as a surrogate  
47  
48 197 measure in obesity classification. Even though it is widely accepted that obesity is a  
49  
50 198 risk factor for diabetes mellitus, hypertension, and cardiovascular diseases, the present  
51  
52  
53  
54  
55  
56  
57  
58  
59  
60

1  
2  
3  
4 199 study and several other studies have indicated that overweight and obese patients with  
5  
6 200 sepsis tend to experience lower mortality. This has been called the “obesity paradox”  
7  
8 201 [5-9,20]. Although some researchers have expressed doubt that the true paradox may lie  
9  
10 202 in the variations in sepsis interventions [6,21], a meta-analysis concluded that  
11  
12 203 individuals who are considered overweight or obese have a reduced adjusted mortality  
13  
14 204 when admitted to the ICU with sepsis or septic shock [8]. Recently another  
15  
16 205 meta-analysis also concluded that being overweight was associated with lower  
17  
18 206 mortality (OR 0.87, 95% CI 0.77-0.97, p = 0.02) compared with obese (OR 0.89, 95%  
19  
20 207 CI 0.72-1.10, p = 0.29) and morbidly obese (OR 0.64, 95% CI 0.38-1.08, p = 0.09)  
21  
22 208 patients who did not exhibit significantly reduced mortality compared with normal  
23  
24 209 weight patients [12]. In a large and nationally representative sample of over 1,000  
25  
26 210 hospitals in the US, obesity was found to be significantly associated with a 16%  
27  
28 211 decrease in the odds of dying among sepsis patients who were hospitalized [22].

29  
30  
31  
32  
33  
34  
35 212 Underweight patients with sepsis may be more common in developing countries  
36  
37 213 than developed countries. In the present study, the percentages of underweight,  
38  
39 214 normal weight, overweight and obese patients were 18.4%, 55.3%, 20.1%, and 6.1%,  
40  
41 215 respectively, while those with sepsis in a study in Canada and the US represented  
42  
43 216 6.8%, 35.3%, 28.3%, and 29.0% [6]. Being underweight was found to be one of the  
44  
45 217 independent risk factors of mortality in a study on the correlation between surgical  
46  
47 218 site infection and mortality [10]. Furthermore, Lee et al [11] also reported that being  
48  
49 219 underweight was associated with mortality in patients with severe sepsis and septic  
50  
51 220 shock.  
52  
53  
54  
55  
56  
57  
58  
59  
60

1  
2  
3  
4 221        Consequently, previous studies on sepsis have shown that overweight and obese  
5  
6 222        patients have a decreased risk for mortality<sup>[5-9,20,22]</sup>, and underweight patients may  
7  
8 223        have a higher mortality<sup>[10,11]</sup>. However, BMI has not been shown to be an independent  
9  
10 224        factor for clinical outcomes by multivariable analyses. In our cohort of medical  
11  
12 225        patients with sepsis, which mainly included the elderly and less obese patients, BMI  
13  
14 226        was identified as an independent factor for survival. The mechanism of the correlation  
15  
16 227        between BMI and mortality of sepsis is unclear. There are several potential reasons  
17  
18 228        that could explain this. First, higher BMI resulted in more fat reserves, and patients  
19  
20 229        could have a greater capacity to cope with the inflammatory response during sepsis  
21  
22 230        and sepsis-associated acute lung injury<sup>[23-25]</sup>. Furthermore, they may be able to  
23  
24 231        tolerate extensive weight loss and dysfunction associated with critical illness<sup>[26]</sup>.  
25  
26 232        Secondly, a higher BMI can lead to an increased level of lipoproteins. High-density  
27  
28 233        lipoproteins may not only bind and inactivate lipopolysaccharide (LPS) or other  
29  
30 234        harmful bacterial products released during sepsis<sup>[27]</sup>, but also modulate adhesion  
31  
32 235        molecule expression, upregulate endothelial nitric oxide synthase, and counteract  
33  
34 236        oxidative stress<sup>[28]</sup>. Thirdly, higher BMI can lead to increased adipose tissue  
35  
36 237        deposition. Adipose tissue is increasingly being considered as a functional endocrine  
37  
38 238        organ and associated with increased renin-angiotensin system activity<sup>[29]</sup>. It appears  
39  
40 239        to have protective hemodynamic effects during sepsis and may decrease the need for  
41  
42 240        fluid or vasopressor support<sup>[21,30]</sup>.

43  
44 241        In general, sex has not been found to be an independent predictor for survival in  
45  
46 242        patients with sepsis, which is the same as the results of our current study. But in some



1  
2  
3  
4 243 special population, for example in liver cirrhosis patients with bloodstream infection,  
5  
6 244 male sex may be an independent risk factor for mortality<sup>[31]</sup>.  
7

8 245 As the relationship between BMI and clinical outcomes of sepsis may be related  
9  
10 246 partly to differences in patient characteristics, we therefore set out to evaluate the  
11  
12 247 impact of BMI on survival in a cohort of medical patients with sepsis, which is  
13  
14 248 different from surgical septic patients. Ranieri et al <sup>[32]</sup> reported that the primary sites  
15  
16 249 of infection in adults with septic shock were lung (43.9%), abdomen (30.0%), urinary  
17  
18 250 tract (12.3%), skin (5.5%) and other sites (8.3%). Scheer et al <sup>[33]</sup> found that the most  
19  
20 251 common primary site of infection was different between medical and surgical patients.  
21  
22 252 In medical patients, lung was the most common primary site (42.0%-56.7%), while it  
23  
24 253 was abdomen (48.4%-64.4%) in surgical patients. It should be noted that in the  
25  
26 254 majority of our patients (73.6%) sepsis was associated with pulmonary infection, a  
27  
28 255 much higher percentage as compared to other studies. He et al<sup>[34]</sup> reported that  
29  
30 256 pulmonary-sepsis showed worse outcome than abdominal-sepsis, and pulmonary  
31  
32 257 infection is a risk factor for one-year mortality and quality of life after sepsis.  
33  
34  
35  
36  
37  
38  
39

40 258 There were several limitations to our study. Firstly, the BMI of our patients  
41  
42 259 ranged from 12.11 to 32.46. There was no morbidly obese patient in the current study.  
43  
44 260 In fact, morbidly obese people are rare in this country. Secondly, the present study  
45  
46 261 used weight ascertained at ICU admission, rather than the patient's true outpatient  
47  
48 262 weight. This practice may misclassify the BMI category in as many as 21.9% of  
49  
50 263 patients due to lack of fluid balance adjustment <sup>[35]</sup>. Thirdly, BMI was used to  
51  
52 264 determine the nutritional status of patients in this study. BMI is a simple index and  
53  
54  
55  
56  
57  
58  
59  
60

1  
2  
3  
4 265 widely used in clinical practice, but other indices such as percent body fat might  
5  
6 266 better reflect body composition<sup>[36]</sup>. Lastly, it was a single-center study with 178  
7  
8 267 participants, and a large proportion of our patients were older than 65 years, which  
9  
10  
11 268 may have led to a sample-related bias.

## 12 13 269 **Conclusions**

14  
15  
16 270 To our knowledge, this is the first prospective cohort study that focused on  
17  
18 271 medical patients with sepsis, showing that BMI was an independent predictor of  
19  
20 272 survival, patients with lower BMI having a higher risk of death.  
21  
22

23 273

## 24 25 274 **Acknowledgements**

26  
27  
28 275 Not applicable.  
29

30 276

## 31 32 33 277 **Authors' contributions**

34  
35 278 QTZ, YCS, YAZ designed the study. QTZ, YCS, NS, YAZ, and QBM coordinated the  
36  
37 279 study. MW, JZ, YLD, SL, and HXG were responsible for patient screening,  
38  
39 280 enrollment, and follow-up. QTZ, MW, and YCS analyzed the data. QTZ drafted the  
40  
41 281 manuscript. YCS critically revised the manuscript. All authors had full access to all  
42  
43 282 study data, read and approved the final version of the manuscript.  
44  
45  
46

47 283

## 48 49 50 284 **Funding**

51  
52 285 None.  
53  
54

55 286  
56  
57  
58  
59  
60

1  
2  
3  
4 287 **Competing interests**

5  
6 288 None declared.

7  
8  
9 289

10  
11 290 **Ethics approval and consent to participate**

12  
13 291 The study protocol was approved (approval number M2015021) by the ethics  
14  
15 292 committee of Peking University Third Hospital, Beijing, China. All patients or their  
16  
17 293 legally authorized representatives provided written informed consent to participate in  
18  
19  
20 294 the study.

21  
22  
23 295

24  
25 296 **Data sharing statement**

26  
27  
28 297 The authors declare that all data supporting the findings of this study are available  
29  
30 298 within the article.

31  
32  
33 299

34  
35 300 **References**

- 36  
37 301 1. Singer M, Deutschman CS, Seymour CW, et al. The Third International Consensus  
38  
39 302 Definitions for Sepsis and Septic Shock (Sepsis-3). *JAMA* 2016;315:801-10.
- 40  
41 303 2. Angus DC, van der Poll T. Severe sepsis and septic shock. *N Engl J Med* 2013;369:2063.
- 42  
43 304 3. Bouza C, López-Cuadrado T, Saz-Parkinson Z, et al. Epidemiology and recent trends of  
44  
45 305 severe sepsis in Spain: a nationwide population-based analysis (2006-2011). *BMC Infect Dis*  
46  
47 306 2014; 14:3863.
- 48  
49 307 4. WHO classification of body mass index (BMI). [[http://apps.who.int/bmi/index.jsp?introPage=](http://apps.who.int/bmi/index.jsp?introPage=intro_3.html)  
50  
51  
52  
53  
54 308 [intro\\_3.html](http://apps.who.int/bmi/index.jsp?introPage=intro_3.html)] Accessed on 2 March 2015.

- 1  
2  
3  
4 309 5. Wurzinger B, Dünser MW, Wohlmuth C, et al. The association between body-mass index and  
5  
6 310 patient outcome in septic shock: a retrospective cohort study. *Wien Klin Wochenschr* 2010;122:  
7  
8 311 31-6.  
9  
10  
11 312 6. Arabi YM, Dara SI, Tamim HM, et al. Clinical characteristics, sepsis interventions and  
12  
13 313 outcomes in the obese patients with septic shock:an international multicenter cohort study.  
14  
15 314 *Crit Care* 2013;17:R72.  
16  
17  
18 315 7. Prescott HC, Chang VW, O'Brien JM Jr, et al. Obesity and 1-year outcomes in older  
19  
20 316 Americans with severe sepsis. *Crit Care Med* 2014;42:1766-74.  
21  
22  
23 317 8. Pepper DJ, Sun J, Welsh J, et al. Increased body mass index and adjusted mortality in ICU  
24  
25 318 patients with sepsis or septic shock:a systematic review and meta-analysis. *Crit Care*  
26  
27 319 2016;20:181.  
28  
29  
30 320 9. Gaulton TG, Marshall MacNabb C, Mikkelsen ME, et al. A retrospective cohort study  
31  
32 321 examining the association between body mass index and mortality in severe sepsis. *Intern*  
33  
34 322 *Emerg Med* 2015;10:471-9.  
35  
36  
37 323 10. Giles KA, Hamdan AD, Pomposelli FB, et al. Body mass index:surgical site infections and  
38  
39 324 mortality after lower extremity bypass from the National Surgical Quality Improvement  
40  
41 325 Program 2005-2007. *Ann Vasc Surg* 2010;24:48-56.  
42  
43  
44 326 11. Lee SM, Kang JW, Jo YH, et al. Underweight is associated with mortality in patients with  
45  
46 327 severe sepsis and septic shock. *Intensive Care Med Exp* 2015; 3:A876.  
47  
48  
49 328 12. Wang S, Liu X, Chen Q, et al. The role of increased body mass index in outcomes of sepsis: a  
50  
51 329 systematic review and meta-analysis. *BMC Anesthesiol* 2017;17:118.  
52  
53  
54 330 13. Ng PY, Eikermann M. The obesity conundrum in sepsis. *BMC Anesthesiol* 2017;17:147.  
55  
56  
57  
58  
59  
60

- 1  
2  
3  
4 331 14. Dellinger RP, Levy MM, Rhodes A, et al. Surviving sepsis campaign: international guidelines  
5  
6 332 for management of severe sepsis and septic shock: 2012. *Crit Care Med* 2013;41:580-637.  
7  
8 333 15. Rhodes A, Evans LE, Alhazzani W, et al. Surviving Sepsis Campaign: International  
9  
10 334 Guidelines for Management of Sepsis and Septic Shock: 2016. *Intensive Care Med* 2017;  
11  
12 335 43:304-77.  
13  
14  
15 336 16. de Carvalho MA, Freitas FG, Silva Junior HT, et al. Mortality predictors in renal transplant  
16  
17 337 recipients with severe sepsis and septic shock. *PLoS One* 2014;9:e111610.  
18  
19 338 17. Innocenti F, Tozzi C, Donnini C, et al. SOFA score in septic patients: incremental prognostic  
20  
21 339 value over age, comorbidities, and parameters of sepsis severity. *Intern Emerg*  
22  
23 340 *Med* 2018;13:405-12.  
24  
25  
26 341 18. Song JE, Kim MH, Jeong WY, et al. Mortality Risk Factors for Patients with Septic  
27  
28 342 Shock after Implementation of the Surviving Sepsis Campaign Bundles. *Infect*  
29  
30 343 *Chemother* 2016;48:199-208.  
31  
32  
33 344 19. GBD 2015 Obesity Collaborators, Afshin A, Forouzanfar MH, et al. Health Effects of  
34  
35 345 Overweight and Obesity in 195 Countries over 25 Years. *N Engl J Med* 2017;377:13-27.  
36  
37  
38 346 20. Atamna A, Elis A, Gilady E, et al. How obesity impacts outcomes of infectious diseases. *Eur*  
39  
40 347 *J Clin Microbiol Infect Dis* 2017; 36:585-91.  
41  
42  
43 348 21. Taylor SP, Karvetski CH, Templin MA, et al. Initial fluid resuscitation following adjusted  
44  
45 349 body weight dosing is associated with improved mortality in obese patients with suspected  
46  
47 350 septic shock. *J Crit Care* 2018;43:7-12.  
48  
49  
50 351 22. Nguyen AT, Tsai CL, Hwang LY, et al. Obesity and Mortality, Length of Stay and Hospital  
51  
52 352 Cost among Patients with Sepsis: A Nationwide Inpatient Retrospective Cohort Study. *PLoS*  
53  
54  
55  
56  
57  
58  
59  
60

- 1  
2  
3  
4 353 *One* 2016; 11:e0154599.
- 5  
6 354 23. Stapleton RD, Dixon AE, Parsons PE, et al. The association between BMI and plasma  
7  
8 355 cytokine levels in patients with acute lung injury. *Chest* 2010;138:568-77.
- 9  
10  
11 356 24. Stapleton RD, Suratt BT. Obesity and nutrition in acute respiratory distress syndrome. *Clin*  
12  
13 357 *Chest Med* 2014;35:655-71.
- 14  
15  
16 358 25. Zampieri FG, Jacob V, Barbeiro HV, et al. Influence of Body Mass Index on Inflammatory  
17  
18 359 Profile at Admission in Critically Ill Septic Patients. *Int J Inflamm* 2015; 2015:734857.
- 19  
20  
21 360 26. Herridge MS, Cheung AM, Tansey CM, et al. One-year outcomes in survivors of the acute  
22  
23 361 respiratory distress syndrome. *N Engl J Med* 2003;348:683-93.
- 24  
25  
26 362 27. Wu A, Hinds CJ, Thiemermann C. High-density lipoproteins in sepsis and septic shock:  
27  
28 363 metabolism, actions, and therapeutic applications. *Shock* 2004;21:210-21.
- 29  
30  
31 364 28. Murch O, Collin M, Hinds CJ, et al. Lipoproteins in inflammation and sepsis. I. Basic science.  
32  
33 365 *Intensive Care Med* 2007; 33:13-24.
- 34  
35  
36 366 29. McGown C, Birerdinc A, Younossi ZM. Adipose tissue as an endocrine organ. *Clin Liver*  
37  
38 367 *Dis* 2014;18:41-58.
- 39  
40  
41 368 30. Salgado DR, Rocco JR, Silva E, et al. Modulation of the renin-angiotensin-aldosterone  
42  
43 369 system in sepsis: a new therapeutic approach? *Expert Opin Ther Targets* 2010; 14:11-20.
- 44  
45  
46 370 31. Zhao H, Gu X, Zhao R, et al. Evaluation of prognostic scoring systems in liver cirrhosis  
47  
48 371 patients with bloodstream infection. *Medicine (Baltimore)* 2017;96(50):e8844.
- 49  
50  
51 372 32. Ranieri VM, Thompson BT, Barie PS, et al. Drotrecogin alfa (activated) in adults with septic  
52  
53 373 shock. *N Engl J Med* 2012;366:2055-64.
- 54  
55 374 33. Scheer CS, Fuchs C, Kuhn SO, et al. Quality Improvement Initiative for Severe

- 1  
2  
3  
4 375 Sepsis and Septic Shock Reduces 90-Day Mortality: A 7.5-Year Observational Study. *Crit*  
5  
6 376 *Care Med* 2017;45:241-52.  
7  
8 377 34. He XL, Liao XL, Xie ZC, et al. Pulmonary Infection Is an Independent Risk Factor for  
9  
10 378 Long-Term Mortality and Quality of Life for Sepsis Patients. *Biomed Res Int* 2016;  
11  
12 379 2016:4213712.  
13  
14  
15 380 35. O'Brien JM Jr, Philips GS, Ali NA, et al. The association between body mass index, processes  
16  
17 381 of care, and outcomes from mechanical ventilation: a prospective cohort study.  
18  
19 382 *Crit Care Med* 2012;40:1456-63.  
20  
21  
22 383 36. Waisbren E, Rosen H, Bader AM, et al. Percent body fat and prediction of surgical site  
23  
24 384 infection. *J Am Coll Surg* 2010;210:381-9.  
25  
26  
27 385  
28  
29 386  
30  
31 387  
32  
33 388  
34  
35 389  
36  
37 390  
38  
39 391  
40  
41 392  
42  
43 393  
44  
45 394  
46  
47 395  
48  
49 396  
50  
51  
52  
53  
54  
55  
56  
57  
58  
59  
60

397 **Table 1. Comparison of demographics and clinical data between groups defined by clinical**  
 398 **outcome in 178 patients with sepsis**

| Characteristics                      | Survivors<br>(n=104) | Non survivors<br>(n=74) | p value |
|--------------------------------------|----------------------|-------------------------|---------|
| Age (year)                           | 78.0 (60.0-84.0)     | 78.0 (69.0-84.0)        | 0.291   |
| Males                                | 67 (64.4)            | 49 (66.2)               | 0.805   |
| Body mass index (kg/m <sup>2</sup> ) | 23.2 (20.4-26.1)     | 21.7 (18.4-24.2)        | 0.006   |
| <b>Comorbidities</b>                 |                      |                         |         |
| COPD                                 | 23 (22.1)            | 9 (12.2)                | 0.088   |
| Diabetes mellitus                    | 26 (25.0)            | 21 (28.4)               | 0.614   |
| Hypertension                         | 47 (45.2)            | 31 (41.9)               | 0.662   |
| Cerebrovascular disease              | 30 (28.8)            | 15 (20.3)               | 0.194   |
| Neoplasm                             | 18 (17.3)            | 12 (16.2)               | 0.848   |
| Liver disease                        | 5 (4.8)              | 4 (5.4)                 | 1.000   |
| Heart failure                        | 20 (19.2)            | 14 (18.9)               | 0.958   |
| Chronic renal failure                | 18 (17.3)            | 11 (14.9)               | 0.664   |
| Smoking (pack years)                 | 0 (0-30.0)           | 0 (0-16.3)              | 0.509   |
| <b>Primary site of infection</b>     |                      |                         |         |
| Lung                                 | 77 (74.0)            | 54 (73.0)               | 0.874   |
| Abdomen                              | 10 (9.6)             | 5 (6.8)                 | 0.499   |
| Urinary tract                        | 7 (6.7)              | 6 (8.1)                 | 0.728   |
| Gastrointestinal tract               | 7 (6.7)              | 5 (6.8)                 | 1.000   |



|                                              |                     |                    |        |
|----------------------------------------------|---------------------|--------------------|--------|
| Other site                                   | 3 (2.9)             | 4 (5.4)            | 0.452  |
| <b>Community-acquired infection</b>          | 85 (81.7)           | 50 (67.6)          | 0.030  |
| <b>Hypotension</b>                           | 22 (21.2)           | 41 (55.4)          | <0.001 |
| <b>Lactate level (mmol/L)</b>                | 1.8 (1.0-3.4)       | 2.7 (1.5-5.7)      | 0.001  |
| <b>Oliguria</b>                              | 8 (7.7)             | 16 (21.6)          | 0.007  |
| <b>PaO<sub>2</sub>/FiO<sub>2</sub>(mmHg)</b> | 198.5 (119.3-287.5) | 152.5 (99.6-210.3) | 0.006  |
| <b>Serum Creatinine (μmol/L)</b>             | 97.0 (68.3-176.3)   | 108.5 (64.0-194.3) | 0.868  |
| <b>Total bilirubin (μmol/mL)</b>             | 13.1 (9.9-22.3)     | 18.0 (12.5-32.8)   | 0.015  |
| <b>Platelets (×10<sup>9</sup>/L)</b>         | 161.0 (95.8-232.5)  | 123.0 (75.0-204.3) | 0.067  |
| <b>INR</b>                                   | 1.2 (1.0-1.4)       | 1.3 (1.1-1.6)      | 0.015  |
| <b>Glasgow coma scale</b>                    | 15.0 (10.0-15.0)    | 13.0 (10.0-15.0)   | 0.117  |
| <b>SOFA score</b>                            | 5.0 (4.0-7.0)       | 9.0 (7.0-11.0)     | <0.001 |
| <b>APACHE II score</b>                       | 16.0 (12.0-22.0)    | 21.0 (17.0-30.0)   | <0.001 |
| <b>Septic shock</b>                          | 21 (20.2)           | 38 (51.4)          | <0.001 |
| <b>Non-invasive ventilation</b>              | 28 (26.9)           | 24 (32.4)          | 0.426  |
| <b>Intubated</b>                             | 36 (34.6)           | 43 (58.1)          | 0.002  |
| <b>Positive blood culture</b>                | 19 (18.3)           | 19 (25.7)          | 0.235  |
| <b>Length of ICU stay (days)</b>             | 12.0 (6.0-22.0)     | 12.0 (3.0-25.0)    | 0.521  |
| <b>Length of hospital stay (days)</b>        | 18.0 (10.0-30.0)    | 13.0 (3.0-25.0)    | 0.009  |

399 Data are presented as n (%) or median (interquartile range) unless stated otherwise. COPD: Chronic obstructive pulmonary disease; INR: International

400 normalized ratio; SOFA: Sequential organ failure assessment; APACHE: Acute physiology and chronic health evaluation.

401

402 **Table 2. Risk factors for 90-day mortality of patients with sepsis or septic shock by Cox**  
 403 **regression analysis**

| Variables                                 | Hazard ratio (95% Confidence interval) | p value |
|-------------------------------------------|----------------------------------------|---------|
| Body mass index (kg/m <sup>2</sup> )      | 0.940 (0.889-0.994)                    | 0.029   |
| Hypotension                               | 0.781 (0.229-2.670)                    | 0.694   |
| Lactate level (mmol/L)                    | 1.018 (0.943-1.098)                    | 0.648   |
| Oliguria                                  | 1.288 (0.715-2.321)                    | 0.399   |
| PaO <sub>2</sub> /FiO <sub>2</sub> (mmHg) | 1.000 (0.997-1.002)                    | 0.933   |
| Septic shock                              | 1.075 (0.320-3.615)                    | 0.907   |
| SOFA score                                | 1.229 (1.123-1.345)                    | <0.001  |
| APACHE II score                           | 1.050 (1.022-1.080)                    | <0.001  |
| Intubated                                 | 1.511 (0.931-2.452)                    | 0.095   |

404 SOFA: Sequential organ failure assessment; APACHE: Acute physiology and chronic health evaluation.

405

406

407

408

409

410

411

412

413

414 **Table 3. Comparison of demographics and clinical data among groups defined by body mass**  
 415 **index in patients with sepsis**

| <b>Characteristics</b>           | <b>Underweight</b><br>(n=33) | <b>Normal</b><br>(n=98) | <b>Overweight</b><br>(n=36) | <b>Obese</b><br>(n=11) | <b>p value</b> |
|----------------------------------|------------------------------|-------------------------|-----------------------------|------------------------|----------------|
| <b>Age (years)</b>               | 79.0 (69.0-86.0)             | 78.0 (67.0-84.0)        | 73.0 (57.0-83.0)            | 77.0 (71.0-86.0)       | 0.162          |
| <b>Males</b>                     | 24 (72.7)                    | 70 (71.4)               | 20 (55.6)                   | 2 (18.2)               | 0.002          |
| <b>Comorbidities</b>             |                              |                         |                             |                        |                |
| COPD                             | 8(24.2)                      | 21 (21.4)               | 0                           | 3 (27.3)               | 0.017          |
| Diabetes mellitus                | 8 (24.2)                     | 25 (25.5)               | 9 (25.0)                    | 5 (45.5)               | 0.530          |
| Hypertension                     | 14 (42.4)                    | 38 (38.8)               | 19 (52.8)                   | 7 (63.6)               | 0.265          |
| Cerebrovascular disease          | 10 (30.3)                    | 24 (24.5)               | 11 (30.6)                   | 0                      | 0.193          |
| Neoplasm                         | 7 (21.2)                     | 14 (14.3)               | 8 (22.2)                    | 1 (9.1)                | 0.547          |
| Liver disease                    | 2 (6.1)                      | 5 (5.1)                 | 2 (5.6)                     | 0                      | 0.879          |
| Heart failure                    | 8 (24.2)                     | 17 (17.3)               | 5 (13.9)                    | 4 (36.4)               | 0.319          |
| Chronic renal failure            | 5 (15.2)                     | 14 (14.3)               | 7 (19.4)                    | 3 (27.3)               | 0.669          |
| <b>Smoking (pack-years)</b>      | 0 (0-20.5)                   | 0 (0-30.0)              | 0 (0-3.0)                   | 0 (0-30.0)             | 0.561          |
| <b>Primary site of infection</b> |                              |                         |                             |                        |                |
| Lung                             | 27 (81.8)                    | 69 (70.4)               | 27 (75.0)                   | 8 (72.7)               | 0.637          |
| Abdomen                          | 2 (6.1)                      | 9 (9.2)                 | 3 (8.3)                     | 1 (9.1)                | 0.956          |
| Urinary tract                    | 1 (3.0)                      | 9 (9.2)                 | 2 (5.6)                     | 1 (9.1)                | 0.656          |
| Gastrointestinal tract           | 2 (6.1)                      | 6 (6.1)                 | 3 (8.3)                     | 1 (9.1)                | 0.955          |
| Other site                       | 1 (3.0)                      | 5 (5.1)                 | 1 (2.8)                     | 0                      | 0.800          |

|                                               |                    |                    |                     |                    |       |
|-----------------------------------------------|--------------------|--------------------|---------------------|--------------------|-------|
| <b>Community-acquired infection</b>           | 25 (75.8)          | 76 (77.6)          | 26 (72.2)           | 8 (72.7)           | 0.925 |
| <b>Hypotension</b>                            | 19 (57.6)          | 34 (34.7)          | 9 (25.0)            | 1 (9.1)            | 0.007 |
| <b>Lactate level (mmol/L)</b>                 | 2.4 (1.6-7.2)      | 2.1 (1.0-4.3)      | 1.6 (1.2-3.3)       | 1.9 (0.6-2.9)      | 0.201 |
| <b>Oliguria</b>                               | 8 (24.2)           | 13 (13.3)          | 3 (8.3)             | 0                  | 0.121 |
| <b>PaO<sub>2</sub>/FiO<sub>2</sub> (mmHg)</b> | 180.0(113.5-251.0) | 164.5(102.3-240.5) | 188.0(140.5-268.5)  | 215.0(153.0-300.0) | 0.340 |
| <b>Serum Creatinine (µmol/L)</b>              | 89.0 (57.0-127.0)  | 118.5 (72.5-190.5) | 91.0 (60.0-212.5)   | 86.0 (56.0-112.0)  | 0.136 |
| <b>Total bilirubin (µmol/mL)</b>              | 18.0 (10.1-33.1)   | 14.4 (10.1-28.4)   | 17.2 (12.2-26.3)    | 15.2 (11.3-20.0)   | 0.819 |
| <b>Platelets (×10<sup>9</sup>/L)</b>          | 139.0 (75.0-213.0) | 147.0 (86.0-209.8) | 182.5 (128.3-253.8) | 115.0 (49.0-144.0) | 0.056 |
| <b>INR</b>                                    | 1.3 (1.1-1.6)      | 1.2 (1.0-1.5)      | 1.2 (1.1-1.3)       | 1.1 (1.0-1.2)      | 0.269 |
| <b>Glasgow coma scale</b>                     | 13.0 (10.0-15.0)   | 15.0 (12.0-15.0)   | 15.0 (11.0-15.0)    | 13.0 (10.0-15.0)   | 0.761 |
| <b>SOFA score</b>                             | 8.0 (5.0-11.0)     | 7.0 (5.0-9.0)      | 6.0 (4.0-8.0)       | 5.0 (5.0-8.0)      | 0.382 |
| <b>APACHE II score</b>                        | 18.0 (16.0-24.0)   | 19.0 (13.0-25.0)   | 18.0 (13.0-22.0)    | 14.0 (9.0-17.0)    | 0.060 |
| <b>Septic shock</b>                           | 19 (57.6)          | 30 (30.6)          | 9 (25.0)            | 1(9.1)             | 0.004 |
| <b>Non-invasive ventilation</b>               | 7 (21.2)           | 30 (30.6)          | 10 (27.8)           | 5 (45.5)           | 0.466 |
| <b>Intubated</b>                              | 19 (57.6)          | 43 (43.9)          | 13 (36.1)           | 4 (36.4)           | 0.305 |
| <b>Positive blood culture</b>                 | 7 (21.2)           | 24 (24.5)          | 4 (11.1)            | 3 (27.3)           | 0.383 |
| <b>Length of ICU stay (days)</b>              | 10.0 (4.0-25.0)    | 13.0 (7.0-25.0)    | 11.0 (4.0-19.0)     | 9.0(6.0-13.0)      | 0.461 |
| <b>Length of hospital stay (days)</b>         | 13.0 (4.0-29.0)    | 16.0 (10.0-28.0)   | 16.0 (8.0-32.0)     | 13.0(8.0-20.0)     | 0.813 |
| <b>In-hospital mortality</b>                  | 20 (60.6)          | 41 (41.8)          | 11 (30.6)           | 2 (18.2)           | 0.027 |
| <b>90-day mortality</b>                       | 22 (66.7)          | 47 (48.0)          | 13 (36.1)           | 2 (18.2)           | 0.015 |

416 Data are presented as n (%) or median (interquartile range). COPD: Chronic obstructive pulmonary disease; INR: International normalized ratio; SOFA:

417 Sequential organ failure assessment; APACHE: Acute physiology and chronic health evaluation.

1  
2  
3  
4 418 **Fig 1. Patient selection.**

5  
6 419

7  
8 420

9  
10 421

11  
12 422

13  
14 423

15  
16 424

17  
18 425

19  
20 426

21  
22 427

23  
24 428

25  
26 429

27  
28 430

29  
30 431

31  
32 432

33  
34 433

35  
36 434

37  
38 435

39  
40 436

41  
42 437

43  
44 438

45  
46 439

1  
2  
3  
4  
5  
6  
7  
8  
9  
10  
11  
12  
13  
14  
15  
16  
17  
18  
19  
20  
21  
22  
23  
24  
25  
26  
27  
28  
29  
30  
31  
32  
33  
34  
35  
36  
37  
38  
39  
40  
41  
42  
43  
44  
45  
46  
47  
48  
49  
50  
51  
52  
53  
54  
55  
56  
57  
58  
59  
60

440 **Fig 2. Kaplan-Meier survival plot for 90-day survival of underweight, normal weight,**  
441 **overweight, and obese patients with sepsis.**

For peer review only

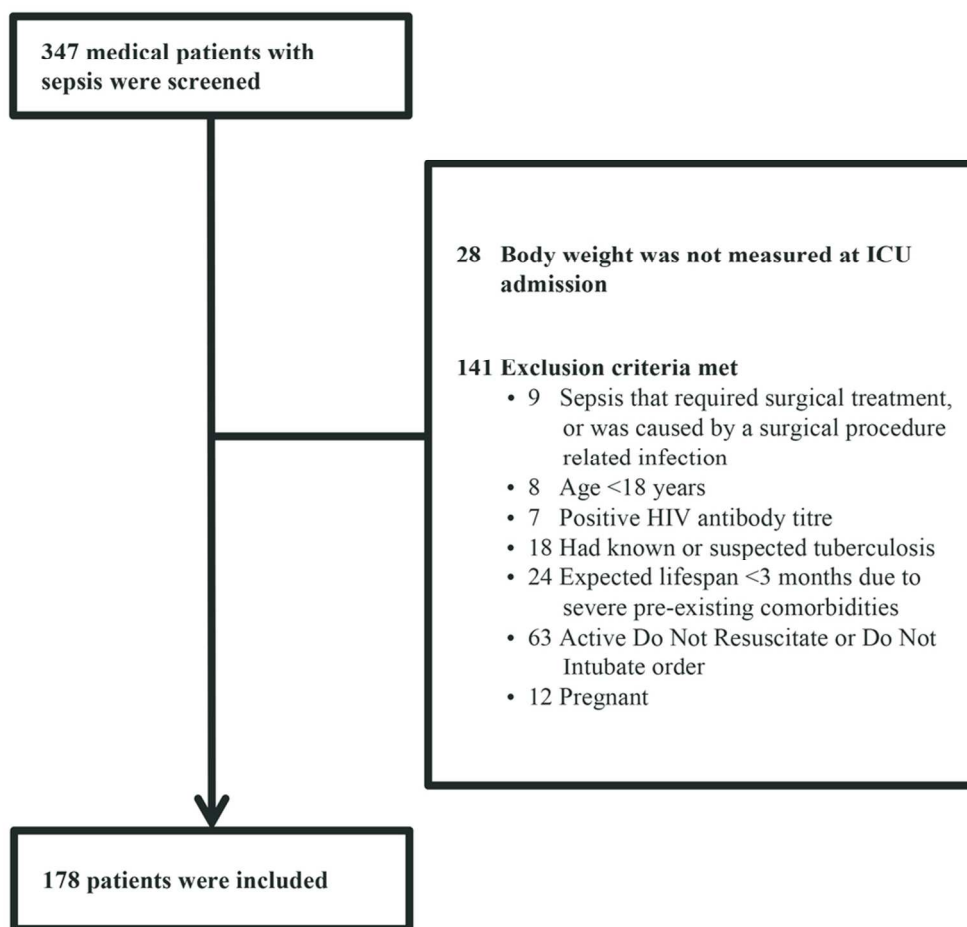

Fig 1. Patient selection.

90x90mm (300 x 300 DPI)

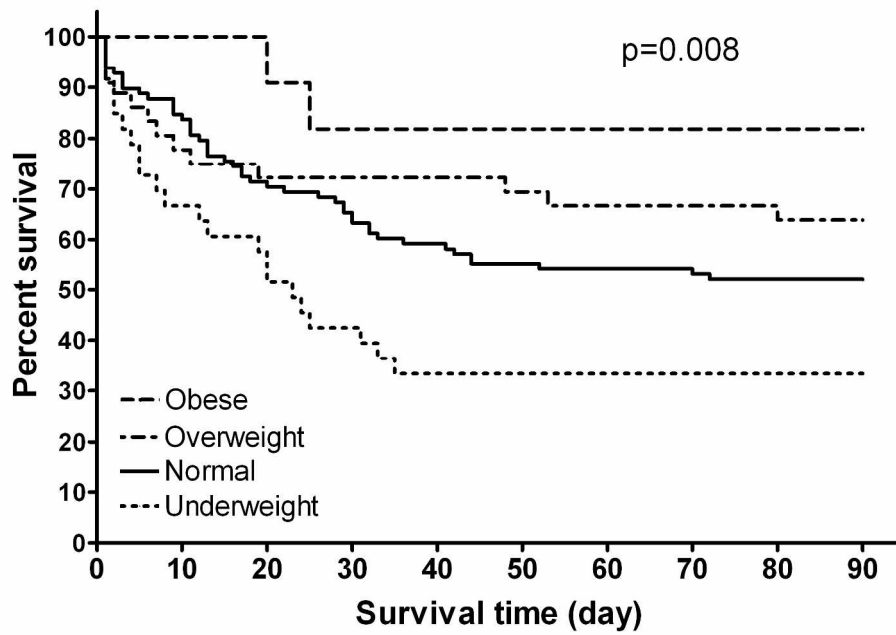

Fig 2. Kaplan-Meier survival plot for 90-day survival of underweight, normal weight, overweight, and obese patients with sepsis.

246x167mm (300 x 300 DPI)



**STROBE 2007 (v4) Statement—Checklist of items that should be included in reports of *cohort studies***

| Section/Topic                | Item # | Recommendation                                                                                                                                                                       | Reported on page # |
|------------------------------|--------|--------------------------------------------------------------------------------------------------------------------------------------------------------------------------------------|--------------------|
| Title and abstract           | 1      | (a) Indicate the study's design with a commonly used term in the title or the abstract                                                                                               | 1                  |
|                              |        | (b) Provide in the abstract an informative and balanced summary of what was done and what was found                                                                                  | 2,3                |
| <b>Introduction</b>          |        |                                                                                                                                                                                      |                    |
| Background/rationale         | 2      | Explain the scientific background and rationale for the investigation being reported                                                                                                 | 4                  |
| Objectives                   | 3      | State specific objectives, including any prespecified hypotheses                                                                                                                     | 4                  |
| <b>Methods</b>               |        |                                                                                                                                                                                      |                    |
| Study design                 | 4      | Present key elements of study design early in the paper                                                                                                                              | 5                  |
| Setting                      | 5      | Describe the setting, locations, and relevant dates, including periods of recruitment, exposure, follow-up, and data collection                                                      | 5                  |
| Participants                 | 6      | (a) Give the eligibility criteria, and the sources and methods of selection of participants. Describe methods of follow-up                                                           | 5                  |
|                              |        | (b) For matched studies, give matching criteria and number of exposed and unexposed                                                                                                  | N/A                |
| Variables                    | 7      | Clearly define all outcomes, exposures, predictors, potential confounders, and effect modifiers. Give diagnostic criteria, if applicable                                             | 5,6                |
| Data sources/<br>measurement | 8*     | For each variable of interest, give sources of data and details of methods of assessment (measurement). Describe comparability of assessment methods if there is more than one group | 6,7                |
| Bias                         | 9      | Describe any efforts to address potential sources of bias                                                                                                                            | N/A                |
| Study size                   | 10     | Explain how the study size was arrived at                                                                                                                                            | N/A                |
| Quantitative variables       | 11     | Explain how quantitative variables were handled in the analyses. If applicable, describe which groupings were chosen and why                                                         | 6,7                |
| Statistical methods          | 12     | (a) Describe all statistical methods, including those used to control for confounding                                                                                                | 6,7                |
|                              |        | (b) Describe any methods used to examine subgroups and interactions                                                                                                                  | 6,7                |
|                              |        | (c) Explain how missing data were addressed                                                                                                                                          | N/A                |
|                              |        | (d) If applicable, explain how loss to follow-up was addressed                                                                                                                       | N/A                |
|                              |        | (e) Describe any sensitivity analyses                                                                                                                                                | N/A                |
| <b>Results</b>               |        |                                                                                                                                                                                      |                    |

|                          |     |                                                                                                                                                                                                              |         |
|--------------------------|-----|--------------------------------------------------------------------------------------------------------------------------------------------------------------------------------------------------------------|---------|
| Participants             | 13* | (a) Report numbers of individuals at each stage of study—eg numbers potentially eligible, examined for eligibility, confirmed eligible, included in the study, completing follow-up, and analysed            | 7,8     |
|                          |     | (b) Give reasons for non-participation at each stage                                                                                                                                                         | N/A     |
|                          |     | (c) Consider use of a flow diagram                                                                                                                                                                           | 7       |
| Descriptive data         | 14* | (a) Give characteristics of study participants (eg demographic, clinical, social) and information on exposures and potential confounders                                                                     | 7,8     |
|                          |     | (b) Indicate number of participants with missing data for each variable of interest                                                                                                                          | N/A     |
|                          |     | (c) Summarise follow-up time (eg, average and total amount)                                                                                                                                                  | 8       |
| Outcome data             | 15* | Report numbers of outcome events or summary measures over time                                                                                                                                               | 8       |
| Main results             | 16  | (a) Give unadjusted estimates and, if applicable, confounder-adjusted estimates and their precision (eg, 95% confidence interval). Make clear which confounders were adjusted for and why they were included | 8,19-23 |
|                          |     | (b) Report category boundaries when continuous variables were categorized                                                                                                                                    | 6       |
|                          |     | (c) If relevant, consider translating estimates of relative risk into absolute risk for a meaningful time period                                                                                             | N/A     |
| Other analyses           | 17  | Report other analyses done—eg analyses of subgroups and interactions, and sensitivity analyses                                                                                                               | N/A     |
| <b>Discussion</b>        |     |                                                                                                                                                                                                              |         |
| Key results              | 18  | Summarise key results with reference to study objectives                                                                                                                                                     | 9-12    |
| <b>Limitations</b>       |     |                                                                                                                                                                                                              |         |
| Interpretation           | 20  | Give a cautious overall interpretation of results considering objectives, limitations, multiplicity of analyses, results from similar studies, and other relevant evidence                                   | 12,13   |
| Generalisability         | 21  | Discuss the generalisability (external validity) of the study results                                                                                                                                        | 13      |
| <b>Other information</b> |     |                                                                                                                                                                                                              |         |
| Funding                  | 22  | Give the source of funding and the role of the funders for the present study and, if applicable, for the original study on which the present article is based                                                | 13      |

\*Give information separately for cases and controls in case-control studies and, if applicable, for exposed and unexposed groups in cohort and cross-sectional studies.

**Note:** An Explanation and Elaboration article discusses each checklist item and gives methodological background and published examples of transparent reporting. The STROBE checklist is best used in conjunction with this article (freely available on the Web sites of PLoS Medicine at <http://www.plosmedicine.org/>, Annals of Internal Medicine at <http://www.annals.org/>, and Epidemiology at <http://www.epidem.com/>). Information on the STROBE Initiative is available at [www.strobe-statement.org](http://www.strobe-statement.org).

# BMJ Open

## The impact of body mass index on survival of medical patients with sepsis: a prospective cohort study in a university hospital in China

|                                 |                                                                                                                                                                                                                                                                                                                                                                                                                                                                                                                                                                                                                                                                                                                                                                                                                                                                                                                                       |
|---------------------------------|---------------------------------------------------------------------------------------------------------------------------------------------------------------------------------------------------------------------------------------------------------------------------------------------------------------------------------------------------------------------------------------------------------------------------------------------------------------------------------------------------------------------------------------------------------------------------------------------------------------------------------------------------------------------------------------------------------------------------------------------------------------------------------------------------------------------------------------------------------------------------------------------------------------------------------------|
| Journal:                        | <i>BMJ Open</i>                                                                                                                                                                                                                                                                                                                                                                                                                                                                                                                                                                                                                                                                                                                                                                                                                                                                                                                       |
| Manuscript ID                   | bmjopen-2018-021979.R2                                                                                                                                                                                                                                                                                                                                                                                                                                                                                                                                                                                                                                                                                                                                                                                                                                                                                                                |
| Article Type:                   | Research                                                                                                                                                                                                                                                                                                                                                                                                                                                                                                                                                                                                                                                                                                                                                                                                                                                                                                                              |
| Date Submitted by the Author:   | 23-May-2018                                                                                                                                                                                                                                                                                                                                                                                                                                                                                                                                                                                                                                                                                                                                                                                                                                                                                                                           |
| Complete List of Authors:       | Zhou, Qingtao; Peking University Third Hospital, Department of respiratory and critical care medicine<br>Wang, Meng; Peking University Third Hospital, Department of respiratory and critical care medicine<br>Li, Shuo; Peking University Third Hospital, Emergency Department<br>Zhang, Jing; Peking University Third Hospital, Department of respiratory and critical care medicine<br>Ma, Qingbian; Peking University Third Hospital, Emergency Department<br>Ding, Yanling; Peking University Third Hospital, Department of respiratory and critical care medicine<br>Ge, Hongxia; Peking University Third Hospital, Emergency Department<br>Shen, Ning; Peking University Third Hospital, Department of respiratory and critical care medicine<br>Zheng, Yaan; Peking University Third Hospital, Emergency Department<br>Sun, Yongchang; Peking University Third Hospital, Department of respiratory and critical care medicine |
| <b>Primary Subject Heading</b>: | Intensive care                                                                                                                                                                                                                                                                                                                                                                                                                                                                                                                                                                                                                                                                                                                                                                                                                                                                                                                        |
| Secondary Subject Heading:      | Infectious diseases                                                                                                                                                                                                                                                                                                                                                                                                                                                                                                                                                                                                                                                                                                                                                                                                                                                                                                                   |
| Keywords:                       | Adult intensive & critical care < INTENSIVE & CRITICAL CARE, INFECTIOUS DISEASES, THORACIC MEDICINE                                                                                                                                                                                                                                                                                                                                                                                                                                                                                                                                                                                                                                                                                                                                                                                                                                   |
|                                 |                                                                                                                                                                                                                                                                                                                                                                                                                                                                                                                                                                                                                                                                                                                                                                                                                                                                                                                                       |

SCHOLARONE™  
Manuscripts

1  
2  
3  
4 **1 The impact of body mass index on survival of medical patients with sepsis: a**  
5  
6 **2 prospective cohort study in a university hospital in China**  
7

8  
9  
3

10  
11 4 Qingtao Zhou<sup>1</sup>, Meng Wang<sup>1</sup>, Shuo Li<sup>2</sup>, Jing Zhang<sup>1</sup>, Qingbian Ma<sup>2</sup>, Yanling Ding<sup>1</sup>,  
12  
13 5 Hongxia Ge<sup>2</sup>, Ning Shen<sup>1</sup>, Yaan Zheng<sup>2</sup>, Yongchang Sun<sup>1\*</sup>  
14

15  
16  
6

17  
18 7 <sup>1</sup> Department of Respiratory and Critical Care Medicine, Peking University Third  
19  
20 8 Hospital, Beijing, China.  
21

22  
23 9 <sup>2</sup> Emergency Department, Peking University Third Hospital, Beijing, China.  
24

25  
26  
10

27  
28 11 **\*Corresponding author:** Yongchang Sun, Department of Respiratory and Critical  
29  
30 12 Care Medicine, Peking University Third Hospital, 49 North Garden Road, Haidian  
31  
32 13 District, Beijing 100191, China. Email: suny@bjmu.edu.cn  
33

34  
35  
14

36  
37  
15

38  
39  
16

40  
41  
17

42  
43  
18

44  
45  
19

46  
47  
20

48  
49  
21

50  
51  
22

1  
2  
3  
4  
5  
6  
7  
8  
9  
10  
11  
12  
13  
14  
15  
16  
17  
18  
19  
20  
21  
22  
23 **Abstract**

24 **Objective** To evaluate the impact of body mass index (BMI) on survival of a Chinese  
25 cohort of medical patients with sepsis.

26 **Design** A single-center prospective cohort study conducted from May 2015 to April  
27 2017.

28 **Setting** A tertiary care university hospital in China.

29 **Participants** 178 patients with sepsis admitted to the medical intensive care unit (ICU)  
30 were included.

31 **Main outcome measures** The primary outcome was 90-day mortality. The secondary  
32 outcomes were in-hospital mortality, length of ICU stay, and length of hospital stay.

33 **Results** The median age (interquartile range) was 78 (66-84) years and the majority of  
34 patients (77.0%) were older than 65 years. The 90-day mortality was 47.2%. The  
35 in-hospital mortality was 41.6%, and the length of ICU stay and hospital stay were 12  
36 (5-22) and 15 (9-28) days, respectively. Cox proportional hazard regression analysis  
37 identified that sequential organ failure assessment (SOFA) score (HR = 1.229,  $p <$   
38 0.001), APACHE II score (HR = 1.050,  $p <$  0.001) and BMI (HR = 0.940,  $p =$  0.029)  
39 were all independently associated with the 90-day mortality. Patients were divided  
40 into four groups based on BMI [underweight 33 (18.5%), normal 98 (55.1%),  
41 overweight 36 (20.2%), and obese 11 (6.2%)]. The 90-day mortality (66.7%, 48.0%,  
42 36.1%, and 18.2%,  $p =$  0.015) and in-hospital mortality (60.6%, 41.8%, 30.6%, and  
43 18.2%,  $p =$  0.027) were statistically different among the four groups. Differences in  
44 survival among the four groups were demonstrated by Kaplan-Meier survival analysis

1  
2  
3  
4 45 (p = 0.008), with the underweight patients showing a lower survival rate.  
5

6 46 **Conclusions** BMI was an independent factor associated with survival in a Chinese  
7  
8 47 cohort of medical patients with sepsis, patients with lower BMI having a higher risk  
9  
10  
11 48 of death.  
12

13  
14  
15  
16 50 **Key words:** Sepsis; Septic shock; Body mass index; Critical care; Mortality  
17

18  
19  
20  
21 52 **Strengths and limitations of this study**  
22

23 53 Our prospective observational cohort study was focused on medical patients with  
24  
25 54 sepsis and conducted at a university hospital in China.  
26

27  
28 55 The impact of BMI on 90-day survival of medical patients with sepsis was evaluated  
29  
30 56 by Cox proportional hazard regression analysis and Kaplan-Meier survival analysis.  
31

32  
33 57 Our analyses were limited by the use of weight ascertained at ICU admission, rather  
34  
35 58 than the patient's true outpatient weight.  
36

37  
38  
39  
40  
41  
42  
43  
44  
45  
46  
47  
48  
49  
50  
51  
52  
53  
54  
55  
56  
57  
58  
59  
60

60

61

62

63

64

65

66

## 67 **Introduction**

68 Sepsis is a major cause of morbidity and mortality worldwide <sup>[1]</sup>. Of these  
69 patients, half are treated in the intensive care unit (ICU) <sup>[2]</sup>. In a national  
70 population-based study of sepsis in Spain, medical diagnostic categories were the  
71 majority of causes in patients who developed sepsis, while surgical diagnoses were  
72 identified in only 26% of cases <sup>[3]</sup>.

73 Body mass index (BMI) is a simple index of weight-for-height that is commonly  
74 used to classify whether adults are underweight, overweight and obese <sup>[4]</sup>. Several  
75 studies have examined the effects of BMI on mortality with conflicting conclusions.  
76 Lower mortality in the obese has been observed in some studies <sup>[5-9]</sup>, but some  
77 researchers believe that the true paradox may lie in the variations in sepsis  
78 interventions, such as the administration of resuscitation fluids and antimicrobial  
79 therapy <sup>[6]</sup>. In other studies, morbidly obese and underweight patients have been  
80 shown to be associated with higher mortality <sup>[10,11]</sup>. Thus, the impact of BMI on  
81 survival of patients with sepsis is still controversial <sup>[12, 13]</sup>.

82 As the relationship between BMI and clinical outcomes of sepsis is complex, we  
83 therefore set out to evaluate prospectively the impact of BMI on survival in a cohort  
84 of medical patients with sepsis admitted to the medical ICU in a university hospital.

## 86 **Patients and Methods**

### 87 **Design**

88 This was a prospective cohort study, which was conducted in the medical ICU of

89 a university-affiliated urban teaching hospital in China from May 2015 to April 2017.

## 90 **Subjects**

91 Sepsis was defined as the presence (probable or documented) of infection  
92 together with systemic manifestations of infection<sup>[14]</sup>. Hospitalized patients admitted  
93 to the medical ICU with sepsis acquired in the community or in a hospital were  
94 eligible for the study if they met any of the following criteria of severe sepsis<sup>[14]</sup>: (1)  
95 sepsis-induced hypotension, (2) lactate above upper laboratory level limits  
96 (1.5mmol/L in this study), (3) urine output  $<0.5 \text{ mL Kg}^{-1} \text{ h}^{-1}$  for more than 2 h despite  
97 adequate fluid resuscitation, (4) acute lung injury with  $\text{Pao}_2/\text{Fio}_2 < 250$  in the absence  
98 of pneumonia as infection source, (5) acute lung injury with  $\text{Pao}_2/\text{Fio}_2 < 200$  in the  
99 presence of pneumonia as infection source, (6) creatinine  $>2.0 \text{ mg/dL}$  ( $176.8 \text{ } \mu\text{mol/L}$ ),  
100 (7) bilirubin  $>2 \text{ mg/dL}$  ( $34.2 \text{ } \mu\text{mol/L}$ ), (8) platelet count  $<100,000 \text{ } \mu\text{L}$ , and (9)  
101 coagulopathy (international normalized ratio  $>1.5$ ).

102 Patients were excluded from the study if they met one of the following criteria: (1)  
103 the patient had sepsis that required surgical treatment, or was caused by a surgical  
104 procedure related infection, (2) age  $<18$  years, (3) the patient had a positive HIV  
105 antibody titer or had known/suspected tuberculosis at baseline, (4) expected lifespan  
106  $<3$  months due to severe pre-existing comorbidities, (5) active Do Not Resuscitate or  
107 Do Not Intubate order, and (6) pregnant.

108 All patients accepted treatment according to the international guidelines for  
109 management of sepsis and septic shock<sup>[14,15]</sup>. We collected the following  
110 demographic and clinical data: patient's gender, age, weight, height, primary site of



1  
2  
3  
4 111 infection, community-acquired or hospital-acquired infection, blood pressure, lactate  
5  
6 112 level, urine output, PaO<sub>2</sub>/FiO<sub>2</sub>, serum creatinine, total bilirubin, platelets, international  
7  
8 113 normalized ratio (INR), Glasgow coma scale, SOFA score, acute physiology and  
9  
10 114 chronic health evaluation (APACHE) II score, non-invasive ventilation, intubation,  
11  
12 115 positive blood culture, length of ICU stay, and length of hospital stay. Those who  
13  
14 116 survived to discharge were followed for at least 90 days.

17  
18 117 BMI is defined as the weight in kilograms divided by the square of the height in  
19  
20 118 meters (kg/m<sup>2</sup>). Using the World Health Organization (WHO) criteria for designation  
21  
22 119 of BMI <sup>[4]</sup>, patients were classified as underweight (BMI < 18.50 kg/m<sup>2</sup>), normal  
23  
24 120 weight (BMI = 18.50 to 24.99 kg/m<sup>2</sup>), overweight (BMI = 25.0 to 29.99 kg/m<sup>2</sup>), and  
25  
26 121 obese (BMI ≥ 30.0 kg/m<sup>2</sup>).

## 30 122 **Outcomes**

31  
32  
33 123 The primary outcome was 90-day mortality, while the secondary outcomes were  
34  
35 124 in-hospital mortality, length of ICU stay, and length of hospital stay.

## 37 125 **Statistical analysis**

38  
39  
40 126 Continuous variables were expressed as median (interquartile range) and  
41  
42 127 categorical variables as numbers (%). Clinical data were compared between the  
43  
44 128 in-hospital survivors and non-survivors. Continuous variables were compared using  
45  
46 129 the non-parametric Mann–Whitney U test, and categorical variables were compared  
47  
48 130 using the Chi squared test. Cox proportional hazard regression analysis was  
49  
50 131 undertaken to assess the factors associated with 90-day mortality. The variables  
51  
52 132 significantly associated with 90-day non-survival in the univariate analysis were used  
53  
54  
55  
56  
57  
58  
59  
60

1  
2  
3  
4 133 in the Cox proportional hazard regression analysis.

5  
6 134 Patients were divided into four groups based on BMI (underweight, normal,  
7  
8 135 overweight, and obese). Clinical data were compared among the four groups, where  
9  
10 136 continuous variables were compared using the non-parametric Kruskal-Wallis H test,  
11  
12 137 and categorical variables were compared using the Chi squared test. Kaplan-Meier  
13  
14 138 survival curves were constructed to show the survival probabilities at day-90  
15  
16 139 according to BMI classification, and compared using the log rank test.

17  
18  
19  
20 140 All analyses were conducted using SPSS, version 22.0 (IBM, Armonk, NY,  
21  
22 141 USA). A p value <0.05 was considered significant.

#### 23 24 25 142 **Patient involvement**

26  
27  
28 143 No patients were involved in developing the hypothesis, the specific aims or the  
29  
30 144 research questions, nor were they involved in the design or implementation of this  
31  
32 145 study. No patients were involved in the interpretation of study results or write-up of  
33  
34 146 the manuscript. There are no plans to involve patients in the dissemination of results.

#### 35 36 37 38 39 40 148 **Results**

41  
42  
43 149 Figure 1 shows the patient-selection process. In total, 178 medical patients with  
44  
45 150 sepsis were included in this study, with male patients accounting for 65.2% (n=116).  
46  
47 151 The median age (interquartile range) was 78 (66-84) years, and most patients were at  
48  
49 152 least 65 years old (137/178 cases, 77.0%). The most common primary site of infection  
50  
51 153 was the lung (131 cases, 73.6%), followed by abdomen (15 cases, 8.4%), urinary tract  
52  
53 154 (13 cases, 7.3%), gastrointestinal tract (12 cases, 6.7%) and other sites (7 cases, 3.9%).  
54  
55  
56  
57  
58  
59  
60

1  
2  
3  
4 155 Septic shock patients accounted for 33.1% (59 cases). Blood culture was positive in  
5  
6 156 38 patients (21.3%). The 90-day mortality was 47.2% (84/178 cases), and the  
7  
8 157 in-hospital mortality was 41.6% (74/178 cases). The length of ICU stay and the length  
9  
10  
11 158 of hospital stay were 12 (5-22) and 15 (9-28) days, respectively.

12  
13 159 Compared with in-hospital survivors, non-survivors had significantly lower BMI  
14  
15 160 and PaO<sub>2</sub>/FiO<sub>2</sub> (both  $p < 0.05$ ), higher lactate, bilirubin, INR, SOFA score and  
16  
17 161 APACHE II score (all  $p < 0.05$ ). Meanwhile, more patients died with  
18  
19 162 healthcare-acquired infections, hypotension, oliguria, septic shock, and intubation (all  
20  
21 163  $p < 0.05$ ) (table 1).

22  
23 164 Cox proportional hazard regression analysis was conducted and the independent  
24  
25 165 factors for 90-day death were identified as SOFA score (HR = 1.220,  $p < 0.001$ ),  
26  
27 166 APACHE II score (HR = 1.050,  $p < 0.001$ ) and BMI (HR = 0.940,  $p = 0.029$ ) (table  
28  
29 167 2).

30  
31 168 Patients were divided into four groups based on BMI [underweight 33 (18.5%),  
32  
33 169 normal 98 (55.1%), overweight 36 (20.2%), and obese 11 (6.2%)] . The percentage of  
34  
35 170 males (72.7%, 71.4%, 55.6%, and 18.2%,  $p = 0.002$ ), chronic obstructive  
36  
37 171 pulmonary disease (24.2%, 21.4%, 0, and 27.3%,  $p=0.017$ ), hypotension (57.6%,  
38  
39 172 34.7%, 25.0%, and 9.1%,  $p = 0.007$ ), septic shock (57.6%, 30.6%, 25.0%, and 9.1%,  
40  
41 173  $p = 0.004$ ), in-hospital mortality (60.6%, 41.8%, 30.6%, and 18.2%,  $p = 0.027$ ) and  
42  
43 174 90-day mortality (66.7%, 48.0%, 36.1%, and 18.2%,  $p = 0.015$ ) were statistically  
44  
45 175 different among the four groups (table 3).

46  
47 176 Kaplan-Meier survival curves were constructed to show the survival probabilities  
48  
49  
50  
51  
52  
53  
54

1  
2  
3  
4 177 at day-90 according to BMI classification and these were compared using the log rank  
5  
6 178 test, which also showed that higher BMI was associated with better prognosis  
7  
8 179 (p=0.008) (figure 2).  
9

10  
11 180

## 12 13 181 **Discussion**

14  
15  
16 182 This prospective observational cohort study was focused on medical patients with  
17  
18 183 sepsis admitted to the ICU, and the results showed that besides SOFA score and  
19  
20 184 APACHE II score, BMI was identified as an independent factor for 90-day mortality  
21  
22  
23 185 by Cox regression analysis. The association of SOFA and APACHE II score with  
24  
25 186 mortality in this cohort was consistent with previous studies<sup>[16-18]</sup>. However, BMI was  
26  
27  
28 187 also found to be independently associated with survival, where 90-day mortality  
29  
30 188 decreased with an increase in BMI. While studies examining the risk factors  
31  
32  
33 189 associated with outcomes in sepsis reached inconsistent conclusions on the  
34  
35 190 association of BMI with mortality, our results confirmed that BMI was independently  
36  
37  
38 191 associated with mortality in patients with sepsis caused by medical conditions.  
39

40 192 Globally, the prevalence of obesity has reached epidemic proportions, especially  
41  
42 193 in developed countries<sup>[19]</sup>. BMI is still a useful proxy of overall health because it is  
43  
44  
45 194 highly correlated with body surface area, which is commonly used as a surrogate  
46  
47  
48 195 measure in obesity classification. Even though it is widely accepted that obesity is a  
49  
50 196 risk factor for diabetes mellitus, hypertension, and cardiovascular diseases, the present  
51  
52 197 study and several other studies have indicated that overweight and obese patients with  
53  
54  
55 198 sepsis tend to experience lower mortality. This has been called the “obesity paradox”  
56  
57

1  
2  
3  
4 199 [5-9,20]. Although some researchers have expressed doubt that the true paradox may lie  
5  
6 200 in the variations in sepsis interventions [6,21], a meta-analysis concluded that  
7  
8 201 individuals who were overweight or obese had a reduced adjusted mortality when  
9  
10 202 admitted to the ICU with sepsis or septic shock [8]. Recently another meta-analysis  
11  
12 203 also concluded that being overweight was associated with lower mortality (OR 0.87,  
13  
14 204 95% CI 0.77-0.97,  $p = 0.02$ ) compared with obese (OR 0.89, 95% CI 0.72-1.10,  $p =$   
15  
16 205 0.29) and morbidly obese (OR 0.64, 95% CI 0.38-1.08,  $p = 0.09$ ) patients who did not  
17  
18 206 exhibit significantly reduced mortality compared with normal weight patients [12]. In a  
19  
20 207 large and nationally representative sample of over 1,000 hospitals in the US, obesity  
21  
22 208 was found to be significantly associated with a 16% decrease in the odds of dying  
23  
24 209 among sepsis patients who were hospitalized [22].

25  
26  
27  
28  
29  
30 210 Underweight patients with sepsis may be more common in developing countries  
31  
32 211 than in developed countries. In the present study, the percentages of underweight,  
33  
34 212 normal weight, overweight and obese patients were 18.4%, 55.3%, 20.1%, and 6.1%,  
35  
36 213 respectively, while those with sepsis in a study in Canada and the US represented  
37  
38 214 6.8%, 35.3%, 28.3%, and 29.0% [6]. Being underweight was found to be one of the  
39  
40 215 independent risk factors of mortality in a study on the correlation between surgical  
41  
42 216 site infection and mortality [10]. Furthermore, Lee et al [11] also reported that being  
43  
44 217 underweight was associated with mortality in patients with severe sepsis and septic  
45  
46 218 shock. However, BMI has not been shown to be an independent factor for clinical  
47  
48 219 outcomes by multivariable analyses. In our cohort of medical patients with sepsis,  
49  
50 220 which mainly included elderly and less obese patients, BMI was identified as an

1  
2  
3  
4 221 independent factor for survival, patients with lower BMI having a higher risk of death.  
5  
6 222 Thus, our findings would be helpful for evaluating the clinical outcomes of medical  
7  
8 223 patients with sepsis, although validation in further large sample, multi-center studies  
9  
10  
11 224 is still needed.

12  
13 225 The mechanism of the correlation between BMI and mortality of sepsis is unclear.  
14  
15 226 There are several potential reasons that could explain this. First, higher BMI resulted  
16  
17  
18 227 in more fat reserves, and patients could have a greater capacity to cope with the  
19  
20 228 inflammatory response during sepsis and sepsis-associated acute lung injury [23-25].  
21  
22  
23 229 Furthermore, they may be able to tolerate extensive weight loss and dysfunction  
24  
25 230 associated with critical illness [26]. Secondly, a higher BMI can lead to an increased  
26  
27  
28 231 level of lipoproteins. High-density lipoproteins may not only bind and inactivate  
29  
30 232 lipopolysaccharide (LPS) or other harmful bacterial products released during sepsis  
31  
32  
33 233 [27], but also modulate adhesion molecule expression, upregulate endothelial nitric  
34  
35 234 oxide synthase, and counteract oxidative stress [28]. Thirdly, higher BMI can lead to  
36  
37  
38 235 increased adipose tissue deposition. Adipose tissue is increasingly being considered as  
39  
40 236 a functional endocrine organ and associated with increased renin-angiotensin system  
41  
42 237 activity [29]. It appears to have protective hemodynamic effects during sepsis and may  
43  
44  
45 238 decrease the need for fluid or vasopressor support [21,30].

46  
47 239 In general, sex has not been found to be an independent predictor for survival in  
48  
49  
50 240 patients with sepsis, which is the same as the results of our current study. But in some  
51  
52 241 special populations, for example in liver cirrhosis patients with bloodstream infection,  
53  
54  
55 242 male sex may be an independent risk factor for mortality [31].  
56  
57  
58  
59  
60

1  
2  
3  
4 243 As the relationship between BMI and clinical outcomes of sepsis may be related  
5  
6 244 partly to differences in patient characteristics, we therefore set out to evaluate the  
7  
8 245 impact of BMI on survival in a cohort of medical patients with sepsis, which is  
9  
10 246 different from surgical septic patients. Ranieri et al <sup>[32]</sup> reported that the primary sites  
11  
12 247 of infection in adults with septic shock were lung (43.9%), abdomen (30.0%), urinary  
13  
14 248 tract (12.3%), skin (5.5%) and other sites (8.3%). Scheer et al <sup>[33]</sup> found that the most  
15  
16 249 common primary site of infection was different between medical and surgical patients.  
17  
18 250 In medical patients, lung was the most common primary site (42.0%-56.7%), while it  
19  
20 251 was abdomen (48.4%-64.4%) in surgical patients. It should be noted that in the  
21  
22 252 majority of our patients (73.6%) sepsis was associated with pulmonary infection, a  
23  
24 253 much higher percentage as compared to other studies. He et al <sup>[34]</sup> reported that  
25  
26 254 pulmonary-sepsis showed worse outcome than abdominal-sepsis, and pulmonary  
27  
28 255 infection was a risk factor for one-year mortality and quality of life after sepsis.

29  
30  
31  
32  
33  
34  
35 256 There were several limitations to our study. Firstly, the BMI of our patients  
36  
37 257 ranged from 12.11 to 32.46. There was no morbidly obese patient in the current study.  
38  
39 258 In fact, morbidly obese people are rare in this country. Ten severe thinness patients  
40  
41 259 with BMI less than 16.0 were included in the present study, which maybe a small  
42  
43 260 danger that low BMIs represent a sample related bias. But the 90-day mortality and  
44  
45 261 in-hospital mortality of severe thinness patients were 70.0% and 60.0%, respectively,  
46  
47 262 which were not different from those of all 33 underweight patients (66.7% and 60.6%,  
48  
49 263 respectively). Secondly, the present study used weight ascertained at ICU admission,  
50  
51 264 rather than the patient's true outpatient weight. This practice may misclassify the BMI  
52  
53  
54  
55  
56  
57  
58  
59  
60

1  
2  
3  
4 265 category in as many as 21.9% of patients due to lack of fluid balance adjustment <sup>[35]</sup>.

5  
6 266 Thirdly, BMI was used to determine the nutritional status of patients in this study.

7  
8 267 BMI is a simple index and widely used in clinical practice, but other indices such as

9  
10 268 percent body fat might better reflect body composition<sup>[36]</sup>. Lastly, it was a

11  
12 269 single-center study with 178 participants, and a large proportion of our patients were

13  
14 270 older than 65 years, which may have led to a sample-related bias.

## 15 16 17 18 271 **Conclusions**

19  
20 272 To our knowledge, this is the first prospective cohort study that focused on

21  
22 273 medical patients with sepsis, showing that BMI was independently associated with

23  
24 274 survival, patients with lower BMI having a higher risk of death.

25  
26  
27  
28 275

## 29 30 276 **Acknowledgements**

31  
32 277 Not applicable.

33  
34  
35 278

## 36 37 279 **Authors' contributions**

38  
39 280 QTZ, YCS, YAZ designed the study. QTZ, YCS, NS, YAZ, and QBM coordinated the

40  
41 281 study. MW, JZ, YLD, SL, and HXG were responsible for patient screening,

42  
43 282 enrollment, and follow-up. QTZ, MW, and YCS analyzed the data. QTZ drafted the

44  
45 283 manuscript. YCS critically revised the manuscript. All authors had full access to all

46  
47 284 study data, read and approved the final version of the manuscript.

48  
49  
50  
51 285

## 52 53 286 **Funding**



1  
2  
3 287 None.  
4  
5

6 288  
7

8 **289 Competing interests**  
9

10 290 None declared.  
11  
12

13 291  
14

15 **292 Ethics approval and consent to participate**  
16

17  
18 293 The study protocol was approved (approval number M2015021) by the ethics  
19  
20 294 committee of Peking University Third Hospital, Beijing, China. All patients or their  
21  
22 295 legally authorized representatives provided written informed consent to participate in  
23  
24 296 the study.  
25  
26  
27

28 297  
29

30 **298 Data sharing statement**  
31

32  
33 299 The authors declare that all data supporting the findings of this study are available  
34  
35 300 within the article.  
36  
37

38 301  
39

40 **302 References**  
41

- 42 303 1. Singer M, Deutschman CS, Seymour CW, et al. The Third International Consensus  
43  
44 304 Definitions for Sepsis and Septic Shock (Sepsis-3). *JAMA* 2016;315:801-10.  
45  
46  
47 305 2. Angus DC, van der Poll T. Severe sepsis and septic shock. *N Engl J Med* 2013;369:2063.  
48  
49  
50 306 3. Bouza C, López-Cuadrado T, Saz-Parkinson Z, et al. Epidemiology and recent trends of  
51  
52 307 severe sepsis in Spain: a nationwide population-based analysis (2006-2011). *BMC Infect Dis*  
53  
54 308 2014; 14:3863.  
55  
56  
57  
58  
59  
60

- 1  
2  
3  
4 309 4. WHO classification of body mass index (BMI). [[http://apps.who.int/bmi/index.jsp?introPage=](http://apps.who.int/bmi/index.jsp?introPage=intro_3.html)  
5  
6 310 [intro\\_3.html](http://apps.who.int/bmi/index.jsp?introPage=intro_3.html)] Accessed on 2 March 2015.  
7  
8 311 5. Wurzinger B, Dünser MW, Wohlmuth C, et al. The association between body-mass index and  
9  
10 312 patient outcome in septic shock: a retrospective cohort study. *Wien Klin Wochenschr* 2010;122:  
11  
12 313 31-6.  
13  
14  
15 314 6. Arabi YM, Dara SI, Tamim HM, et al. Clinical characteristics, sepsis interventions and  
16  
17 315 outcomes in the obese patients with septic shock:an international multicenter cohort study.  
18  
19 316 *Crit Care* 2013;17:R72.  
20  
21  
22 317 7. Prescott HC, Chang VW, O'Brien JM Jr, et al. Obesity and 1-year outcomes in older  
23  
24 318 Americans with severe sepsis. *Crit Care Med* 2014;42:1766-74.  
25  
26  
27 319 8. Pepper DJ, Sun J, Welsh J, et al. Increased body mass index and adjusted mortality in ICU  
28  
29 320 patients with sepsis or septic shock:a systematic review and meta-analysis. *Crit Care*  
30  
31 321 2016;20:181.  
32  
33  
34 322 9. Gaulton TG, Marshall MacNabb C, Mikkelsen ME, et al. A retrospective cohort study  
35  
36 323 examining the association between body mass index and mortality in severe sepsis. *Intern*  
37  
38 324 *Emerg Med* 2015;10:471-9.  
39  
40  
41 325 10. Giles KA, Hamdan AD, Pomposelli FB, et al. Body mass index:surgical site infections and  
42  
43 326 mortality after lower extremity bypass from the National Surgical Quality Improvement  
44  
45 327 Program 2005-2007. *Ann Vasc Surg* 2010;24:48-56.  
46  
47  
48 328 11. Lee SM, Kang JW, Jo YH, et al. Underweight is associated with mortality in patients with  
49  
50 329 severe sepsis and septic shock. *Intensive Care Med Exp* 2015; 3:A876.  
51  
52  
53 330 12. Wang S, Liu X, Chen Q, et al. The role of increased body mass index in outcomes of sepsis: a  
54  
55  
56  
57  
58  
59  
60

- 1  
2  
3  
4 331 systematic review and meta-analysis. *BMC Anesthesiol* 2017;17:118.  
5  
6 332 13. Ng PY, Eikermann M. The obesity conundrum in sepsis. *BMC Anesthesiol* 2017;17:147.  
7  
8 333 14. Dellinger RP, Levy MM, Rhodes A, et al. Surviving sepsis campaign: international guidelines  
9  
10 334 for management of severe sepsis and septic shock: 2012. *Crit Care Med* 2013;41:580-637.  
11  
12  
13 335 15. Rhodes A, Evans LE, Alhazzani W, et al. Surviving Sepsis Campaign: International  
14  
15 336 Guidelines for Management of Sepsis and Septic Shock: 2016. *Intensive Care Med* 2017;  
16  
17 337 43:304-77.  
18  
19  
20 338 16. de Carvalho MA, Freitas FG, Silva Junior HT, et al. Mortality predictors in renal transplant  
21  
22 339 recipients with severe sepsis and septic shock. *PLoS One* 2014;9:e111610.  
23  
24  
25 340 17. Innocenti F, Tozzi C, Donnini C, et al. SOFA score in septic patients: incremental prognostic  
26  
27 341 value over age, comorbidities, and parameters of sepsis severity. *Intern Emerg*  
28  
29 342 *Med* 2018;13:405-12.  
30  
31  
32 343 18. Song JE, Kim MH, Jeong WY, et al. Mortality Risk Factors for Patients with Septic  
33  
34 344 Shock after Implementation of the Surviving Sepsis Campaign Bundles. *Infect*  
35  
36 345 *Chemother* 2016;48:199-208.  
37  
38  
39 346 19. GBD 2015 Obesity Collaborators, Afshin A, Forouzanfar MH, et al. Health Effects of  
40  
41 347 Overweight and Obesity in 195 Countries over 25 Years. *N Engl J Med* 2017;377:13-27.  
42  
43  
44 348 20. Atamna A, Elis A, Gilady E, et al. How obesity impacts outcomes of infectious diseases. *Eur*  
45  
46 349 *J Clin Microbiol Infect Dis* 2017; 36:585-91.  
47  
48  
49 350 21. Taylor SP, Karvetski CH, Templin MA, et al. Initial fluid resuscitation following adjusted  
50  
51 351 body weight dosing is associated with improved mortality in obese patients with suspected  
52  
53 352 septic shock. *J Crit Care* 2018;43:7-12.  
54  
55  
56  
57  
58  
59  
60

- 1  
2  
3  
4 353 22. Nguyen AT, Tsai CL, Hwang LY, et al. Obesity and Mortality, Length of Stay and Hospital  
5  
6 354 Cost among Patients with Sepsis: A Nationwide Inpatient Retrospective Cohort Study. *PLoS*  
7  
8 355 *One* 2016; 11:e0154599.
- 10 356 23. Stapleton RD, Dixon AE, Parsons PE, et al. The association between BMI and plasma  
11  
12  
13 357 cytokine levels in patients with acute lung injury. *Chest* 2010;138:568-77.
- 15 358 24. Stapleton RD, Suratt BT. Obesity and nutrition in acute respiratory distress syndrome. *Clin*  
16  
17 359 *Chest Med* 2014;35:655-71.
- 20 360 25. Zampieri FG, Jacob V, Barbeiro HV, et al. Influence of Body Mass Index on Inflammatory  
21  
22 361 Profile at Admission in Critically Ill Septic Patients. *Int J Inflam* 2015; 2015:734857.
- 25 362 26. Herridge MS, Cheung AM, Tansey CM, et al. One-year outcomes in survivors of the acute  
26  
27 363 respiratory distress syndrome. *N Engl J Med* 2003;348:683-93.
- 30 364 27. Wu A, Hinds CJ, Thiemermann C. High-density lipoproteins in sepsis and septic shock:  
31  
32 365 metabolism, actions, and therapeutic applications. *Shock* 2004;21:210-21.
- 35 366 28. Murch O, Collin M, Hinds CJ, et al. Lipoproteins in inflammation and sepsis. I. Basic science.  
36  
37 367 *Intensive Care Med* 2007; 33:13-24.
- 40 368 29. McGown C, Biredinc A, Younossi ZM. Adipose tissue as an endocrine organ. *Clin Liver*  
41  
42 369 *Dis* 2014;18:41-58.
- 45 370 30. Salgado DR, Rocco JR, Silva E, et al. Modulation of the renin-angiotensin-aldosterone  
46  
47 371 system in sepsis: a new therapeutic approach? *Expert Opin Ther Targets* 2010; 14:11-20.
- 50 372 31. Zhao H, Gu X, Zhao R, et al. Evaluation of prognostic scoring systems in liver cirrhosis  
51  
52 373 patients with bloodstream infection. *Medicine (Baltimore)* 2017;96(50):e8844.
- 54 374 32. Ranieri VM, Thompson BT, Barie PS, et al. Drotrecogin alfa (activated) in adults with septic

- 1  
2  
3 375 shock. *N Engl J Med* 2012;366:2055-64.  
4  
5  
6 376 33. Scheer CS, Fuchs C, Kuhn SO, et al. Quality Improvement Initiative for Severe  
7  
8 377 Sepsis and Septic Shock Reduces 90-Day Mortality: A 7.5-Year Observational Study. *Crit*  
9  
10 378 *Care Med* 2017;45:241-52.  
11  
12  
13 379 34. He XL, Liao XL, Xie ZC, et al. Pulmonary Infection Is an Independent Risk Factor for  
14  
15 380 Long-Term Mortality and Quality of Life for Sepsis Patients. *Biomed Res Int* 2016;  
16  
17 381 2016:4213712.  
18  
19  
20 382 35. O'Brien JM Jr, Philips GS, Ali NA, et al. The association between body mass index, processes  
21  
22 383 of care, and outcomes from mechanical ventilation: a prospective cohort study.  
23  
24 384 *Crit Care Med* 2012;40:1456-63.  
25  
26  
27 385 36. Waisbren E, Rosen H, Bader AM, et al. Percent body fat and prediction of surgical site  
28  
29 386 infection. *J Am Coll Surg* 2010;210:381-9.  
30  
31 387  
32  
33 388  
34  
35 389  
36  
37 390  
38  
39 391  
40  
41 392  
42  
43 393  
44  
45 394  
46  
47 395  
48  
49 396  
50  
51  
52  
53  
54  
55  
56  
57  
58  
59  
60

397 **Table 1. Comparison of demographics and clinical data between groups defined by**  
 398 **in-hospital clinical outcome in 178 patients with sepsis**

| Characteristics                      | Survivors<br>(n=104) | Non survivors<br>(n=74) | p value |
|--------------------------------------|----------------------|-------------------------|---------|
| Age (year)                           | 78.0 (60.0-84.0)     | 78.0 (69.0-84.0)        | 0.291   |
| Males                                | 67 (64.4)            | 49 (66.2)               | 0.805   |
| Body mass index (kg/m <sup>2</sup> ) | 23.2 (20.4-26.1)     | 21.7 (18.4-24.2)        | 0.006   |
| <b>Comorbidities</b>                 |                      |                         |         |
| COPD                                 | 23 (22.1)            | 9 (12.2)                | 0.088   |
| Diabetes mellitus                    | 26 (25.0)            | 21 (28.4)               | 0.614   |
| Hypertension                         | 47 (45.2)            | 31 (41.9)               | 0.662   |
| Cerebrovascular disease              | 30 (28.8)            | 15 (20.3)               | 0.194   |
| Neoplasm                             | 18 (17.3)            | 12 (16.2)               | 0.848   |
| Liver disease                        | 5 (4.8)              | 4 (5.4)                 | 1.000   |
| Heart failure                        | 20 (19.2)            | 14 (18.9)               | 0.958   |
| Chronic renal failure                | 18 (17.3)            | 11 (14.9)               | 0.664   |
| Smoking (pack years)                 | 0 (0-30.0)           | 0 (0-16.3)              | 0.509   |
| <b>Primary site of infection</b>     |                      |                         |         |
| Lung                                 | 77 (74.0)            | 54 (73.0)               | 0.874   |
| Abdomen                              | 10 (9.6)             | 5 (6.8)                 | 0.499   |
| Urinary tract                        | 7 (6.7)              | 6 (8.1)                 | 0.728   |
| Gastrointestinal tract               | 7 (6.7)              | 5 (6.8)                 | 1.000   |

|                                              |                     |                    |        |
|----------------------------------------------|---------------------|--------------------|--------|
| Other site                                   | 3 (2.9)             | 4 (5.4)            | 0.452  |
| <b>Community-acquired infection</b>          | 85 (81.7)           | 50 (67.6)          | 0.030  |
| <b>Hypotension</b>                           | 22 (21.2)           | 41 (55.4)          | <0.001 |
| <b>Lactate level (mmol/L)</b>                | 1.8 (1.0-3.4)       | 2.7 (1.5-5.7)      | 0.001  |
| <b>Oliguria</b>                              | 8 (7.7)             | 16 (21.6)          | 0.007  |
| <b>PaO<sub>2</sub>/FiO<sub>2</sub>(mmHg)</b> | 198.5 (119.3-287.5) | 152.5 (99.6-210.3) | 0.006  |
| <b>Serum Creatinine (μmol/L)</b>             | 97.0 (68.3-176.3)   | 108.5 (64.0-194.3) | 0.868  |
| <b>Total bilirubin (μmol/mL)</b>             | 13.1 (9.9-22.3)     | 18.0 (12.5-32.8)   | 0.015  |
| <b>Platelets (×10<sup>9</sup>/L)</b>         | 161.0 (95.8-232.5)  | 123.0 (75.0-204.3) | 0.067  |
| <b>INR</b>                                   | 1.2 (1.0-1.4)       | 1.3 (1.1-1.6)      | 0.015  |
| <b>Glasgow coma scale</b>                    | 15.0 (10.0-15.0)    | 13.0 (10.0-15.0)   | 0.117  |
| <b>SOFA score</b>                            | 5.0 (4.0-7.0)       | 9.0 (7.0-11.0)     | <0.001 |
| <b>APACHE II score</b>                       | 16.0 (12.0-22.0)    | 21.0 (17.0-30.0)   | <0.001 |
| <b>Septic shock</b>                          | 21 (20.2)           | 38 (51.4)          | <0.001 |
| <b>Non-invasive ventilation</b>              | 28 (26.9)           | 24 (32.4)          | 0.426  |
| <b>Intubated</b>                             | 36 (34.6)           | 43 (58.1)          | 0.002  |
| <b>Positive blood culture</b>                | 19 (18.3)           | 19 (25.7)          | 0.235  |
| <b>Length of ICU stay (days)</b>             | 12.0 (6.0-22.0)     | 12.0 (3.0-25.0)    | 0.521  |
| <b>Length of hospital stay (days)</b>        | 18.0 (10.0-30.0)    | 13.0 (3.0-25.0)    | 0.009  |

399 Data are presented as n (%) or median (interquartile range) unless stated otherwise. COPD: Chronic obstructive pulmonary disease; INR: International

400 normalized ratio; SOFA: Sequential organ failure assessment; APACHE: Acute physiology and chronic health evaluation.

401

402 **Table 2. Risk factors for 90-day mortality of patients with sepsis or septic shock by Cox**  
 403 **regression analysis**

| Variables                                 | Hazard ratio (95% Confidence interval) | p value |
|-------------------------------------------|----------------------------------------|---------|
| Body mass index (kg/m <sup>2</sup> )      | 0.940 (0.889-0.994)                    | 0.029   |
| Hypotension                               | 0.781 (0.229-2.670)                    | 0.694   |
| Lactate level (mmol/L)                    | 1.018 (0.943-1.098)                    | 0.648   |
| Oliguria                                  | 1.288 (0.715-2.321)                    | 0.399   |
| PaO <sub>2</sub> /FiO <sub>2</sub> (mmHg) | 1.000 (0.997-1.002)                    | 0.933   |
| Septic shock                              | 1.075 (0.320-3.615)                    | 0.907   |
| SOFA score                                | 1.229 (1.123-1.345)                    | <0.001  |
| APACHE II score                           | 1.050 (1.022-1.080)                    | <0.001  |
| Intubated                                 | 1.511 (0.931-2.452)                    | 0.095   |

404 SOFA: Sequential organ failure assessment; APACHE: Acute physiology and chronic health evaluation. The variables significantly associated with 90-day  
 405 non-survival in the univariate analysis were used in the Cox proportional hazard regression analysis.

406

407

408

409

410

411

412

413



414 **Table 3. Comparison of demographics and clinical data among groups defined by body mass**  
 415 **index in patients with sepsis**

| <b>Characteristics</b>           | <b>Underweight</b><br>(n=33) | <b>Normal</b><br>(n=98) | <b>Overweight</b><br>(n=36) | <b>Obese</b><br>(n=11) | <b>p value</b> |
|----------------------------------|------------------------------|-------------------------|-----------------------------|------------------------|----------------|
| <b>Age (years)</b>               | 79.0 (69.0-86.0)             | 78.0 (67.0-84.0)        | 73.0 (57.0-83.0)            | 77.0 (71.0-86.0)       | 0.162          |
| <b>Males</b>                     | 24 (72.7)                    | 70 (71.4)               | 20 (55.6)                   | 2 (18.2)               | 0.002          |
| <b>Comorbidities</b>             |                              |                         |                             |                        |                |
| COPD                             | 8(24.2)                      | 21 (21.4)               | 0                           | 3 (27.3)               | 0.017          |
| Diabetes mellitus                | 8 (24.2)                     | 25 (25.5)               | 9 (25.0)                    | 5 (45.5)               | 0.530          |
| Hypertension                     | 14 (42.4)                    | 38 (38.8)               | 19 (52.8)                   | 7 (63.6)               | 0.265          |
| Cerebrovascular disease          | 10 (30.3)                    | 24 (24.5)               | 11 (30.6)                   | 0                      | 0.193          |
| Neoplasm                         | 7 (21.2)                     | 14 (14.3)               | 8 (22.2)                    | 1 (9.1)                | 0.547          |
| Liver disease                    | 2 (6.1)                      | 5 (5.1)                 | 2 (5.6)                     | 0                      | 0.879          |
| Heart failure                    | 8 (24.2)                     | 17 (17.3)               | 5 (13.9)                    | 4 (36.4)               | 0.319          |
| Chronic renal failure            | 5 (15.2)                     | 14 (14.3)               | 7 (19.4)                    | 3 (27.3)               | 0.669          |
| <b>Smoking (pack-years)</b>      | 0 (0-20.5)                   | 0 (0-30.0)              | 0 (0-3.0)                   | 0 (0-30.0)             | 0.561          |
| <b>Primary site of infection</b> |                              |                         |                             |                        |                |
| Lung                             | 27 (81.8)                    | 69 (70.4)               | 27 (75.0)                   | 8 (72.7)               | 0.637          |
| Abdomen                          | 2 (6.1)                      | 9 (9.2)                 | 3 (8.3)                     | 1 (9.1)                | 0.956          |
| Urinary tract                    | 1 (3.0)                      | 9 (9.2)                 | 2 (5.6)                     | 1 (9.1)                | 0.656          |
| Gastrointestinal tract           | 2 (6.1)                      | 6 (6.1)                 | 3 (8.3)                     | 1 (9.1)                | 0.955          |
| Other site                       | 1 (3.0)                      | 5 (5.1)                 | 1 (2.8)                     | 0                      | 0.800          |

|                                               |                    |                    |                     |                    |       |
|-----------------------------------------------|--------------------|--------------------|---------------------|--------------------|-------|
| <b>Community-acquired infection</b>           | 25 (75.8)          | 76 (77.6)          | 26 (72.2)           | 8 (72.7)           | 0.925 |
| <b>Hypotension</b>                            | 19 (57.6)          | 34 (34.7)          | 9 (25.0)            | 1 (9.1)            | 0.007 |
| <b>Lactate level (mmol/L)</b>                 | 2.4 (1.6-7.2)      | 2.1 (1.0-4.3)      | 1.6 (1.2-3.3)       | 1.9 (0.6-2.9)      | 0.201 |
| <b>Oliguria</b>                               | 8 (24.2)           | 13 (13.3)          | 3 (8.3)             | 0                  | 0.121 |
| <b>PaO<sub>2</sub>/FiO<sub>2</sub> (mmHg)</b> | 180.0(113.5-251.0) | 164.5(102.3-240.5) | 188.0(140.5-268.5)  | 215.0(153.0-300.0) | 0.340 |
| <b>Serum Creatinine (µmol/L)</b>              | 89.0 (57.0-127.0)  | 118.5 (72.5-190.5) | 91.0 (60.0-212.5)   | 86.0 (56.0-112.0)  | 0.136 |
| <b>Total bilirubin (µmol/mL)</b>              | 18.0 (10.1-33.1)   | 14.4 (10.1-28.4)   | 17.2 (12.2-26.3)    | 15.2 (11.3-20.0)   | 0.819 |
| <b>Platelets (×10<sup>9</sup>/L)</b>          | 139.0 (75.0-213.0) | 147.0 (86.0-209.8) | 182.5 (128.3-253.8) | 115.0 (49.0-144.0) | 0.056 |
| <b>INR</b>                                    | 1.3 (1.1-1.6)      | 1.2 (1.0-1.5)      | 1.2 (1.1-1.3)       | 1.1 (1.0-1.2)      | 0.269 |
| <b>Glasgow coma scale</b>                     | 13.0 (10.0-15.0)   | 15.0 (12.0-15.0)   | 15.0 (11.0-15.0)    | 13.0 (10.0-15.0)   | 0.761 |
| <b>SOFA score</b>                             | 8.0 (5.0-11.0)     | 7.0 (5.0-9.0)      | 6.0 (4.0-8.0)       | 5.0 (5.0-8.0)      | 0.382 |
| <b>APACHE II score</b>                        | 18.0 (16.0-24.0)   | 19.0 (13.0-25.0)   | 18.0 (13.0-22.0)    | 14.0 (9.0-17.0)    | 0.060 |
| <b>Septic shock</b>                           | 19 (57.6)          | 30 (30.6)          | 9 (25.0)            | 1(9.1)             | 0.004 |
| <b>Non-invasive ventilation</b>               | 7 (21.2)           | 30 (30.6)          | 10 (27.8)           | 5 (45.5)           | 0.466 |
| <b>Intubated</b>                              | 19 (57.6)          | 43 (43.9)          | 13 (36.1)           | 4 (36.4)           | 0.305 |
| <b>Positive blood culture</b>                 | 7 (21.2)           | 24 (24.5)          | 4 (11.1)            | 3 (27.3)           | 0.383 |
| <b>Length of ICU stay (days)</b>              | 10.0 (4.0-25.0)    | 13.0 (7.0-25.0)    | 11.0 (4.0-19.0)     | 9.0(6.0-13.0)      | 0.461 |
| <b>Length of hospital stay (days)</b>         | 13.0 (4.0-29.0)    | 16.0 (10.0-28.0)   | 16.0 (8.0-32.0)     | 13.0(8.0-20.0)     | 0.813 |
| <b>In-hospital mortality</b>                  | 20 (60.6)          | 41 (41.8)          | 11 (30.6)           | 2 (18.2)           | 0.027 |
| <b>90-day mortality</b>                       | 22 (66.7)          | 47 (48.0)          | 13 (36.1)           | 2 (18.2)           | 0.015 |

416 Data are presented as n (%) or median (interquartile range). COPD: Chronic obstructive pulmonary disease; INR: International normalized ratio; SOFA:

417 Sequential organ failure assessment; APACHE: Acute physiology and chronic health evaluation.

1  
2  
3  
4 418 **Fig 1. Patient selection.**

5  
6 419

7  
8 420

9  
10 421

11  
12 422

13  
14 423

15  
16 424

17  
18 425

19  
20 426

21  
22 427

23  
24 428

25  
26 429

27  
28 430

29  
30 431

31  
32 432

33  
34 433

35  
36 434

37  
38 435

39  
40 436

41  
42 437

43  
44 438

45  
46 439

1  
2  
3  
4  
5  
6  
7  
8  
9  
10  
11  
12  
13  
14  
15  
16  
17  
18  
19  
20  
21  
22  
23  
24  
25  
26  
27  
28  
29  
30  
31  
32  
33  
34  
35  
36  
37  
38  
39  
40  
41  
42  
43  
44  
45  
46  
47  
48  
49  
50  
51  
52  
53  
54  
55  
56  
57  
58  
59  
60

440 **Fig 2. Kaplan-Meier survival plot for 90-day survival of underweight, normal weight,**  
441 **overweight, and obese patients with sepsis.**

For peer review only



39 Fig 1. Patient selection.

40 90x90mm (300 x 300 DPI)

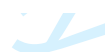



Fig 2. Kaplan-Meier survival plot for 90-day survival of underweight, normal weight, overweight, and obese patients with sepsis.

246x167mm (300 x 300 DPI)

**STROBE 2007 (v4) Statement—Checklist of items that should be included in reports of *cohort studies***

| Section/Topic                | Item # | Recommendation                                                                                                                                                                       | Reported on page # |
|------------------------------|--------|--------------------------------------------------------------------------------------------------------------------------------------------------------------------------------------|--------------------|
| Title and abstract           | 1      | (a) Indicate the study's design with a commonly used term in the title or the abstract                                                                                               | 1                  |
|                              |        | (b) Provide in the abstract an informative and balanced summary of what was done and what was found                                                                                  | 2,3                |
| <b>Introduction</b>          |        |                                                                                                                                                                                      |                    |
| Background/rationale         | 2      | Explain the scientific background and rationale for the investigation being reported                                                                                                 | 4                  |
| Objectives                   | 3      | State specific objectives, including any prespecified hypotheses                                                                                                                     | 4                  |
| <b>Methods</b>               |        |                                                                                                                                                                                      |                    |
| Study design                 | 4      | Present key elements of study design early in the paper                                                                                                                              | 4, 5               |
| Setting                      | 5      | Describe the setting, locations, and relevant dates, including periods of recruitment, exposure, follow-up, and data collection                                                      | 4, 5               |
| Participants                 | 6      | (a) Give the eligibility criteria, and the sources and methods of selection of participants. Describe methods of follow-up                                                           | 5                  |
|                              |        | (b) For matched studies, give matching criteria and number of exposed and unexposed                                                                                                  | N/A                |
| Variables                    | 7      | Clearly define all outcomes, exposures, predictors, potential confounders, and effect modifiers. Give diagnostic criteria, if applicable                                             | 5,6                |
| Data sources/<br>measurement | 8*     | For each variable of interest, give sources of data and details of methods of assessment (measurement). Describe comparability of assessment methods if there is more than one group | 6                  |
| Bias                         | 9      | Describe any efforts to address potential sources of bias                                                                                                                            | N/A                |
| Study size                   | 10     | Explain how the study size was arrived at                                                                                                                                            | N/A                |
| Quantitative variables       | 11     | Explain how quantitative variables were handled in the analyses. If applicable, describe which groupings were chosen and why                                                         | 6,7                |
| Statistical methods          | 12     | (a) Describe all statistical methods, including those used to control for confounding                                                                                                | 6,7                |
|                              |        | (b) Describe any methods used to examine subgroups and interactions                                                                                                                  | 6,7                |
|                              |        | (c) Explain how missing data were addressed                                                                                                                                          | N/A                |
|                              |        | (d) If applicable, explain how loss to follow-up was addressed                                                                                                                       | N/A                |
|                              |        | (e) Describe any sensitivity analyses                                                                                                                                                | N/A                |
| <b>Results</b>               |        |                                                                                                                                                                                      |                    |

|                          |     |                                                                                                                                                                                                              |         |
|--------------------------|-----|--------------------------------------------------------------------------------------------------------------------------------------------------------------------------------------------------------------|---------|
| Participants             | 13* | (a) Report numbers of individuals at each stage of study—eg numbers potentially eligible, examined for eligibility, confirmed eligible, included in the study, completing follow-up, and analysed            | 7,8     |
|                          |     | (b) Give reasons for non-participation at each stage                                                                                                                                                         | N/A     |
|                          |     | (c) Consider use of a flow diagram                                                                                                                                                                           | 7       |
| Descriptive data         | 14* | (a) Give characteristics of study participants (eg demographic, clinical, social) and information on exposures and potential confounders                                                                     | 7,8     |
|                          |     | (b) Indicate number of participants with missing data for each variable of interest                                                                                                                          | N/A     |
|                          |     | (c) Summarise follow-up time (eg, average and total amount)                                                                                                                                                  | 8       |
| Outcome data             | 15* | Report numbers of outcome events or summary measures over time                                                                                                                                               | 8,9     |
| Main results             | 16  | (a) Give unadjusted estimates and, if applicable, confounder-adjusted estimates and their precision (eg, 95% confidence interval). Make clear which confounders were adjusted for and why they were included | 8,19-25 |
|                          |     | (b) Report category boundaries when continuous variables were categorized                                                                                                                                    | 6       |
|                          |     | (c) If relevant, consider translating estimates of relative risk into absolute risk for a meaningful time period                                                                                             | N/A     |
| Other analyses           | 17  | Report other analyses done—eg analyses of subgroups and interactions, and sensitivity analyses                                                                                                               | N/A     |
| <b>Discussion</b>        |     |                                                                                                                                                                                                              |         |
| Key results              | 18  | Summarise key results with reference to study objectives                                                                                                                                                     | 9       |
| <b>Limitations</b>       |     |                                                                                                                                                                                                              |         |
| Interpretation           | 20  | Give a cautious overall interpretation of results considering objectives, limitations, multiplicity of analyses, results from similar studies, and other relevant evidence                                   | 12,13   |
| Generalisability         | 21  | Discuss the generalisability (external validity) of the study results                                                                                                                                        | 11      |
| <b>Other information</b> |     |                                                                                                                                                                                                              |         |
| Funding                  | 22  | Give the source of funding and the role of the funders for the present study and, if applicable, for the original study on which the present article is based                                                | 13, 14  |

\*Give information separately for cases and controls in case-control studies and, if applicable, for exposed and unexposed groups in cohort and cross-sectional studies.

**Note:** An Explanation and Elaboration article discusses each checklist item and gives methodological background and published examples of transparent reporting. The STROBE checklist is best used in conjunction with this article (freely available on the Web sites of PLoS Medicine at <http://www.plosmedicine.org/>, Annals of Internal Medicine at <http://www.annals.org/>, and Epidemiology at <http://www.epidem.com/>). Information on the STROBE Initiative is available at [www.strobe-statement.org](http://www.strobe-statement.org).



# BMJ Open

## The impact of body mass index on survival of medical patients with sepsis: a prospective cohort study in a university hospital in China

|                                 |                                                                                                                                                                                                                                                                                                                                                                                                                                                                                                                                                                                                                                                                                                                                                                                                                                                                                                                                       |
|---------------------------------|---------------------------------------------------------------------------------------------------------------------------------------------------------------------------------------------------------------------------------------------------------------------------------------------------------------------------------------------------------------------------------------------------------------------------------------------------------------------------------------------------------------------------------------------------------------------------------------------------------------------------------------------------------------------------------------------------------------------------------------------------------------------------------------------------------------------------------------------------------------------------------------------------------------------------------------|
| Journal:                        | <i>BMJ Open</i>                                                                                                                                                                                                                                                                                                                                                                                                                                                                                                                                                                                                                                                                                                                                                                                                                                                                                                                       |
| Manuscript ID                   | bmjopen-2018-021979.R3                                                                                                                                                                                                                                                                                                                                                                                                                                                                                                                                                                                                                                                                                                                                                                                                                                                                                                                |
| Article Type:                   | Research                                                                                                                                                                                                                                                                                                                                                                                                                                                                                                                                                                                                                                                                                                                                                                                                                                                                                                                              |
| Date Submitted by the Author:   | 24-Jun-2018                                                                                                                                                                                                                                                                                                                                                                                                                                                                                                                                                                                                                                                                                                                                                                                                                                                                                                                           |
| Complete List of Authors:       | Zhou, Qingtao; Peking University Third Hospital, Department of respiratory and critical care medicine<br>Wang, Meng; Peking University Third Hospital, Department of respiratory and critical care medicine<br>Li, Shuo; Peking University Third Hospital, Emergency Department<br>Zhang, Jing; Peking University Third Hospital, Department of respiratory and critical care medicine<br>Ma, Qingbian; Peking University Third Hospital, Emergency Department<br>Ding, Yanling; Peking University Third Hospital, Department of respiratory and critical care medicine<br>Ge, Hongxia; Peking University Third Hospital, Emergency Department<br>Shen, Ning; Peking University Third Hospital, Department of respiratory and critical care medicine<br>Zheng, Yaan; Peking University Third Hospital, Emergency Department<br>Sun, Yongchang; Peking University Third Hospital, Department of respiratory and critical care medicine |
| <b>Primary Subject Heading</b>: | Intensive care                                                                                                                                                                                                                                                                                                                                                                                                                                                                                                                                                                                                                                                                                                                                                                                                                                                                                                                        |
| Secondary Subject Heading:      | Infectious diseases                                                                                                                                                                                                                                                                                                                                                                                                                                                                                                                                                                                                                                                                                                                                                                                                                                                                                                                   |
| Keywords:                       | Adult intensive & critical care < INTENSIVE & CRITICAL CARE, INFECTIOUS DISEASES, THORACIC MEDICINE                                                                                                                                                                                                                                                                                                                                                                                                                                                                                                                                                                                                                                                                                                                                                                                                                                   |
|                                 |                                                                                                                                                                                                                                                                                                                                                                                                                                                                                                                                                                                                                                                                                                                                                                                                                                                                                                                                       |

SCHOLARONE™  
Manuscripts

1  
2  
3  
4 **1 The impact of body mass index on survival of medical patients with sepsis: a**  
5  
6 **2 prospective cohort study in a university hospital in China**  
7

8  
9  
10  
11  
12  
13  
14  
15  
16  
17  
18  
19  
20  
21  
22  
23  
24  
25  
26  
27  
28  
29  
30  
31  
32  
33  
34  
35  
36  
37  
38  
39  
40  
41  
42  
43  
44  
45  
46  
47  
48  
49  
50  
51  
52  
53  
54  
55  
56  
57  
58  
59  
60

3

4 Qingtao Zhou<sup>1</sup>, Meng Wang<sup>1</sup>, Shuo Li<sup>2</sup>, Jing Zhang<sup>1</sup>, Qingbian Ma<sup>2</sup>, Yanling Ding<sup>1</sup>,  
5 Hongxia Ge<sup>2</sup>, Ning Shen<sup>1</sup>, Yaan Zheng<sup>2</sup>, Yongchang Sun<sup>1\*</sup>

6  
7 <sup>1</sup> Department of Respiratory and Critical Care Medicine, Peking University Third  
8 Hospital, Beijing, China.

9 <sup>2</sup> Emergency Department, Peking University Third Hospital, Beijing, China.

10  
11 **\*Corresponding author:** Yongchang Sun, Department of Respiratory and Critical  
12 Care Medicine, Peking University Third Hospital, 49 North Garden Road, Haidian  
13 District, Beijing 100191, China. Email: suny@bjmu.edu.cn

1  
2  
3  
4  
5  
6  
7  
8  
9  
10  
11  
12  
13  
14  
15  
16  
17  
18  
19  
20  
21  
22  
23 **Abstract**

24 **Objective** To evaluate the impact of body mass index (BMI) on survival of a Chinese  
25 cohort of medical patients with sepsis.

26 **Design** A single-center prospective cohort study conducted from May 2015 to April  
27 2017.

28 **Setting** A tertiary care university hospital in China.

29 **Participants** A total of 178 patients with sepsis admitted to the medical intensive care  
30 unit (ICU) were included.

31 **Main outcome measures** The primary outcome was 90-day mortality while the  
32 secondary outcomes were in-hospital mortality, length of ICU stay, and length of  
33 hospital stay.

34 **Results** The median age (interquartile range) was 78 (66-84) years old and 77.0%  
35 patients were older than 65 years. The 90-day mortality was 47.2%. The in-hospital  
36 mortality was 41.6%, and the length of ICU stay and hospital stay were 12 (5-22) and  
37 15 (9-28) days, respectively. Cox proportional hazard regression analysis identified  
38 that sequential organ failure assessment (SOFA) score (HR = 1.229,  $p < 0.001$ ),  
39 APACHE II score (HR = 1.050,  $p < 0.001$ ) and BMI (HR = 0.940,  $p = 0.029$ ) were all  
40 independently associated with the 90-day mortality. Patients were divided into four  
41 groups based on BMI [underweight 33 (18.5%), normal 98 (55.1%), overweight 36  
42 (20.2%), and obese 11 (6.2%)]. The 90-day mortality (66.7%, 48.0%, 36.1%, and  
43 18.2%,  $p = 0.015$ ) and in-hospital mortality (60.6%, 41.8%, 30.6%, and 18.2%,  $p =$   
44 0.027) were statistically different among the four groups. Differences in survival

1  
2  
3  
4 45 among the four groups were demonstrated by Kaplan-Meier survival analysis ( $p =$   
5  
6 46 0.008), with the underweight patients showing a lower survival rate.  
7

8 47 **Conclusions** BMI was an independent factor associated with 90-day survival in a  
9  
10  
11 48 Chinese cohort of medical patients with sepsis, with patients having a lower BMI at a  
12  
13 49 higher risk of death.  
14

15  
16 50

17  
18 51 **Key words:** Sepsis; Septic shock; Body mass index; Critical care; Mortality  
19

20  
21 52

### 22 23 53 **Strengths and limitations of this study**

24  
25 54 This prospective observational cohort study focused on medical patients with sepsis  
26  
27  
28 55 and was conducted at a university hospital in China.

29  
30 56 The impact of BMI on 90-day survival of medical patients with sepsis was evaluated  
31  
32  
33 57 by Cox proportional hazard regression analysis and Kaplan-Meier survival analysis.  
34

35 58 Our analyses were limited by the use of weight ascertained at ICU admission rather  
36  
37  
38 59 than the patient's baseline outpatient body weight.  
39

40  
41 60

42  
43 61

44  
45 62

46  
47 63

48  
49 64

50  
51 65

52  
53 66  
54  
55  
56  
57  
58  
59  
60

## 67 **Introduction**

68 Sepsis is a major cause of morbidity and mortality worldwide <sup>[1]</sup>. Of these  
69 patients, half are treated in the intensive care unit (ICU) <sup>[2]</sup>. In a national  
70 population-based study of sepsis in Spain, medical diagnostic categories made up the  
71 majority of causes of sepsis, while surgical diagnoses were identified in only 26% of  
72 cases <sup>[3]</sup>.

73 Body mass index (BMI) is a simple index of weight-for-height that is commonly  
74 used to classify whether adults are underweight, overweight and obese <sup>[4]</sup>. Several  
75 studies have examined the effects of BMI on mortality with conflicting conclusions.  
76 Lower mortality in the obese has been observed in some studies <sup>[5-9]</sup>, but some  
77 researchers believe that the true paradox may lie in the variations in sepsis  
78 interventions, such as the administration of resuscitation fluids and antimicrobial  
79 therapy <sup>[6]</sup>. In other studies, morbidly obese and underweight patients have been  
80 shown to be associated with higher mortality <sup>[10,11]</sup>. Thus, the impact of BMI on  
81 survival of patients with sepsis is still controversial <sup>[12, 13]</sup>.

82 As the relationship between BMI and clinical outcomes of sepsis is complex, we  
83 therefore set out to evaluate prospectively the impact of BMI on survival in a cohort  
84 of medical patients with sepsis admitted to the medical ICU in a university hospital.

## 86 **Patients and Methods**

### 87 **Design**

88 This was a prospective cohort study, which was conducted in the medical ICU of

89 a university-affiliated urban teaching hospital in China from May 2015 to April 2017.

## 90 **Subjects**

91 Sepsis was defined as the presence (probable or documented) of infection  
92 together with systemic manifestations of infection<sup>[14]</sup>. Hospitalized patients admitted  
93 to the medical ICU with sepsis acquired in the community or in a hospital were  
94 eligible for the study if they met any of the following criteria of severe sepsis<sup>[14]</sup>: (1)  
95 sepsis-induced hypotension, (2) lactate above upper laboratory level limits  
96 (1.5mmol/L in this study), (3) urine output  $<0.5 \text{ mL Kg}^{-1} \text{ h}^{-1}$  for more than 2 h despite  
97 adequate fluid resuscitation, (4) acute lung injury with  $\text{Pao}_2/\text{Fio}_2 < 250$  in the absence  
98 of pneumonia as infection source, (5) acute lung injury with  $\text{Pao}_2/\text{Fio}_2 < 200$  in the  
99 presence of pneumonia as infection source, (6) creatinine  $>2.0 \text{ mg/dL}$  ( $176.8 \text{ } \mu\text{mol/L}$ ),  
100 (7) bilirubin  $>2\text{mg/dL}$  ( $34.2 \text{ } \mu\text{mol/L}$ ), (8) platelet count  $<100,000 \text{ } \mu\text{L}$ , and (9)  
101 coagulopathy (international normalized ratio  $>1.5$ ).

102 Patients were excluded from the study if they met one of the following criteria: (1)  
103 the patient had sepsis that required surgical treatment, or was caused by a surgical  
104 procedure related infection, (2) age  $<18$  years, (3) the patient had a positive HIV  
105 antibody titer or had known/suspected tuberculosis at baseline, (4) expected lifespan  
106  $<3$  months due to severe pre-existing comorbidities, (5) active Do Not Resuscitate or  
107 Do Not Intubate order, and (6) pregnant.

108 All patients accepted treatment according to the international guidelines for  
109 management of sepsis and septic shock<sup>[14,15]</sup>. We collected the following  
110 demographic and clinical data: patient's gender, age, weight, height, primary site of

1  
2  
3  
4 111 infection, community-acquired or hospital-acquired infection, blood pressure, lactate  
5  
6 112 level, urine output, PaO<sub>2</sub>/FiO<sub>2</sub>, serum creatinine, total bilirubin, platelets, international  
7  
8 113 normalized ratio (INR), Glasgow coma scale, SOFA score, acute physiology and  
9  
10 114 chronic health evaluation (APACHE) II score, non-invasive ventilation, intubation,  
11  
12 115 positive blood culture, length of ICU stay, and length of hospital stay. Those who  
13  
14 116 survived to discharge were followed for at least 90 days.

17  
18 117 BMI is defined as the weight in kilograms divided by the square of the height in  
19  
20 118 meters (kg/m<sup>2</sup>). Using the World Health Organization (WHO) criteria for designation  
21  
22 119 of BMI <sup>[4]</sup>, patients were classified as underweight (BMI < 18.50 kg/m<sup>2</sup>), normal  
23  
24 120 weight (BMI = 18.50 to 24.99 kg/m<sup>2</sup>), overweight (BMI = 25.0 to 29.99 kg/m<sup>2</sup>), and  
25  
26 121 obese (BMI ≥ 30.0 kg/m<sup>2</sup>).

## 30 122 **Outcomes**

31  
32  
33 123 The primary outcome was 90-day mortality, while the secondary outcomes were  
34  
35 124 in-hospital mortality, length of ICU stay, and length of hospital stay.

## 37 125 **Statistical analysis**

38  
39  
40 126 Continuous variables were expressed as median (interquartile range) and  
41  
42 127 categorical variables as numbers (%). Clinical data were compared between the  
43  
44 128 in-hospital survivors and non-survivors. Continuous variables were compared using  
45  
46 129 the non-parametric Mann–Whitney U test, and categorical variables were compared  
47  
48 130 using the Chi squared test. Cox proportional hazard regression analysis was  
49  
50 131 undertaken to assess the factors associated with 90-day mortality. The variables  
51  
52 132 significantly associated with 90-day non-survival in the univariate analysis were used  
53  
54  
55  
56  
57  
58  
59  
60

1  
2  
3  
4 133 in the Cox proportional hazard regression analysis.  
5

6 134 Patients were divided into four groups based on BMI (underweight, normal,  
7  
8 135 overweight, and obese). Clinical data were compared among the four groups, where  
9  
10 136 continuous variables were compared using the non-parametric Kruskal-Wallis H test,  
11  
12 137 and categorical variables were compared using the Chi squared test. Kaplan-Meier  
13  
14 138 survival curves were constructed to show the survival probabilities at day-90  
15  
16 139 according to BMI classification, and compared using the log rank test.  
17  
18  
19

20 140 All analyses were conducted using SPSS, version 22.0 (IBM, Armonk, NY,  
21  
22 141 USA). A p value <0.05 was considered significant.  
23  
24

#### 25 142 **Patient involvement**

26  
27  
28 143 No patients were involved in developing the hypothesis, the specific aims or the  
29  
30 144 research questions, nor were they involved in the design or implementation of this  
31  
32 145 study. No patients were involved in the interpretation of study results or write-up of  
33  
34 146 the manuscript. There are no plans to involve patients in the dissemination of results.  
35  
36  
37

38 147

#### 39 148 **Results**

40  
41  
42 149 Figure 1 shows the patient-selection process. In total, 178 medical patients with  
43  
44 150 sepsis were included in this study, with male patients accounting for 65.2% (n=116).  
45  
46 151 The median age (interquartile range) was 78 (66-84) years, and most patients were at  
47  
48 152 least 65 years old (137/178, 77.0%). The most common primary site of infection was  
49  
50 153 the lung (131 cases, 73.6%), followed by abdomen (15 cases, 8.4%), urinary tract (13  
51  
52 154 cases, 7.3%), gastrointestinal tract (12 cases, 6.7%) and other sites (7 cases, 3.9%).  
53  
54  
55  
56  
57  
58  
59  
60



1  
2  
3  
4 155 Septic shock patients accounted for 33.1% (59 cases). Blood culture was positive in  
5  
6 156 38 patients (21.3%). The 90-day mortality was 47.2% (84/178 cases), and the  
7  
8 157 in-hospital mortality was 41.6% (74/178 cases). The length of ICU stay and the length  
9  
10  
11 158 of hospital stay were 12 (5-22) and 15 (9-28) days, respectively.

12  
13 159 Compared with in-hospital survivors, non-survivors had significantly lower BMI  
14  
15 160 and PaO<sub>2</sub>/FiO<sub>2</sub> (both  $p < 0.05$ ), higher lactate, bilirubin, INR, SOFA score and  
16  
17 161 APACHE II score (all  $p < 0.05$ ). Meanwhile, more patients died with  
18  
19 162 healthcare-acquired infections, hypotension, oliguria, septic shock, and intubation (all  
20  
21 163  $p < 0.05$ ) (table 1).

22  
23  
24 164 Cox proportional hazard regression analysis was conducted and the independent  
25  
26 165 factors for 90-day death were identified as SOFA score (HR = 1.220,  $p < 0.001$ ),  
27  
28 166 APACHE II score (HR = 1.050,  $p < 0.001$ ) and BMI (HR = 0.940,  $p = 0.029$ ) (table  
29  
30  
31 167 2).

32  
33  
34 168 Patients were divided into four groups based on BMI [underweight 33 (18.5%),  
35  
36 169 normal 98 (55.1%), overweight 36 (20.2%), and obese 11 (6.2%)] . The percentage of  
37  
38 170 males (72.7%, 71.4%, 55.6%, and 18.2%,  $p = 0.002$ ), chronic obstructive  
39  
40 171 pulmonary disease (24.2%, 21.4%, 0, and 27.3%,  $p=0.017$ ), hypotension (57.6%,  
41  
42 172 34.7%, 25.0%, and 9.1%,  $p = 0.007$ ), septic shock (57.6%, 30.6%, 25.0%, and 9.1%,  
43  
44 173  $p = 0.004$ ), in-hospital mortality (60.6%, 41.8%, 30.6%, and 18.2%,  $p = 0.027$ ) and  
45  
46 174 90-day mortality (66.7%, 48.0%, 36.1%, and 18.2%,  $p = 0.015$ ) were statistically  
47  
48 175 different among the four groups (table 3).

49  
50  
51 176 Kaplan-Meier survival curves were constructed to show the survival probabilities  
52  
53  
54

1  
2  
3  
4 177 at day-90 according to BMI classification and these were compared using the log rank  
5  
6 178 test, which also showed that higher BMI was associated with better prognosis  
7  
8 179 (p=0.008) (figure 2).  
9

10  
11 180

## 12 13 181 **Discussion**

14  
15  
16 182 This prospective observational cohort study focused on medical patients with  
17  
18 183 sepsis admitted to the ICU, and the results showed that besides SOFA score and  
19  
20 184 APACHE II score, BMI was identified as an independent factor for 90-day mortality  
21  
22  
23 185 by Cox regression analysis. The association of SOFA and APACHE II score with  
24  
25 186 mortality in this cohort was consistent with previous studies<sup>[16-18]</sup>. This study adds the  
26  
27  
28 187 finding that BMI was independently associated with survival, where 90-day mortality  
29  
30 188 decreased with an increase in BMI. While studies examining the risk factors  
31  
32  
33 189 associated with outcomes in sepsis reached inconsistent conclusions on the  
34  
35 190 association of BMI with mortality, our results confirmed that BMI was independently  
36  
37  
38 191 associated with mortality in patients with sepsis caused by medical conditions.  
39

40 192 Globally, the prevalence of obesity has reached epidemic proportions, especially  
41  
42 193 in developed countries<sup>[19]</sup>. BMI is still a useful proxy of overall health because it is  
43  
44  
45 194 highly correlated with body surface area, which is commonly used as a surrogate  
46  
47  
48 195 measure in obesity classification. Even though it is widely accepted that obesity is a  
49  
50 196 risk factor for diabetes mellitus, hypertension, and cardiovascular diseases, the present  
51  
52 197 study and several other studies have indicated that overweight and obese patients with  
53  
54  
55 198 sepsis tend to experience lower mortality. This has been called the “obesity paradox”  
56  
57  
58  
59  
60

1  
2  
3  
4 199 [5-9,20]. Although some researchers have expressed doubt that the true paradox may lie  
5  
6 200 in the variations in sepsis interventions [6,21], a meta-analysis concluded that  
7  
8 201 individuals who were overweight or obese had a reduced adjusted mortality when  
9  
10 202 admitted to the ICU with sepsis or septic shock [8]. Recently another meta-analysis  
11  
12 203 also concluded that being overweight was associated with lower mortality (OR 0.87,  
13  
14 204 95% CI 0.77-0.97,  $p = 0.02$ ) compared with obese (OR 0.89, 95% CI 0.72-1.10,  $p =$   
15  
16 205 0.29) and morbidly obese (OR 0.64, 95% CI 0.38-1.08,  $p = 0.09$ ) patients who did not  
17  
18 206 exhibit significantly reduced mortality compared with normal weight patients [12]. In a  
19  
20 207 large and nationally representative sample of over 1,000 hospitals in the US, obesity  
21  
22 208 was found to be significantly associated with a 16% decrease in the odds of dying  
23  
24 209 among sepsis patients who were hospitalized [22].

25  
26  
27  
28  
29  
30 210 Underweight patients with sepsis may be more common in developing countries  
31  
32 211 than in developed countries. In the present study, the percentages of underweight,  
33  
34 212 normal weight, overweight and obese patients were 18.4%, 55.3%, 20.1%, and 6.1%,  
35  
36 213 respectively, while those with sepsis in a study in Canada and the US represented  
37  
38 214 6.8%, 35.3%, 28.3%, and 29.0% [6]. Being underweight was found to be one of the  
39  
40 215 independent risk factors of mortality in a study on the correlation between surgical  
41  
42 216 site infection and mortality [10]. Furthermore, Lee et al [11] also reported that being  
43  
44 217 underweight was associated with mortality in patients with severe sepsis and septic  
45  
46 218 shock. However, BMI has not been shown to be an independent factor for clinical  
47  
48 219 outcomes by multivariable analyses. In our cohort of medical patients with sepsis,  
49  
50 220 which mainly included elderly and less obese patients, BMI was identified as an

1  
2  
3  
4 221 independent factor for survival, patients with lower BMI having a higher risk of death.  
5  
6 222 Thus, our findings would be helpful for evaluating the clinical outcomes of medical  
7  
8 223 patients with sepsis, although validation in future large sample, multi-center studies is  
9  
10  
11 224 still needed.

12  
13 225 The mechanism of the correlation between BMI and mortality of sepsis is unclear.  
14  
15 226 There are several potential reasons that could explain this. First, higher BMI resulted  
16  
17  
18 227 in more fat reserves, and patients could have a greater capacity to cope with the  
19  
20 228 inflammatory response during sepsis and sepsis-associated acute lung injury [23-25].  
21  
22  
23 229 Furthermore, they may be able to tolerate extensive weight loss and dysfunction  
24  
25 230 associated with critical illness [26]. Secondly, a higher BMI can lead to an increased  
26  
27  
28 231 level of lipoproteins. High-density lipoproteins may not only bind and inactivate  
29  
30 232 lipopolysaccharide (LPS) or other harmful bacterial products released during sepsis  
31  
32 233 [27], but also modulate adhesion molecule expression, upregulate endothelial nitric  
33  
34  
35 234 oxide synthase, and counteract oxidative stress [28]. Thirdly, higher BMI can lead to  
36  
37  
38 235 increased adipose tissue deposition. Adipose tissue is increasingly being considered as  
39  
40 236 a functional endocrine organ and associated with increased renin-angiotensin system  
41  
42 237 activity [29]. It appears to have protective hemodynamic effects during sepsis and may  
43  
44  
45 238 decrease the need for fluid or vasopressor support [21,30].

46  
47 239 In general, sex has not been found to be an independent predictor for survival in  
48  
49  
50 240 patients with sepsis, which is the same as the results of our current study. But in some  
51  
52 241 special populations, for example in liver cirrhosis patients with bloodstream infection,  
53  
54  
55 242 male sex may be an independent risk factor for mortality[31].  
56  
57  
58  
59  
60

1  
2  
3  
4 243 As the relationship between BMI and clinical outcomes of sepsis may be related  
5  
6 244 partly to differences in patient characteristics, we therefore set out to evaluate the  
7  
8 245 impact of BMI on survival in a cohort of medical patients with sepsis, which is  
9  
10 246 different from surgical septic patients. Ranieri et al<sup>[32]</sup> reported that the primary sites  
11  
12 247 of infection in adults with septic shock were lung (43.9%), abdomen (30.0%), urinary  
13  
14 248 tract (12.3%), skin (5.5%) and other sites (8.3%). Scheer et al<sup>[33]</sup> found that the most  
15  
16 249 common primary site of infection was different between medical and surgical patients.  
17  
18 250 In medical patients, the lung was the most common primary site (42.0%-56.7%),  
19  
20 251 while it was abdomen (48.4%-64.4%) in surgical patients. It should be noted that in  
21  
22 252 the majority of our patients (73.6%), sepsis was associated with pulmonary infection,  
23  
24 253 a much higher percentage as compared to other studies. He et al<sup>[34]</sup> reported that  
25  
26 254 pulmonary-sepsis showed worse outcome than abdominal-sepsis, and pulmonary  
27  
28 255 infection was a risk factor for one-year mortality and quality of life after sepsis.

29  
30  
31  
32  
33  
34  
35 256 There were several limitations to our study. Firstly, the BMI of our patients  
36  
37 257 ranged from 12.11 to 32.46. There was no morbidly obese patient in the current study.  
38  
39 258 In fact, morbidly obese people are rare in this country. 10 severely underweight  
40  
41 259 patients with BMI less than 16.0 were included in the present study, which introduces  
42  
43 260 possible sample bias in patients in the low BMI category. However, the 90-day and  
44  
45 261 in-hospital mortality of these 10 severely underweight patients were 70.0% and 60.0%  
46  
47 262 respectively, not significantly different from that of all 33 underweight patients  
48  
49 263 (66.7% and 60.6%, respectively). Secondly, the present study used weight ascertained  
50  
51 264 at ICU admission, rather than the patient's baseline outpatient body weight. This  
52  
53  
54  
55  
56  
57  
58  
59  
60

1  
2  
3  
4 265 practice may misclassify the BMI category in as many as 21.9% of patients due to  
5  
6 266 lack of fluid balance adjustment <sup>[35]</sup>. Thirdly, BMI was used to determine the  
7  
8 267 nutritional status of patients in this study. BMI is a simple index and widely used in  
9  
10  
11 268 clinical practice, but other indices such as percent body fat might better reflect body  
12  
13 269 composition<sup>[36]</sup>. Lastly, it was a single-center study with 178 participants, and a large  
14  
15  
16 270 proportion of our patients were older than 65 years, which may have led to a  
17  
18 271 sample-related bias.

## 272 **Conclusions**

273 To our knowledge, this is the first prospective cohort study that focused on  
24  
25 274 medical patients with sepsis, showing that BMI was independently associated with  
26  
27  
28 275 90-day survival, with patients having a lower BMI at a higher risk of death.

276

## 277 **Acknowledgements**

278 Not applicable.

279

## 280 **Authors' contributions**

281 QTZ, YCS, YAZ designed the study. QTZ, YCS, NS, YAZ, and QBM coordinated the  
282 study. MW, JZ, YLD, SL, and HXG were responsible for patient screening,  
283 enrollment, and follow-up. QTZ, MW, and YCS analyzed the data. QTZ drafted the  
284 manuscript. YCS critically revised the manuscript. All authors had full access to all  
285 study data, read and approved the final version of the manuscript.

286

1  
2  
3  
4 287 **Funding**

5  
6 288 None.

7  
8  
9 289

10  
11 290 **Competing interests**

12  
13 291 None declared.

14  
15  
16 292

17  
18 293 **Ethics approval and consent to participate**

19  
20 294 The study protocol was approved (approval number M2015021) by the ethics  
21  
22 295 committee of Peking University Third Hospital, Beijing, China. All patients or their  
23  
24 296 legally authorized representatives provided written informed consent to participate in  
25  
26 297 the study.  
27  
28  
29

30  
31 298

32  
33 299 **Data sharing statement**

34  
35 300 The authors declare that all data supporting the findings of this study are available  
36  
37 301 within the article.  
38  
39

40  
41 302

42  
43 303 **References**

- 44  
45 304 1. Singer M, Deutschman CS, Seymour CW, et al. The Third International Consensus  
46  
47 305 Definitions for Sepsis and Septic Shock (Sepsis-3). *JAMA* 2016;315:801-10.  
48  
49 306 2. Angus DC, van der Poll T. Severe sepsis and septic shock. *N Engl J Med* 2013;369:2063.  
50  
51 307 3. Bouza C, López-Cuadrado T, Saz-Parkinson Z, et al. Epidemiology and recent trends of  
52  
53 308 severe sepsis in Spain: a nationwide population-based analysis (2006-2011). *BMC Infect Dis*  
54  
55  
56  
57  
58  
59

- 1  
2  
3  
4 309 2014; 14:3863.  
5  
6 310 4. WHO classification of body mass index (BMI). [http://apps.who.int/bmi/index.jsp?introPage=  
7  
8 311 intro\_3.html] Accessed on 2 March 2015.  
9  
10  
11 312 5. Wurzinger B, Dünser MW, Wohlmuth C, et al. The association between body-mass index and  
12  
13 313 patient outcome in septic shock: a retrospective cohort study. *Wien Klin Wochenschr* 2010;122:  
14  
15 314 31-6.  
16  
17  
18 315 6. Arabi YM, Dara SI, Tamim HM, et al. Clinical characteristics, sepsis interventions and  
19  
20 316 outcomes in the obese patients with septic shock:an international multicenter cohort study.  
21  
22  
23 317 *Crit Care* 2013;17:R72.  
24  
25  
26 318 7. Prescott HC, Chang VW, O'Brien JM Jr, et al. Obesity and 1-year outcomes in older  
27  
28 319 Americans with severe sepsis. *Crit Care Med* 2014;42:1766-74.  
29  
30  
31 320 8. Pepper DJ, Sun J, Welsh J, et al. Increased body mass index and adjusted mortality in ICU  
32  
33 321 patients with sepsis or septic shock:a systematic review and meta-analysis. *Crit Care*  
34  
35 322 2016;20:181.  
36  
37  
38 323 9. Gaulton TG, Marshall MacNabb C, Mikkelsen ME, et al. A retrospective cohort study  
39  
40 324 examining the association between body mass index and mortality in severe sepsis. *Intern*  
41  
42 325 *Emerg Med* 2015;10:471-9.  
43  
44  
45 326 10. Giles KA, Hamdan AD, Pomposelli FB, et al. Body mass index:surgical site infections and  
46  
47 327 mortality after lower extremity bypass from the National Surgical Quality Improvement  
48  
49 328 Program 2005-2007. *Ann Vasc Surg* 2010;24:48-56.  
50  
51  
52 329 11. Lee SM, Kang JW, Jo YH, et al. Underweight is associated with mortality in patients with  
53  
54 330 severe sepsis and septic shock. *Intensive Care Med Exp* 2015; 3:A876.  
55  
56  
57  
58  
59  
60



- 1  
2  
3  
4 331 12. Wang S, Liu X, Chen Q, et al. The role of increased body mass index in outcomes of sepsis: a  
5  
6 332 systematic review and meta-analysis. *BMC Anesthesiol* 2017;17:118.  
7  
8 333 13. Ng PY, Eikermann M. The obesity conundrum in sepsis. *BMC Anesthesiol* 2017;17:147.  
9  
10 334 14. Dellinger RP, Levy MM, Rhodes A, et al. Surviving sepsis campaign: international guidelines  
11  
12 335 for management of severe sepsis and septic shock: 2012. *Crit Care Med* 2013;41:580-637.  
13  
14  
15 336 15. Rhodes A, Evans LE, Alhazzani W, et al. Surviving Sepsis Campaign: International  
16  
17 337 Guidelines for Management of Sepsis and Septic Shock: 2016. *Intensive Care Med* 2017;  
18  
19 338 43:304-77.  
20  
21  
22 339 16. de Carvalho MA, Freitas FG, Silva Junior HT, et al. Mortality predictors in renal transplant  
23  
24 340 recipients with severe sepsis and septic shock. *PLoS One* 2014;9:e111610.  
25  
26  
27 341 17. Innocenti F, Tozzi C, Donnini C, et al. SOFA score in septic patients: incremental prognostic  
28  
29 342 value over age, comorbidities, and parameters of sepsis severity. *Intern Emerg*  
30  
31 343 *Med* 2018;13:405-12.  
32  
33  
34 344 18. Song JE, Kim MH, Jeong WY, et al. Mortality Risk Factors for Patients with Septic  
35  
36 345 Shock after Implementation of the Surviving Sepsis Campaign Bundles. *Infect*  
37  
38 346 *Chemother* 2016;48:199-208.  
39  
40  
41 347 19. GBD 2015 Obesity Collaborators, Afshin A, Forouzanfar MH, et al. Health Effects of  
42  
43 348 Overweight and Obesity in 195 Countries over 25 Years. *N Engl J Med* 2017;377:13-27.  
44  
45  
46 349 20. Atamna A, Elis A, Gilady E, et al. How obesity impacts outcomes of infectious diseases. *Eur*  
47  
48 350 *J Clin Microbiol Infect Dis* 2017; 36:585-91.  
49  
50  
51 351 21. Taylor SP, Karvetski CH, Templin MA, et al. Initial fluid resuscitation following adjusted  
52  
53 352 body weight dosing is associated with improved mortality in obese patients with suspected  
54  
55  
56  
57  
58  
59  
60

- 1  
2  
3  
4 353 septic shock. *J Crit Care* 2018;43:7-12.  
5  
6 354 22. Nguyen AT, Tsai CL, Hwang LY, et al. Obesity and Mortality, Length of Stay and Hospital  
7  
8 355 Cost among Patients with Sepsis: A Nationwide Inpatient Retrospective Cohort Study. *PLoS*  
9  
10 356 *One* 2016; 11:e0154599.  
11  
12  
13 357 23. Stapleton RD, Dixon AE, Parsons PE, et al. The association between BMI and plasma  
14  
15 358 cytokine levels in patients with acute lung injury. *Chest* 2010;138:568-77.  
16  
17  
18 359 24. Stapleton RD, Suratt BT. Obesity and nutrition in acute respiratory distress syndrome. *Clin*  
19  
20 360 *Chest Med* 2014;35:655-71.  
21  
22  
23 361 25. Zampieri FG, Jacob V, Barbeiro HV, et al. Influence of Body Mass Index on Inflammatory  
24  
25 362 Profile at Admission in Critically Ill Septic Patients. *Int J Inflam* 2015; 2015:734857.  
26  
27  
28 363 26. Herridge MS, Cheung AM, Tansey CM, et al. One-year outcomes in survivors of the acute  
29  
30 364 respiratory distress syndrome. *N Engl J Med* 2003;348:683-93.  
31  
32  
33 365 27. Wu A, Hinds CJ, Thiemermann C. High-density lipoproteins in sepsis and septic shock:  
34  
35 366 metabolism, actions, and therapeutic applications. *Shock* 2004;21:210-21.  
36  
37  
38 367 28. Murch O, Collin M, Hinds CJ, et al. Lipoproteins in inflammation and sepsis. I. Basic science.  
39  
40 368 *Intensive Care Med* 2007; 33:13-24.  
41  
42  
43 369 29. McGown C, Bierendinc A, Younossi ZM. Adipose tissue as an endocrine organ. *Clin Liver*  
44  
45 370 *Dis* 2014;18:41-58.  
46  
47  
48 371 30. Salgado DR, Rocco JR, Silva E, et al. Modulation of the renin-angiotensin-aldosterone  
49  
50 372 system in sepsis: a new therapeutic approach? *Expert Opin Ther Targets* 2010; 14:11-20.  
51  
52  
53 373 31. Zhao H, Gu X, Zhao R, et al. Evaluation of prognostic scoring systems in liver cirrhosis  
54  
55 374 patients with bloodstream infection. *Medicine (Baltimore)* 2017;96(50):e8844.  
56  
57  
58  
59  
60

- 1  
2  
3  
4 375 32. Ranieri VM, Thompson BT, Barie PS, et al. Drotrecogin alfa (activated) in adults with septic  
5  
6 376 shock. *N Engl J Med* 2012;366:2055-64.  
7  
8 377 33. Scheer CS, Fuchs C, Kuhn SO, et al. Quality Improvement Initiative for Severe  
9  
10 378 Sepsis and Septic Shock Reduces 90-Day Mortality: A 7.5-Year Observational Study. *Crit*  
11  
12 *Care Med* 2017;45:241-52.  
13 379  
14  
15 380 34. He XL, Liao XL, Xie ZC, et al. Pulmonary Infection Is an Independent Risk Factor for  
16  
17 Long-Term Mortality and Quality of Life for Sepsis Patients. *Biomed Res Int* 2016;  
18 381  
19 2016:4213712.  
20 382  
21  
22 383 35. O'Brien JM Jr, Philips GS, Ali NA, et al. The association between body mass index, processes  
23  
24 of care, and outcomes from mechanical ventilation: a prospective cohort study.  
25 384  
26 *Crit Care Med* 2012;40:1456-63.  
27 385  
28  
29 386 36. Waisbren E, Rosen H, Bader AM, et al. Percent body fat and prediction of surgical site  
30  
31 infection. *J Am Coll Surg* 2010;210:381-9.  
32 387  
33  
34 388  
35  
36 389  
37  
38 390  
39  
40 391  
41  
42 392  
43  
44 393  
45  
46 394  
47  
48 395  
49  
50 396  
51  
52  
53  
54  
55  
56  
57  
58  
59  
60

397 **Table 1. Comparison of demographics and clinical data between groups defined by**  
 398 **in-hospital clinical outcome in 178 patients with sepsis**

| Characteristics                      | Survivors<br>(n=104) | Non survivors<br>(n=74) | p value |
|--------------------------------------|----------------------|-------------------------|---------|
| Age (year)                           | 78.0 (60.0-84.0)     | 78.0 (69.0-84.0)        | 0.291   |
| Males                                | 67 (64.4)            | 49 (66.2)               | 0.805   |
| Body mass index (kg/m <sup>2</sup> ) | 23.2 (20.4-26.1)     | 21.7 (18.4-24.2)        | 0.006   |
| <b>Comorbidities</b>                 |                      |                         |         |
| COPD                                 | 23 (22.1)            | 9 (12.2)                | 0.088   |
| Diabetes mellitus                    | 26 (25.0)            | 21 (28.4)               | 0.614   |
| Hypertension                         | 47 (45.2)            | 31 (41.9)               | 0.662   |
| Cerebrovascular disease              | 30 (28.8)            | 15 (20.3)               | 0.194   |
| Neoplasm                             | 18 (17.3)            | 12 (16.2)               | 0.848   |
| Liver disease                        | 5 (4.8)              | 4 (5.4)                 | 1.000   |
| Heart failure                        | 20 (19.2)            | 14 (18.9)               | 0.958   |
| Chronic renal failure                | 18 (17.3)            | 11 (14.9)               | 0.664   |
| Smoking (pack years)                 | 0 (0-30.0)           | 0 (0-16.3)              | 0.509   |
| <b>Primary site of infection</b>     |                      |                         |         |
| Lung                                 | 77 (74.0)            | 54 (73.0)               | 0.874   |
| Abdomen                              | 10 (9.6)             | 5 (6.8)                 | 0.499   |
| Urinary tract                        | 7 (6.7)              | 6 (8.1)                 | 0.728   |
| Gastrointestinal tract               | 7 (6.7)              | 5 (6.8)                 | 1.000   |

|                                              |                     |                    |        |
|----------------------------------------------|---------------------|--------------------|--------|
| Other site                                   | 3 (2.9)             | 4 (5.4)            | 0.452  |
| <b>Community-acquired infection</b>          | 85 (81.7)           | 50 (67.6)          | 0.030  |
| <b>Hypotension</b>                           | 22 (21.2)           | 41 (55.4)          | <0.001 |
| <b>Lactate level (mmol/L)</b>                | 1.8 (1.0-3.4)       | 2.7 (1.5-5.7)      | 0.001  |
| <b>Oliguria</b>                              | 8 (7.7)             | 16 (21.6)          | 0.007  |
| <b>PaO<sub>2</sub>/FiO<sub>2</sub>(mmHg)</b> | 198.5 (119.3-287.5) | 152.5 (99.6-210.3) | 0.006  |
| <b>Serum Creatinine (μmol/L)</b>             | 97.0 (68.3-176.3)   | 108.5 (64.0-194.3) | 0.868  |
| <b>Total bilirubin (μmol/mL)</b>             | 13.1 (9.9-22.3)     | 18.0 (12.5-32.8)   | 0.015  |
| <b>Platelets (×10<sup>9</sup>/L)</b>         | 161.0 (95.8-232.5)  | 123.0 (75.0-204.3) | 0.067  |
| <b>INR</b>                                   | 1.2 (1.0-1.4)       | 1.3 (1.1-1.6)      | 0.015  |
| <b>Glasgow coma scale</b>                    | 15.0 (10.0-15.0)    | 13.0 (10.0-15.0)   | 0.117  |
| <b>SOFA score</b>                            | 5.0 (4.0-7.0)       | 9.0 (7.0-11.0)     | <0.001 |
| <b>APACHE II score</b>                       | 16.0 (12.0-22.0)    | 21.0 (17.0-30.0)   | <0.001 |
| <b>Septic shock</b>                          | 21 (20.2)           | 38 (51.4)          | <0.001 |
| <b>Non-invasive ventilation</b>              | 28 (26.9)           | 24 (32.4)          | 0.426  |
| <b>Intubated</b>                             | 36 (34.6)           | 43 (58.1)          | 0.002  |
| <b>Positive blood culture</b>                | 19 (18.3)           | 19 (25.7)          | 0.235  |
| <b>Length of ICU stay (days)</b>             | 12.0 (6.0-22.0)     | 12.0 (3.0-25.0)    | 0.521  |
| <b>Length of hospital stay (days)</b>        | 18.0 (10.0-30.0)    | 13.0 (3.0-25.0)    | 0.009  |

399 Data are presented as n (%) or median (interquartile range) unless stated otherwise. COPD: Chronic obstructive pulmonary disease; INR: International

400 normalized ratio; SOFA: Sequential organ failure assessment; APACHE: Acute physiology and chronic health evaluation.

401

402 **Table 2. Risk factors for 90-day mortality of patients with sepsis or septic shock by Cox**  
 403 **regression analysis**

| Variables                                 | Hazard ratio (95% Confidence interval) | p value |
|-------------------------------------------|----------------------------------------|---------|
| Body mass index (kg/m <sup>2</sup> )      | 0.940 (0.889-0.994)                    | 0.029   |
| Hypotension                               | 0.781 (0.229-2.670)                    | 0.694   |
| Lactate level (mmol/L)                    | 1.018 (0.943-1.098)                    | 0.648   |
| Oliguria                                  | 1.288 (0.715-2.321)                    | 0.399   |
| PaO <sub>2</sub> /FiO <sub>2</sub> (mmHg) | 1.000 (0.997-1.002)                    | 0.933   |
| Septic shock                              | 1.075 (0.320-3.615)                    | 0.907   |
| SOFA score                                | 1.229 (1.123-1.345)                    | <0.001  |
| APACHE II score                           | 1.050 (1.022-1.080)                    | <0.001  |
| Intubated                                 | 1.511 (0.931-2.452)                    | 0.095   |

404 SOFA: Sequential organ failure assessment; APACHE: Acute physiology and chronic health evaluation. The variables significantly associated with 90-day  
 405 non-survival in the univariate analysis were used in the Cox proportional hazard regression analysis.

406

407

408

409

410

411

412

413

414 **Table 3. Comparison of demographics and clinical data among groups defined by body mass**  
 415 **index in patients with sepsis**

| <b>Characteristics</b>           | <b>Underweight</b><br>(n=33) | <b>Normal</b><br>(n=98) | <b>Overweight</b><br>(n=36) | <b>Obese</b><br>(n=11) | <b>p value</b> |
|----------------------------------|------------------------------|-------------------------|-----------------------------|------------------------|----------------|
| <b>Age (years)</b>               | 79.0 (69.0-86.0)             | 78.0 (67.0-84.0)        | 73.0 (57.0-83.0)            | 77.0 (71.0-86.0)       | 0.162          |
| <b>Males</b>                     | 24 (72.7)                    | 70 (71.4)               | 20 (55.6)                   | 2 (18.2)               | 0.002          |
| <b>Comorbidities</b>             |                              |                         |                             |                        |                |
| COPD                             | 8(24.2)                      | 21 (21.4)               | 0                           | 3 (27.3)               | 0.017          |
| Diabetes mellitus                | 8 (24.2)                     | 25 (25.5)               | 9 (25.0)                    | 5 (45.5)               | 0.530          |
| Hypertension                     | 14 (42.4)                    | 38 (38.8)               | 19 (52.8)                   | 7 (63.6)               | 0.265          |
| Cerebrovascular disease          | 10 (30.3)                    | 24 (24.5)               | 11 (30.6)                   | 0                      | 0.193          |
| Neoplasm                         | 7 (21.2)                     | 14 (14.3)               | 8 (22.2)                    | 1 (9.1)                | 0.547          |
| Liver disease                    | 2 (6.1)                      | 5 (5.1)                 | 2 (5.6)                     | 0                      | 0.879          |
| Heart failure                    | 8 (24.2)                     | 17 (17.3)               | 5 (13.9)                    | 4 (36.4)               | 0.319          |
| Chronic renal failure            | 5 (15.2)                     | 14 (14.3)               | 7 (19.4)                    | 3 (27.3)               | 0.669          |
| <b>Smoking (pack-years)</b>      | 0 (0-20.5)                   | 0 (0-30.0)              | 0 (0-3.0)                   | 0 (0-30.0)             | 0.561          |
| <b>Primary site of infection</b> |                              |                         |                             |                        |                |
| Lung                             | 27 (81.8)                    | 69 (70.4)               | 27 (75.0)                   | 8 (72.7)               | 0.637          |
| Abdomen                          | 2 (6.1)                      | 9 (9.2)                 | 3 (8.3)                     | 1 (9.1)                | 0.956          |
| Urinary tract                    | 1 (3.0)                      | 9 (9.2)                 | 2 (5.6)                     | 1 (9.1)                | 0.656          |
| Gastrointestinal tract           | 2 (6.1)                      | 6 (6.1)                 | 3 (8.3)                     | 1 (9.1)                | 0.955          |
| Other site                       | 1 (3.0)                      | 5 (5.1)                 | 1 (2.8)                     | 0                      | 0.800          |

|                                               |                    |                    |                     |                    |       |
|-----------------------------------------------|--------------------|--------------------|---------------------|--------------------|-------|
| <b>Community-acquired infection</b>           | 25 (75.8)          | 76 (77.6)          | 26 (72.2)           | 8 (72.7)           | 0.925 |
| <b>Hypotension</b>                            | 19 (57.6)          | 34 (34.7)          | 9 (25.0)            | 1 (9.1)            | 0.007 |
| <b>Lactate level (mmol/L)</b>                 | 2.4 (1.6-7.2)      | 2.1 (1.0-4.3)      | 1.6 (1.2-3.3)       | 1.9 (0.6-2.9)      | 0.201 |
| <b>Oliguria</b>                               | 8 (24.2)           | 13 (13.3)          | 3 (8.3)             | 0                  | 0.121 |
| <b>PaO<sub>2</sub>/FiO<sub>2</sub> (mmHg)</b> | 180.0(113.5-251.0) | 164.5(102.3-240.5) | 188.0(140.5-268.5)  | 215.0(153.0-300.0) | 0.340 |
| <b>Serum Creatinine (µmol/L)</b>              | 89.0 (57.0-127.0)  | 118.5 (72.5-190.5) | 91.0 (60.0-212.5)   | 86.0 (56.0-112.0)  | 0.136 |
| <b>Total bilirubin (µmol/mL)</b>              | 18.0 (10.1-33.1)   | 14.4 (10.1-28.4)   | 17.2 (12.2-26.3)    | 15.2 (11.3-20.0)   | 0.819 |
| <b>Platelets (×10<sup>9</sup>/L)</b>          | 139.0 (75.0-213.0) | 147.0 (86.0-209.8) | 182.5 (128.3-253.8) | 115.0 (49.0-144.0) | 0.056 |
| <b>INR</b>                                    | 1.3 (1.1-1.6)      | 1.2 (1.0-1.5)      | 1.2 (1.1-1.3)       | 1.1 (1.0-1.2)      | 0.269 |
| <b>Glasgow coma scale</b>                     | 13.0 (10.0-15.0)   | 15.0 (12.0-15.0)   | 15.0 (11.0-15.0)    | 13.0 (10.0-15.0)   | 0.761 |
| <b>SOFA score</b>                             | 8.0 (5.0-11.0)     | 7.0 (5.0-9.0)      | 6.0 (4.0-8.0)       | 5.0 (5.0-8.0)      | 0.382 |
| <b>APACHE II score</b>                        | 18.0 (16.0-24.0)   | 19.0 (13.0-25.0)   | 18.0 (13.0-22.0)    | 14.0 (9.0-17.0)    | 0.060 |
| <b>Septic shock</b>                           | 19 (57.6)          | 30 (30.6)          | 9 (25.0)            | 1(9.1)             | 0.004 |
| <b>Non-invasive ventilation</b>               | 7 (21.2)           | 30 (30.6)          | 10 (27.8)           | 5 (45.5)           | 0.466 |
| <b>Intubated</b>                              | 19 (57.6)          | 43 (43.9)          | 13 (36.1)           | 4 (36.4)           | 0.305 |
| <b>Positive blood culture</b>                 | 7 (21.2)           | 24 (24.5)          | 4 (11.1)            | 3 (27.3)           | 0.383 |
| <b>Length of ICU stay (days)</b>              | 10.0 (4.0-25.0)    | 13.0 (7.0-25.0)    | 11.0 (4.0-19.0)     | 9.0(6.0-13.0)      | 0.461 |
| <b>Length of hospital stay (days)</b>         | 13.0 (4.0-29.0)    | 16.0 (10.0-28.0)   | 16.0 (8.0-32.0)     | 13.0(8.0-20.0)     | 0.813 |
| <b>In-hospital mortality</b>                  | 20 (60.6)          | 41 (41.8)          | 11 (30.6)           | 2 (18.2)           | 0.027 |
| <b>90-day mortality</b>                       | 22 (66.7)          | 47 (48.0)          | 13 (36.1)           | 2 (18.2)           | 0.015 |

416 Data are presented as n (%) or median (interquartile range). COPD: Chronic obstructive pulmonary disease; INR: International normalized ratio; SOFA:

417 Sequential organ failure assessment; APACHE: Acute physiology and chronic health evaluation.



1  
2  
3  
4 418 **Fig 1. Patient selection.**

5  
6 419

7  
8 420

9  
10 421

11  
12 422

13  
14 423

15  
16 424

17  
18 425

19  
20 426

21  
22 427

23  
24 428

25  
26 429

27  
28 430

29  
30 431

31  
32 432

33  
34 433

35  
36 434

37  
38 435

39  
40 436

41  
42 437

43  
44 438

45  
46 439

1  
2  
3  
4  
5  
6  
7  
8  
9  
10  
11  
12  
13  
14  
15  
16  
17  
18  
19  
20  
21  
22  
23  
24  
25  
26  
27  
28  
29  
30  
31  
32  
33  
34  
35  
36  
37  
38  
39  
40  
41  
42  
43  
44  
45  
46  
47  
48  
49  
50  
51  
52  
53  
54  
55  
56  
57  
58  
59  
60

440 **Fig 2. Kaplan-Meier survival plot for 90-day survival of underweight, normal weight,**  
441 **overweight, and obese patients with sepsis.**

For peer review only



Fig 1. Patient selection.

90x90mm (300 x 300 DPI)



Fig 2. Kaplan-Meier survival plot for 90-day survival of underweight, normal weight, overweight, and obese patients with sepsis.

246x167mm (300 x 300 DPI)

**STROBE 2007 (v4) Statement—Checklist of items that should be included in reports of *cohort studies***

| Section/Topic                | Item # | Recommendation                                                                                                                                                                       | Reported on page # |
|------------------------------|--------|--------------------------------------------------------------------------------------------------------------------------------------------------------------------------------------|--------------------|
| Title and abstract           | 1      | (a) Indicate the study's design with a commonly used term in the title or the abstract                                                                                               | 1                  |
|                              |        | (b) Provide in the abstract an informative and balanced summary of what was done and what was found                                                                                  | 2,3                |
| <b>Introduction</b>          |        |                                                                                                                                                                                      |                    |
| Background/rationale         | 2      | Explain the scientific background and rationale for the investigation being reported                                                                                                 | 4                  |
| Objectives                   | 3      | State specific objectives, including any prespecified hypotheses                                                                                                                     | 4                  |
| <b>Methods</b>               |        |                                                                                                                                                                                      |                    |
| Study design                 | 4      | Present key elements of study design early in the paper                                                                                                                              | 4, 5               |
| Setting                      | 5      | Describe the setting, locations, and relevant dates, including periods of recruitment, exposure, follow-up, and data collection                                                      | 4, 5               |
| Participants                 | 6      | (a) Give the eligibility criteria, and the sources and methods of selection of participants. Describe methods of follow-up                                                           | 5                  |
|                              |        | (b) For matched studies, give matching criteria and number of exposed and unexposed                                                                                                  | N/A                |
| Variables                    | 7      | Clearly define all outcomes, exposures, predictors, potential confounders, and effect modifiers. Give diagnostic criteria, if applicable                                             | 5,6                |
| Data sources/<br>measurement | 8*     | For each variable of interest, give sources of data and details of methods of assessment (measurement). Describe comparability of assessment methods if there is more than one group | 6,7                |
| Bias                         | 9      | Describe any efforts to address potential sources of bias                                                                                                                            | N/A                |
| Study size                   | 10     | Explain how the study size was arrived at                                                                                                                                            | N/A                |
| Quantitative variables       | 11     | Explain how quantitative variables were handled in the analyses. If applicable, describe which groupings were chosen and why                                                         | 6,7                |
| Statistical methods          | 12     | (a) Describe all statistical methods, including those used to control for confounding                                                                                                | 6,7                |
|                              |        | (b) Describe any methods used to examine subgroups and interactions                                                                                                                  | 6,7                |
|                              |        | (c) Explain how missing data were addressed                                                                                                                                          | N/A                |
|                              |        | (d) If applicable, explain how loss to follow-up was addressed                                                                                                                       | N/A                |
|                              |        | (e) Describe any sensitivity analyses                                                                                                                                                | N/A                |
| <b>Results</b>               |        |                                                                                                                                                                                      |                    |

|                          |     |                                                                                                                                                                                                              |         |
|--------------------------|-----|--------------------------------------------------------------------------------------------------------------------------------------------------------------------------------------------------------------|---------|
| Participants             | 13* | (a) Report numbers of individuals at each stage of study—eg numbers potentially eligible, examined for eligibility, confirmed eligible, included in the study, completing follow-up, and analysed            | 7,8     |
|                          |     | (b) Give reasons for non-participation at each stage                                                                                                                                                         | N/A     |
|                          |     | (c) Consider use of a flow diagram                                                                                                                                                                           | 7       |
| Descriptive data         | 14* | (a) Give characteristics of study participants (eg demographic, clinical, social) and information on exposures and potential confounders                                                                     | 7,8     |
|                          |     | (b) Indicate number of participants with missing data for each variable of interest                                                                                                                          | N/A     |
|                          |     | (c) Summarise follow-up time (eg, average and total amount)                                                                                                                                                  | 8       |
| Outcome data             | 15* | Report numbers of outcome events or summary measures over time                                                                                                                                               | 8,9     |
| Main results             | 16  | (a) Give unadjusted estimates and, if applicable, confounder-adjusted estimates and their precision (eg, 95% confidence interval). Make clear which confounders were adjusted for and why they were included | 8,19-25 |
|                          |     | (b) Report category boundaries when continuous variables were categorized                                                                                                                                    | 6       |
|                          |     | (c) If relevant, consider translating estimates of relative risk into absolute risk for a meaningful time period                                                                                             | N/A     |
| Other analyses           | 17  | Report other analyses done—eg analyses of subgroups and interactions, and sensitivity analyses                                                                                                               | N/A     |
| <b>Discussion</b>        |     |                                                                                                                                                                                                              |         |
| Key results              | 18  | Summarise key results with reference to study objectives                                                                                                                                                     | 9       |
| <b>Limitations</b>       |     |                                                                                                                                                                                                              |         |
| Interpretation           | 20  | Give a cautious overall interpretation of results considering objectives, limitations, multiplicity of analyses, results from similar studies, and other relevant evidence                                   | 12,13   |
| Generalisability         | 21  | Discuss the generalisability (external validity) of the study results                                                                                                                                        | 11      |
| <b>Other information</b> |     |                                                                                                                                                                                                              |         |
| Funding                  | 22  | Give the source of funding and the role of the funders for the present study and, if applicable, for the original study on which the present article is based                                                | 14      |

\*Give information separately for cases and controls in case-control studies and, if applicable, for exposed and unexposed groups in cohort and cross-sectional studies.

**Note:** An Explanation and Elaboration article discusses each checklist item and gives methodological background and published examples of transparent reporting. The STROBE checklist is best used in conjunction with this article (freely available on the Web sites of PLoS Medicine at <http://www.plosmedicine.org/>, Annals of Internal Medicine at <http://www.annals.org/>, and Epidemiology at <http://www.epidem.com/>). Information on the STROBE Initiative is available at [www.strobe-statement.org](http://www.strobe-statement.org).
